# Supplementary material
Source: Research Square preprint supplement (doi:10.21203/rs.3.rs-9593000/v1)
Supplement: Supplementary file 1 [file 060695d01db9b84e4f3ed055.xlsx]

## Sheet: DUO
Supplementary Table 11A: List genera with relative abundance 1.5% in DUO samples in either of two group. The highlighted in green colour are abundant in 17%M while red one are in 0%M fed sheep.
Genus	DUO_0%: mean rel. freq. (%)	DUO_0%: std. dev. (%)	DUO_17%: mean rel. freq. (%)	DUO_17%: std. dev. (%)	Fold Change
Succiniclasticum	0.0401027	0.0401027	2.32732	0.315502	58.034
Solibaculum	0.859384	0.17476	3.51566	0.294644	4.0909
Treponema	0.0191124	0.0173446	2.5164	1.77555	131.664
Ruminococcus	0.867488	0.5317	2.58661	0.141655	2.98172
Xylanibacter	0.033533	0.0167392	1.92015	0.535406	57.2613
Anseongella	0.0305695	0.0286507	1.77717	0.260545	58.1352
Achromobacter	0.00151771	0.00113395	0.37084	0.0946193	244.342
Enterobacter	0.0323929	0.0270896	2.39743	0.859491	74.011
Stenotrophomonas	0.00988487	0.00546545	0.981089	0.198074	99.2516
Saccharofermentans	0.270503	0.008873	1.5146	0.203721	5.5992
Subdivision5_GIS	0.394441	0.0360109	2.88152	0.0913564	7.30534
Pseudomonas	0.0942449	0.0208825	6.7415	1.48161	71.5318
Pantoea	0.0254865	0.00898495	23.6117	6.33154	926.438
Bifidobacterium	1.60596	0.607171	3.88751	0.174916	2.42067
Romboutsia	0.0489441	0.0270699	0.0876815	0.0584209	1.79146
Turicibacter	0.027185	0.0214286	0.102516	0.0849601	3.77107
Segatella	17.0285	1.69927	10.4015	1.76856	1.63711
Syntrophococcus	1.78535	0.11677	0.486957	0.0163261	3.66634
Bilifractor	5.56257	0.697672	0.279041	0.00282043	19.9346

## Sheet: JEJ
Supplementary Table 11B: List genera with relative abundance 1.5% in JEJ samples in either of two group. The highlighted in green colour are abundant in 17%M while red one are in 0%M fed sheep.
Genus	JEJ_0%: mean rel. freq. (%)	JEJ_0%: std. dev. (%)	JEJ_17%: mean rel. freq. (%)	JEJ_17%: std. dev. (%)	Fold change
Achromobacter	0.0651467	0.0499392	0.864658	0.332373	13.2725
Enterobacter	0.412072	0.383938	4.88906	0.784613	11.8646
Agrobacterium	0.0556621	0.00547729	0.565357	0.219069	10.157
Stenotrophomonas	0.164302	0.104232	3.29429	1.37988	20.0503
Sphingobacterium	0.182345	0.0933813	2.18552	1.26763	11.9856
Pseudomonas	1.2235	0.961931	13.2644	2.57641	10.8414
Pantoea	4.47301	4.29509	50.8213	6.94977	11.3618
Solibaculum	0.376535	0.11999	2.15232	0.47683	5.71611
Subdivision5_GIS	0.737729	0.0906494	2.3503	0.621886	3.18586
Bifidobacterium	16.5635	0.918768	2.17707	0.673971	7.60815
Bilifractor	2.96122	2.20477	0.160247	0.0256641	18.479
Syntrophococcus	3.55643	2.53265	0.126586	0.0101488	28.095
Turicibacter	6.9921	0.233128	0.0652589	0.0496663	107.144
Clostridioides	1.74623	0.0232171	0.0172078	0.0100113	101.479
Paeniclostridium	7.69028	0.323767	0.0304789	0.0148863	252.315
Terrisporobacter	1.82952	0.0586064	0.0105852	0.0105852	172.837
Romboutsia	31.0841	1.70699	0.0638515	0.0374641	486.818

## Sheet: IL
Supplementary Table 11C: List genera with relative abundance 1.5% in IL samples in either of two group. The highlighted in green colour are abundant in 17%M while red one are in 0%M fed sheep.
Genus	IL_0%: mean rel. freq. (%)	IL_0%: std. dev. (%)	IL_17%: mean rel. freq. (%)	IL_17%: std. dev. (%)	Fold Change
Solibaculum	0.226164	0.0524425	1.96353	0.212064	8.68185
Paeniclostridium	1.43338	0.288514	7.63382	0.671534	5.32576
Subdivision5_GIS	3.36991	0.337437	16.4838	0.171793	4.89147
Romboutsia	3.6344	0.923249	14.6428	1.40543	4.02894
Saccharofermentans	0.637938	0.190859	1.70143	0.170203	2.66708
Cellulosilyticum	1.12814	0.00150383	2.72531	0.117914	2.41575
Lysinibacillus	0.726213	0.281689	1.77347	0.0844056	2.44207
Pradoshia	0.90649	0.378542	1.96729	0.120612	2.17023
Peribacillus	1.82837	0.374729	3.32764	0.0926724	1.82
Turicibacter	10.341	1.36475	17.5027	0.871716	1.69254
Saccharibacteria_GIS	1.37631	0.277773	1.65133	0.711952	1.19982
Clostridioides	2.40047	0.614113	1.54948	0.033819	1.54921
Pseudomonas	2.07964	1.36432	1.23657	0.907315	1.68178
Pantoea	6.24293	5.17761	1.70619	1.29545	3.65899
Bifidobacterium	12.9096	3.20053	3.06913	0.315728	4.20629
Syntrophococcus	9.97639	1.63262	0.882637	0.0863598	11.3029
Bilifractor	8.59729	2.61544	0.439052	0.0354853	19.5815
Anaerobutyricum	3.0315	0.379682	0.121155	0.0142253	25.0216
Luoshenia	1.78863	0.263458	0.0701987	0.0223792	25.4796
