# Supplementary material
Source: Research Square preprint supplement (doi:10.21203/rs.3.rs-9593000/v1)
Supplement: Supplementary file 2 [file 12a22790386b4c68e5427dc0.xlsx]

## Sheet: S14A
Supplementary Table S14A: Relative abundance of different hydrolases within 3.2.1.X category in rumen solid and liquid fraction of the 0 and 17%M. Enzymes with relative abundance <1% are merged in the category other 3.2.1.X.
Enzyme	RUS_0%M: mean rel. freq. (%)	RUS_0%M: std. dev. (%)	RUS_17%M: mean rel. freq. (%)	RUS_17%M: std. dev. (%)	RUL_0%M: mean rel. freq. (%)	RUL_0%M: std. dev. (%)	RUL_17%M: mean rel. freq. (%)	RUL_17%M: std. dev. (%)
3.2.1.21 Beta-glucosidase	16.4865	0.0902935	12.8633	0.841725	12.9337	0.289751	12.78	0.360272
3.2.1.23 Beta-galactosidase	11.6924	1.11147	12.7493	0.632619	14.8678	1.13399	14.358	0.821207
3.2.1.4 Cellulase	7.24198	1.82112	7.94901	0.808372	4.21094	0.327672	6.73093	0.32827
3.2.1.55 Non-reducing end alpha-L-arabinofuranosidase	6.18902	0.655326	6.24181	0.404275	4.31272	0.188643	5.12288	0.67543
3.2.1.51 Alpha-L-fucosidase	5.09018	0.848401	4.46779	0.462319	7.62187	0.579519	4.89431	0.374402
3.2.1.177 Alpha-D-xyloside xylohydrolase	4.05705	0.619295	7.41869	0.290429	3.78791	0.256774	6.03486	0.436715
3.2.1.40 Alpha-L-rhamnosidase	3.9335	1.07129	3.61264	0.311955	4.67016	0.356052	2.91706	0.459557
3.2.1.22 Alpha-galactosidase	3.7679	0.106473	4.25404	0.200167	4.47333	0.405344	4.99732	0.209467
3.2.1.20 Alpha-glucosidase	3.43066	0.689573	2.5234	0.101067	3.71127	0.104825	2.2257	0.0929454
3.2.1.52 Beta-N-acetylhexosaminidase	3.28418	0.537166	2.26435	0.0973992	4.78112	1.07893	2.80006	0.236754
3.2.1.8 Endo-1,4-beta-xylanase	2.39427	0.843686	2.27692	0.300923	1.43669	0.111074	2.65321	0.343243
3.2.1.99 Arabinan endo-1,5-alpha-L-arabinosidase	1.95994	0.380942	3.55123	0.211128	2.03383	0.422875	2.99897	0.158582
3.2.1.37 Xylan 1,4-beta-xylosidase	1.82013	0.147607	2.88341	0.190556	1.19726	0.366095	1.90284	0.0815504
3.2.1.1 Alpha-amylase	1.51769	0.29663	2.01277	0.131638	1.49625	0.436661	2.22412	0.415291
3.2.1.78 Mannan endo-1,4-beta-mannosidase	1.5134	0.65061	1.62032	0.232584	0.856476	0.284822	1.15408	0.0745374
3.2.1.135 Neopullulanase	1.41319	0.219991	1.576	0.17458	1.17928	0.201472	1.44934	0.118273
3.2.1.172 Unsaturated rhamnogalacturonyl hydrolase	1.403	0.187908	1.01018	0.258462	1.35863	0.264303	1.11249	0.250161
3.2.1.45 Glucosylceramidase	1.38562	0.181954	0.953448	0.149586	1.40425	0.380405	0.920475	0.274189
3.2.1.89 Arabinogalactan endo-beta-1,4-galactanase	1.2891	0.272133	0.9084	0.0842397	1.61794	0.0604307	1.24419	0.104792
3.2.2.27 Uracil-DNA glycosylase	1.24888	0.16318	1.31151	0.0948298	2.56774	0.252367	1.73049	0.181623
3.2.1.86 6-phospho-beta-glucosidase	1.0777	0.169468	0.690557	0.135161	1.03075	0.430338	1.33918	0.0555304
3.2.2.31 Adenine glycosylase	1.06535	0.171286	1.07005	0.168397	1.19408	0.140174	1.35385	0.145264
3.2.1.180 Unsaturated chondroitin disaccharide hydrolase	0.98714	0.2401	0.743817	0.120984	1.00543	0.25246	0.951035	0.235454
3.2.1.139 Alpha-glucuronidase	0.983925	0.0306589	0.826081	0.11413	0.882919	0.178806	1.05377	0.0440797
3.2.1.25 Beta-mannosidase	0.963245	0.342866	0.476219	0.100654	1.00363	0.0704443	0.576197	0.0992284
3.2.1.31 Beta-glucuronidase	0.921381	0.109987	1.19828	0.282015	1.20457	0.440225	1.53578	0.339332
3.2.1.26 Beta-fructofuranosidase	0.894308	0.168123	0.4917	0.0378003	1.14374	0.467727	0.816091	0.0867659
3.2.1.3 Glucan 1,4-alpha-glucosidase	0.884108	0.156888	1.23995	0.0207028	1.69608	0.237106	1.69523	0.117749
3.2.1.50 Alpha-N-acetylglucosaminidase	0.68184	0.226662	1.93341	0.15146	0.436925	0.181654	1.14379	0.133057
3.2.1 Glycosidases, i	0.563367	0.16579	0.754578	0.0516286	0.511521	0.0612122	1.10625	0.274215
Others 3.2.1.X	9.85905	-	8.12676	-	9.37111	-	8.1775	-

## Sheet: S14B
Supplementary Table S14B: Relative abundance of different SEED subsystems category in rumen solid and liquid fraction of the 0 and 17%M. Functions with relative abundance <1% are merged in the category others.
Function	RUS_0%M: mean rel. freq. (%)	RUS_0%M: std. dev. (%)	RUS_17%M: mean rel. freq. (%)	RUS_17%M: std. dev. (%)	RUL_0%M: mean rel. freq. (%)	RUL_0%M: std. dev. (%)	RUL_17%M: mean rel. freq. (%)	RUL_17%M: std. dev. (%)	R0%M: mean rel. freq. (%)	R0%M: std. dev. (%)	R17%M: mean rel. freq. (%)	R17%M: std. dev. (%)	OM_0%M: mean rel. freq. (%)	OM_0%M: std. dev. (%)	OM_17%M: mean rel. freq. (%)	OM_17%M: std. dev. (%)	ABO_0%M: mean rel. freq. (%)	ABO_0%M: std. dev. (%)	ABO_17%M: mean rel. freq. (%)	ABO_17%M: std. dev. (%)
Utilization systems for glycans and polysaccharides (PULs, SUS)	5.1754	0.258331	6.40863	0.493727	3.76956	0.198561	4.65785	0.520781	4.93641	0.0592489	5.81538	0.259567	6.77361	0.0875092	8.02353	0.489437	4.79485	0.146763	6.54311	0.458141
Lactose utilization	2.08067	0.123943	2.37287	0.0898115	1.95473	0.14421	2.04354	0.0961863	1.96312	0.0989644	2.14087	0.0501068	2.31358	0.126242	2.57473	0.0188404	1.91576	0.18534	2.38885	0.0882236
DeNovo Purine Biosynthesis	1.87233	0.121196	1.93262	0.0889284	2.20141	0.0940233	1.92318	0.0361549	1.9419	0.0328892	1.86917	0.0586321	1.91485	0.0567479	1.87567	0.0623145	1.84986	0.0742005	1.90662	0.0139298
Cell division cluster	1.78672	0.0435742	1.92113	0.0395358	1.86768	0.102352	1.99048	0.0859054	1.90842	0.00426867	1.9744	0.102313	1.91722	0.082649	1.96128	0.0859809	1.83664	0.0817207	1.87271	0.0830596
Universal GTPases	1.70261	0.0718169	1.64879	0.0270494	1.64481	0.0279286	1.60973	0.0197424	1.75288	0.0793862	1.56135	0.0120852	1.74049	0.00207035	1.56225	0.0393898	1.72298	0.0604696	1.53127	0.0359608
De Novo Pyrimidine Synthesis	1.53698	0.0465716	1.5208	0.0101278	1.51763	0.0347223	1.47202	0.0262516	1.57599	0.037639	1.46403	0.0038816	1.54008	0.0759026	1.58002	0.0513179	1.48433	0.0824204	1.4806	0.0591951
Glycolysis and Gluconeogenesis	1.46056	0.0761635	1.37297	0.020924	1.46527	0.0513293	1.43066	0.0272325	1.42247	0.0643014	1.3538	0.0501636	1.40492	0.0463985	1.34282	0.00461339	1.43568	0.03121	1.37225	0.0308107
Ribosome LSU, bacterial	1.44622	0.132978	1.52955	0.0745825	1.41461	0.0695188	1.3781	0.12184	1.46443	0.1438	1.45013	0.123517	1.43189	0.149134	1.44155	0.114	1.53416	0.11937	1.38888	0.142589
DNA repair, UvrABC system	1.43659	0.019529	1.2151	0.0185567	1.46903	0.0944629	1.31197	0.0561321	1.3747	0.0325948	1.26578	0.0263167	1.3961	0.0409577	1.22027	0.0482712	1.34576	0.0266757	1.27766	0.0446256
Heat shock dnaK gene cluster extended	1.42134	0.108922	1.42696	0.0156883	1.48807	0.0224695	1.50971	0.0638127	1.47263	0.0630184	1.40411	0.0203323	1.32582	0.0399183	1.29403	0.0152249	1.43023	0.0366176	1.33508	0.0125699
Antibiotic targets in transcription	1.3542	0.0192028	1.15825	0.0621369	1.5418	0.11036	1.20296	0.0149968	1.38395	0.0582705	1.23649	0.0641527	1.38777	0.104596	1.18487	0.0660682	1.38203	0.0714348	1.19212	0.0297297
Type I restriction-modification systems	1.32734	0.28487	1.43487	0.18974	1.29472	0.0847145	1.31801	0.132285	1.34274	0.311528	1.38968	0.248018	1.35509	0.229097	1.44327	0.193483	1.62742	0.318017	1.35597	0.324499
Glycogen metabolism	1.32629	0.117548	1.42262	0.0818453	1.24761	0.0838117	1.40801	0.029181	1.37352	0.117261	1.35695	0.0326564	1.25262	0.0506482	1.26777	0.0601613	1.34799	0.0868472	1.33666	0.048485
D-Galacturonate and D-Glucuronate Utilization	1.31748	0.0954855	1.47584	0.0673633	1.18994	0.0700128	1.38309	0.0234392	1.32543	0.0589263	1.41921	0.0639255	1.51599	0.0367451	1.60158	0.0312811	1.30803	0.113873	1.54578	0.0478056
Antibiotic targets in DNA processing	1.21545	0.0534862	1.14203	0.0211401	1.1703	0.0904306	1.1787	0.0114481	1.19313	0.0236127	1.16956	0.0262804	1.20604	0.0334979	1.15634	0.0309237	1.21203	0.0244114	1.15138	0.030025
Pyruvate metabolism I: anaplerotic reactions, PEP	1.20499	0.0816703	1.26684	0.0467828	1.32597	0.0655483	1.35947	0.0321408	1.22449	0.071763	1.29006	0.112903	1.10172	0.0352338	1.14316	0.0182122	1.1638	0.0412831	1.21579	0.0308679
Ribosomal proteins, single-copy	1.14407	0.123919	0.952447	0.0150199	1.18134	0.0309779	0.922224	0.013465	1.12817	0.100507	0.940479	0.0578453	1.16074	0.0561791	0.871068	0.0378319	1.17313	0.158326	0.882749	0.0535586
Galactose utilization	1.14324	0.0393619	1.14429	0.00909565	1.21794	0.0845476	1.2072	0.0244096	1.17847	0.0518834	1.18072	0.0146699	1.15199	0.0294179	1.12933	0.0305559	1.16608	0.00909052	1.12462	0.0378132
RNA processing and degradation, bacterial	1.13899	0.0252194	1.10754	0.0188843	1.10748	0.0377446	1.14386	0.0155746	1.08461	0.0282703	1.11036	0.0191161	1.12493	0.0241631	1.07661	0.0293489	1.09238	0.00793159	1.12787	0.0526526
KDO2-Lipid A biosynthesis	0.811444	0.0354735	0.873385	0.0415422	1.06603	0.0841271	0.915136	0.0437445	0.763025	0.0216707	0.944671	0.014293	0.817534	0.027776	0.904295	0.0140004	0.765607	0.00546511	0.932816	0.0409127
Others	68.0971	-	66.6725	-	68.8641	-	68.6341	-	68.1895	-	67.6628	-	66.167	-	65.3456	-	68.4113	-	67.0372

## Sheet: S14C
Supplementary Table S14C: Relative abundance of different KEGG pathways in rumen solid and liquid fraction of the 0 and 17%M. Enzymes with relative abundance <1% are merged in the category other 3.2.1.X.
Pathway	RUS_0%M: mean rel. freq. (%)	RUS_0%M: std. dev. (%)	RUS_17%M: mean rel. freq. (%)	RUS_17%M: std. dev. (%)	RUL_0%M: mean rel. freq. (%)	RUL_0%M: std. dev. (%)	RUL_17%M: mean rel. freq. (%)	RUL_17%M: std. dev. (%)
K1000230 Purine metabolism	7.74301	0.11763	7.52438	0.083401	7.99672	0.153098	7.49808	0.118839
K1002010 ABC transporters	4.63367	0.10965	4.42398	0.0918358	3.68255	0.223609	3.93691	0.110404
K1000970 Aminoacyl-tRNA biosynthesis	3.67577	0.0623471	3.41438	0.0665444	3.97261	0.108476	3.53711	0.0500434
K1003010 Ribosome	3.35951	0.389032	3.2461	0.166357	3.36359	0.0952738	3.15054	0.108106
K1000052 Galactose metabolism	3.27567	0.213421	3.45603	0.11889	3.21034	0.196884	3.42336	0.128019
K1000500 Starch and sucrose metabolism	3.02955	0.276681	3.39959	0.179262	2.50566	0.131747	2.96682	0.10455
K1000240 Pyrimidine metabolism	2.85994	0.0452785	2.85214	0.00503662	2.84015	0.044618	2.79285	0.0100092
K1002020 Two-component system	2.83054	0.0892996	2.6703	0.10531	2.40697	0.167754	2.76458	0.0443041
K1000010 Glycolysis / Gluconeogenesis	2.82025	0.0635612	2.79917	0.0520274	2.77931	0.0511065	2.80703	0.0418404
K1000250 Alanine, aspartate and glutamate metabolism	2.77204	0.132273	3.09265	0.0605147	2.86176	0.0325906	3.15057	0.0435716
K1000260 Glycine, serine and threonine metabolism	2.61515	0.163747	2.54202	0.0597198	2.6945	0.069374	2.61538	0.00920919
K1003420 Nucleotide excision repair	2.27411	0.0210012	2.0619	0.0501876	2.30664	0.0951034	2.16174	0.0431266
K1000040 Pentose and glucuronate interconversions	2.23287	0.123346	2.52007	0.0724074	2.15509	0.091896	2.49431	0.0187784
K1000290 Valine, leucine and isoleucine biosynthesis	2.14135	0.0861239	2.19677	0.0212937	2.14549	0.0421977	2.2483	0.0512344
K1000520 Amino sugar and nucleotide sugar metabolism	2.08302	0.0551172	2.07592	0.0789007	1.9693	0.0319468	2.08997	0.0246445
K1000190 Oxidative phosphorylation	1.98266	0.0547179	2.1554	0.0394718	1.70743	0.0409429	1.93512	0.0454596
K1000330 Arginine and proline metabolism	1.91779	0.127616	2.02973	0.0562485	2.01117	0.0214466	2.04232	0.0237315
K1003018 RNA degradation	1.87206	0.0376262	1.89709	0.0345548	1.95598	0.0397905	1.91147	0.0600904
K1003060 Protein export	1.85658	0.0495986	1.94754	0.0447734	2.03615	0.0326375	1.85303	0.121357
K1003440 Homologous recombination	1.82322	0.0740314	1.78945	0.0531879	1.95777	0.0663476	1.86753	0.0393192
K1000270 Cysteine and methionine metabolism	1.76788	0.121372	1.79618	0.00821123	1.85127	0.0538603	1.98065	0.0946335
K1000460 Cyanoamino acid metabolism	1.76041	0.0739813	1.61308	0.0181721	1.03568	0.0896129	1.1994	0.0579685
K1000051 Fructose and mannose metabolism	1.7102	0.0328683	1.94039	0.0677655	2.01388	0.0443118	1.96384	0.0462013
K1000550 Peptidoglycan biosynthesis	1.59642	0.030057	1.62918	0.0253548	1.62656	0.0200539	1.66682	0.0380481
K1000300 Lysine biosynthesis	1.45857	0.0215634	1.52412	0.0487698	1.46181	0.0185469	1.53503	0.0152726
K1000030 Pentose phosphate pathway	1.44421	0.0609813	1.30666	0.00249876	1.33351	0.034625	1.34726	0.0534422
K1004112 Cell cycle - Caulobacter	1.32401	0.0402447	1.3579	0.0250833	1.39725	0.0482845	1.3336	0.0579736
K1000400 Phenylalanine, tyrosine and tryptophan biosynthesis	1.30169	0.0270958	1.40075	0.0192571	1.47719	0.0316872	1.41477	0.0322464
K1000900 Terpenoid backbone biosynthesis	1.28175	0.0377162	1.32514	0.0243877	1.43733	0.0133784	1.39421	0.0160135
K1000860 Porphyrin and chlorophyll metabolism	1.25565	0.0143469	1.55761	0.0244771	1.19407	0.138416	1.47724	0.0261086
K1000020 Citrate cycle (TCA cycle)	1.24609	0.115787	1.20689	0.0105832	1.31746	0.0365854	1.24626	0.00998092
K1003430 Mismatch repair	1.13038	0.018896	1.11563	0.0219152	1.21035	0.0140168	1.14491	0.0243446
K1000620 Pyruvate metabolism	1.11838	0.0767229	1.06412	0.0137206	1.07316	0.025172	1.02338	0.0505923
K1000340 Histidine metabolism	1.0981	0.0983087	1.00281	0.0306243	1.08877	0.0435399	1.06669	0.0713599
K1003030 DNA replication	1.08699	0.0149444	1.16337	0.0308385	1.16396	0.0494286	1.23278	0.0112804
K1000061 Fatty acid biosynthesis	1.0546	0.0244872	1.09837	0.0264834	1.27591	0.0309553	1.14435	0.0402574
K1000511 Other glycan degradation	0.94177	0.174862	0.667235	0.0661288	0.935997	0.105574	0.674328	0.077779
K1000564 Glycerophospholipid metabolism	0.92742	0.0218529	0.845703	0.0150663	0.911708	0.00568052	0.868957	0.0371734
K1000540 Lipopolysaccharide biosynthesis	0.904083	0.0714852	0.936456	0.0400518	1.41133	0.035544	1.11645	0.070507
Others	17.7926		17.3538		18.2236		17.922
