# Supplementary material
Source: Research Square preprint supplement (doi:10.21203/rs.3.rs-9593000/v1)
Supplement: Supplementary file 3 [file 22a9c55cf82a533136922fa7.xlsx]

## Sheet: Supplementary Table S18
Supplementary Table S18: Relative abundance of different rumen anaerobic fungi in sheep's forestomach (FS) with and without feeding moringa. Green highlited increased while red highlited decreased up on feeding Moringa.
Genus	p-values (corrected)	Effect size	C_RUS_0%M: (%)	C_RUS_0%M: std. dev. (%)	D_RUS_0%M: (%)	D_RUS_0%M: std. dev. (%)	RUS fold change	A_RUL_0%M: (%)	A_RUL_0%M: std. dev. (%)	B_RUL_17%M: (%)	B_RUL_17%M: std. dev. (%)	RUL Fold change	E_RE_0%M: (%)	E_RE_0%M: std. dev. (%)	F_RE_0%M: (%)	F_RE_0%M: std. dev. (%)	RE fold change	G_OM_0%M: (%)	G_OM_0%M: std. dev. (%)	H_OM_0%M: (%)	H_OM_0%M: std. dev. (%)	OM Fold change	I_ABO_0%M: (%)	I_ABO_0%M: std. dev. (%)	J_ABO_0%M: (%)	J_ABO_0%M: std. dev. (%)	ABO fold change
Neocallimastix	6.88889	0.955752	60.4488	2.89221	95.1458	1.74862	1.57399	64.0973	7.25533	89.8836	3.15491	1.4023	73.2749	3.97515	90.0066	1.15558	1.22834	75.643	2.77528	93.6001	0.97171	1.23739	40.4598	2.60529	84.7977	1.97531	2.09585
Piromyces	1.5122	0.960026	39.2489	2.92347	1.5884	0.568445	24.7098	35.6243	7.2301	2.27781	0.632605	15.6397	26.3941	4.02896	3.32689	0.393642	7.93356	24.0769	2.80148	3.09026	1.20176	7.79124	45.6138	3.53298	14.5822	1.36133	3.12804
Caecomyces	2.2963	0.890797	0.187425	0.0155738	0.00082024	0.00115999		0.198088	0.0167196	0.00123036	0.00100459		0.172661	0.00553282	0.00861252	0.00758445		0.161587	0.0263947	0.0020506	0.00209121		0.105811	0.0996592	0.13698	0.00753997
Gyroporus	1.77143	0.427537	0.0557763	0.0198474	0.0451132	0.00418242		0.0426525	0.00209121	0.0344501	0.0065875		0.0795633	0.0144302	0.0344501	0.00958313		0.0684901	0.0345135	0.0631585	0.020888		0.0535207	0.0092277	0.0434727	0.0151134
Aklioshbomyces	1.31915	0.987943	0.023787	0.00405998	0.704586	0.334257		0.0192756	0.00405998	0.745598	0.235159		0.0188655	0.00115999	1.08969	0.0865888		0.0114834	0.00452992	0.916208	0.115856		13.5229	1.11348	0.394946	0.548979
Capellomyces	3.1	0.900262	0	0	2.46687	0.867785		0.00082024	0.000579997	6.99255	2.30577		0.00041012	0.000579997	5.4792	0.661818		0.00041012	0.000579997	2.26755	0.266511		0.00984288	0.00246072	0.0270679	0.0382798
Others			0.0352703		0.0483942			0.0176352		0.064799			0.0594674		0.054546			0.0381412		0.0606978			0.234384		0.0176352
