# Supplementary material
Source: Research Square preprint supplement (doi:10.21203/rs.3.rs-9593000/v1)
Supplement: Supplementary file 4 [file 30d819806d62a61fd2f10cfe.xlsx]

## Sheet: 12A
Supplementary Table 12A: List of genera with relative abundance 1.5% in CE samples in either of two group. The highlighted in green colour are abundant in 17%M while red one are in 0%M fed sheep.
Genus	CE_0%: mean rel. freq. (%)	CE_0%: std. dev. (%)	CE_17%: mean rel. freq. (%)	CE_17%: std. dev. (%)	Fold change
Christensenella	5.46385	0.311878	5.76487	0.868425	1.05509
Mediterranea	2.58807	1.35858	5.18994	0.301154	2.00533
Vescimonas	2.08009	0.186429	2.15052	0.328759	1.03386
Paraprevotella	2.12228	1.11615	2.15975	0.204686	1.01766
Lucifera	0.6948	0.1163	1.36407	0.0560026	1.96326
Acholeplasma	0.719144	0.426759	1.98694	0.406828	2.76292
Muribaculum	0.4333	0.223214	3.07218	0.423461	7.0902
Caproiciproducens	0.145909	0.0212609	1.98804	0.078899	13.6252
Falsiporphyromonas	5.34529	2.06815	2.5141	0.0834591	2.12612
Phocaeicola	4.9917	1.40933	4.68773	0.310943	1.06484
Alistipes	3.85428	1.71397	2.3412	0.088442	1.64629
Akkermansia	3.64983	1.7285	0.111925	0.0248389	32.6097
Beduinibacterium	2.56815	1.69636	1.85102	0.0899907	1.38742
Mageeibacillus	3.32842	0.873894	3.30218	0.394846	1.00795
Ruminococcus	1.6058	0.184148	1.15099	0.0832717	0.716771
Acetivibrio	2.1815	0.021816	2.13598	0.0300245	0.979134
Luoshenia	1.85984	1.00693	1.12647	0.0521979	0.605678
Solibaculum	1.45965	0.165257	1.96951	0.106035	1.34931

## Sheet: 12B
Supplementary Table 12B: List of genera with relative abundance 1.5% in FE samples in either of two group. The highlighted in green colour are abundant in 17%M while red one are in 0%M fed sheep.
Genus	FE_0%: mean rel. freq. (%)	FE_0%: std. dev. (%)	FE_17%: mean rel. freq. (%)	FE_17%: std. dev. (%)	Fold change
Mediterranea	2.46782	1.01698	3.11744	0.444146	1.26323
Beduinibacterium	3.74578	1.95776	4.15601	0.171485	1.10952
Luoshenia	1.88754	0.335313	2.25253	0.111307	1.19337
Solibaculum	1.67059	0.000124695	2.25037	0.0571497	1.34705
Saccharofermentans	1.10831	0.0268308	1.3746	0.105479	1.24027
Acholeplasma	0.695688	0.196545	1.7438	0.0484967	2.50658
Muribaculum	0.507786	0.231594	3.69558	0.318816	7.27781
Romboutsia	0.315037	0.0155512	0.672779	0.142224	2.13556
Turicibacter	0.36213	0.0277038	0.92599	0.187377	2.55707
Subdivision5_genera_incertae_sedis	0.204544	0.104716	1.07897	0.0463849	5.27501
Caproiciproducens	0.140861	0.00222695	1.80928	0.168284	12.8444
Christensenella	6.37398	0.421021	5.99543	0.395967	1.06314
Falsiporphyromonas	5.545	1.79311	2.68806	0.153049	2.06283
Phocaeicola	4.26842	1.37173	3.81461	0.710515	1.11897
Alistipes	4.11815	1.71395	2.8707	0.228374	1.43455
Akkermansia	3.94358	1.88378	0.103289	0.0231687	38.18
Syntrophococcus	0.923632	0.830024	0.268319	0.0376497	3.4423
Mageeibacillus	2.623	0.0856902	2.0151	0.162705	1.30167
Paraprevotella	2.14963	0.966665	2.05406	0.217091	1.04653
Vescimonas	2.48599	0.135022	2.2327	0.121471	1.11345
Acetivibrio	1.99693	0.00629427	1.69625	0.0543643	1.17727
Ruminococcus	2.17887	0.100549	1.70467	0.105169	1.27818
Jonquetella	0.918103	0.224934	0.835613	0.107548	1.09872
