# Supplementary material
Source: Research Square preprint supplement (doi:10.21203/rs.3.rs-9593000/v1)
Supplement: Supplementary file 5 [file 474d5a18de0b5b775bb69257.xlsx]

## Sheet: Supplementrary Table S6
Supplementary Table S6: List of major phyla present in the three major parts of GIT if Sheep. Multiple group comparison between three groups was done using Kruskal-Wallis test with > 0.95% CI and Bonferroni multiple test correction in STAMP software.
Phylum	p-values	p-values (corrected)	Effect size	FS-0%M: mean rel. freq. (%)	FS-0%M: std. dev. (%)	FS-17%M: mean rel. freq. (%)	Fold change (17%M/0%M)	FS-17%M: std. dev. (%)	SI-0%M: mean rel. freq. (%)	SI-0%M: std. dev. (%)	SI-17%M: mean rel. freq. (%)	SI-17%M: std. dev. (%)	Fold change (17%M/0%M)	LI-0%M: mean rel. freq. (%)	LI-0%M: std. dev. (%)	LI-17%M: mean rel. freq. (%)	LI-17%M: std. dev. (%)	Fold change (17%M/0%M)
Bacteroidota	2.28363e-07	1.22485e-06	0.908129	50.3006	6.29756	52.2305	1.03837	2.99156	7.66238	9.148	8.58479	8.37927	1.12038	19.9197	7.3296	20.0135	1.50164	1.00471
Bacillota	4.81061e-05	0.000135155	0.662498	30.0231	4.43919	29.0978	0.969181	2.49937	61.7832	14.821	40.5631	26.1169	0.656539	66.5996	9.66567	67.9513	1.38611	1.0203
Pseudomonadota	0.00031275	0.000768843	0.456269	5.65757	1.31136	6.08717	1.07593	1.93145	14.9121	11.2435	34.4811	28.3175	2.31229	1.78196	0.366581	3.14985	1.24064	1.76763
Verrucomicrobiota	0.000648012	0.00147049	0.412973	2.78651	0.651419	4.04588	1.45195	1.97098	1.39982	1.1946	8.40665	5.96482	6.00551	3.62207	1.76099	1.26802	0.311826	0.350082
Actinomycetota	0.00108074	0.00236161	0.623869	3.38936	3.19966	1.30337	0.384548	1.66592	11.9767	4.95206	4.16093	1.75102	0.347419	1.4081	0.807609	0.699261	0.166179	0.4966
Fibrobacterota	8.53482e-08	8.39257e-07	0.778649	2.4102	0.880512	1.94345	0.806344	0.62464	0.013842	0.0161879	0.186144	0.224992	13.4477	0.00401797	0.00257264	0.169331	0.028313	42.1434
Spirochaetota	2.10055e-07	1.23932e-06	0.805718	1.63987	0.295601	1.3613	0.830129	0.336983	0.0278333	0.0206055	0.220268	0.266287	7.91383	0.680646	0.415965	0.947264	0.160602	1.39171
Mycoplasmatota	8.92441e-08	7.522e-07	0.874662	0.911633	0.145508	1.20557	1.32242	0.165549	0.0665206	0.0266203	0.136405	0.135322	2.05057	0.847845	0.351755	1.69157	0.287129	1.99514
Synergistota	1.44817e-08	8.54418e-07	0.895939	0.523351	0.143459	0.324678	0.620382	0.0574857	0.0630325	0.0444485	0.0723033	0.0542389	1.14708	1.60223	0.32698	1.38637	0.337503	0.865273
Lentisphaerota	5.96624e-07	2.70776e-06	0.520743	0.308749	0.0767118	0.108352	0.350938	0.0429241	0.554117	0.644576	0.118366	0.0602849	0.213612	1.19902	0.71334	0.0282359	0.00265872	0.0235491
Others				2.04903		2.29192			1.54048		3.06998			2.33483		2.69527
Bacillota:Bacteroidota				0.596873		0.557103			8.06319		4.725			3.34341		3.39527
