# Supplementary material
Source: Research Square preprint supplement (doi:10.21203/rs.3.rs-9593000/v1)
Supplement: Supplementary file 6 [file 6e1da2ec703021c866da575c.xlsx]

## Sheet: S15A
Supplementary Table S15A: Relative abundance of top 25 enzymmes in small intestine (SI) of sheep fed with and without moringa.
EC	A_DUO-0%M: mean rel. freq. (%)	A_DUO-0%M: std. dev. (%)	B_DUO-17%M: mean rel. freq. (%)	B_DUO-17%M: std. dev. (%)	C_JEJ-0%M: mean rel. freq. (%)	C_JEJ-0%M: std. dev. (%)	D_JEJ-17%M: mean rel. freq. (%)	D_JEJ-17%M: std. dev. (%)	E_IL-0%M: mean rel. freq. (%)	E_IL-0%M: std. dev. (%)	F_IL-17%M: mean rel. freq. (%)	F_IL-17%M: std. dev. (%)
7.1.1.9 Cytochrome-c oxidase	2.59873	2.39882	2.9334	1.14696	1.40303	0.419266	2.00452	0.302157	0.247134	0.0873574	1.48059	0.585234
7.1.1.2 NADH:ubiquinone reductase (H(+)-translocating)	1.91411	1.68154	1.94352	0.818934	0.963342	0.164828	1.42562	0.178624	0.430992	0.00627868	1.1602	0.353036
2.7.13.3 Histidine kinase	0.447701	0.392034	0.422176	0.110676	0.358783	0.214206	0.287922	0.102297	0.944937	0.197162	0.596349	0.154688
1.1.1 With NAD(+) or NADP(+) as acceptor	0.352027	0.211398	0.405208	0.0925525	0.486781	0.224701	0.335897	0.0651362	0.747489	0.212268	0.527279	0.0402467
3.6.4.12 DNA helicase	0.341046	0.229413	0.549	0.0250713	0.585242	0.285316	0.287398	0.115416	1.09026	0.28822	0.920424	0.262365
3.6.4.13 RNA helicase	0.309498	0.190545	0.473973	0.0818884	0.25086	0.0670673	0.544627	0.135818	0.528767	0.0633944	0.484245	0.144461
2.7.7.7 DNA-directed DNA polymerase	0.306451	0.288363	0.389921	0.0449755	0.343712	0.237233	0.239574	0.133935	1.07516	0.322453	1.06181	0.231039
3.4.24 Metalloendopeptidases	0.259034	0.120028	0.362463	0.00800015	0.26906	0.20199	0.241084	0.070862	0.681275	0.258612	0.439107	0.0153678
1.2.1 With NAD(+) or NADP(+) as acceptor	0.257178	0.0723861	0.149367	0.0498281	0.175978	0.0731774	0.176021	0.0440681	0.323442	0.0742908	0.24866	0.0446291
5.2.1.8 Peptidylprolyl isomerase	0.253307	0.143904	0.144902	0.0742502	0.161137	0.0795176	0.208064	0.12515	0.173683	0.0253461	0.209498	0.0484808
2.1.1 Methyltransferases	0.239631	0.143854	0.205513	0.111112	0.335435	0.0582428	0.191652	0.0665668	0.554045	0.158613	0.35686	0.0705329
2.4.1 Hexosyltransferases	0.232035	0.156401	0.343038	0.100051	0.210664	0.0526496	0.112416	0.0239391	0.58792	0.0341482	0.338943	0.073734
5.6.2.2 DNA topoisomerase (ATP-hydrolyzing)	0.2241	0.0989763	0.22125	0.0677121	0.201466	0.141826	0.079858	0.044645	0.481925	0.0969199	0.703406	0.0524912
3.6.4 Acting on ATP; involved in cellular and subcellular movement	0.213471	0.0692551	0.212436	0.0328848	0.311166	0.190219	0.240826	0.0692158	0.623455	0.122339	0.538087	0.0776081
2.3.1.9 Acetyl-CoA C-acetyltransferase	0.207731	0.182538	0.112408	0.0287126	0.126089	0.035285	0.144556	0.0405863	0.145892	0.0482852	0.169811	0.0618876
3.1.1 Carboxylic ester hydrolases	0.205537	0.0326076	0.277063	0.0372705	0.201103	0.107995	0.23984	0.102555	0.193605	0.0589697	0.203182	0.062227
1.2.1.3 Aldehyde dehydrogenase (NAD(+))	0.199118	0.0281065	0.201164	0.0762505	0.118076	0.0627762	0.27151	0.0965755	0.0964336	0.0173946	0.148413	0.00657985
3.6.3 Acting on acid anhydrides; catalyzing transmembrane movement of substances	0.193377	0.125326	0.234529	0.086329	0.226097	0.0510521	0.144609	0.0407095	0.386443	0.183333	0.350833	0.0120527
2.2.1.6 Acetolactate synthase	0.190684	0.116649	0.102696	0.0438889	0.109701	0.0518849	0.12841	0.0599819	0.267351	0.0739104	0.21603	0.0760545
1.2.1.12 Glyceraldehyde-3-phosphate dehydrogenase (phosphorylating)	0.180893	0.0522823	0.158181	0.0674038	0.101325	0.0415188	0.191963	0.0375831	0.166836	0.0615328	0.0886969	0.0408603
2.7.7 Nucleotidyltransferases	0.180394	0.144094	0.192772	0.105388	0.175615	0.0520095	0.0961102	0.0388654	0.364173	0.0754593	0.16194	0.0149671
2.4.1.1 Glycogen phosphorylase	0.178538	0.0445519	0.269718	0.149221	0.303021	0.108665	0.254787	0.199267	0.250394	0.0401192	0.372314	0.0558541
1.8.1.4 Dihydrolipoyl dehydrogenase	0.17212	0.0168255	0.0982302	0.0579636	0.0935428	0.045502	0.0802221	0.0229263	0.0838537	0.0328041	0.0678235	0.0352976
6.3.5.5 Carbamoyl-phosphate synthase (glutamine-hydrolyzing)	0.170942	0.0548797	0.187647	0.0294931	0.218446	0.0943315	0.128721	0.0610579	0.321856	0.0916864	0.553304	0.0118839
2.8.3.5 3-oxoacid CoA-transferase	0.170603	0.0262067	0.128594	0.0569793	0.067232	0.0235549	0.0480817	0.000481712	0.0319118	0.00478459	0.0538221	0.00849313
Others	90.0017	92.979	89.2808	96.4962	92.2031	96.9152	91.8957	97.8216	89.2008	97.3643	88.5484	97.4599

## Sheet: S15B
Supplementary Table S15B: Relative abundance of top 25 SEED level 3 in small intestine (SI) of sheep fed with and without moringa.
Function	A_DUO-0%M: mean rel. freq. (%)	A_DUO-0%M: std. dev. (%)	B_DUO-17%M: mean rel. freq. (%)	B_DUO-17%M: std. dev. (%)	C_JEJ-0%M: mean rel. freq. (%)	C_JEJ-0%M: std. dev. (%)	D_JEJ-17%M: mean rel. freq. (%)	D_JEJ-17%M: std. dev. (%)	E_IL-0%M: mean rel. freq. (%)	E_IL-0%M: std. dev. (%)	F_IL-17%M: mean rel. freq. (%)	F_IL-17%M: std. dev. (%)
Heme O and Heme A biosynthesis (with selected terminal oxidases)	5.70329	3.85125	4.98129	1.54334	3.13574	1.57253	5.04924	0.470019	0.367652	0.0423941	1.74439	0.637878
Respiratory Complex I	3.38168	2.24977	2.78892	1.19067	2.17133	1.05465	3.62705	0.309216	0.363642	0.0720317	1.04829	0.296203
Translation initiation factors, bacterial	0.931331	0.234849	0.66593	0.171095	0.870857	0.15267	1.25896	0.230184	0.299573	0.007962	0.399896	0.0669775
Universal GTPases	0.812213	0.245753	1.08346	0.0155876	1.23822	0.139099	1.41821	0.286037	1.27358	0.0847019	1.28025	0.202627
Pyridoxin (Vitamin B6) Biosynthesis	0.733143	0.28527	0.652774	0.180595	0.620583	0.240909	0.859399	0.129367	0.998033	0.0783381	0.901358	0.0330351
Lipoylated proteins	0.727942	0.248035	0.650706	0.0572269	0.560434	0.142253	0.871694	0.363235	0.446163	0.0361165	0.470099	0.133876
Glycerolipid and Glycerophospholipid Metabolism in Bacteria	0.687214	0.150389	0.639057	0.126783	0.77542	0.26502	0.914297	0.0592322	1.20311	0.0754867	0.921189	0.0497251
Type VI secretion system	0.681967	0.327843	0.399068	0.129587	0.270075	0.0535818	0.398161	0.248046	0.816255	0.226814	0.238134	0.158548
Flagellum	0.681334	0.38191	0.347286	0.137398	0.53245	0.237937	0.514733	0.0584265	0.680881	0.193951	0.402499	0.195029
Cell division cluster	0.677447	0.312207	0.941251	0.156019	0.654243	0.535322	0.380948	0.0918175	1.21831	0.0630838	1.16952	0.0887157
Pyruvate metabolism I: anaplerotic reactions, PEP	0.601237	0.131974	0.739224	0.206319	0.885994	0.452482	0.706297	0.162754	0.909149	0.0890566	1.16619	0.23317
Pentose phosphate pathway	0.591423	0.262116	0.424275	0.156344	0.670743	0.451136	0.489269	0.087071	0.876286	0.0463176	0.661568	0.0850442
Heat shock dnaK gene cluster extended	0.585685	0.177304	1.12375	0.234881	1.2783	0.291027	1.41899	0.317259	1.42174	0.244077	1.37855	0.108156
Putative oxidase COG2907	0.580438	0.191874	0.360021	0.152961	0.262595	0.0145969	0.511853	0.0180669	0.581508	0.110445	0.322726	0.0917958
Tripartite multidrug efflux systems (of RND type) in Pseudomonas	0.564839	0.31787	0.32714	0.0972147	0.273155	0.0864313	0.296616	0.139272	0.438957	0.0545383	0.426843	0.143538
DeNovo Purine Biosynthesis	0.509918	0.14643	1.10479	0.372067	0.896202	0.396591	0.830353	0.128036	1.53232	0.0715344	1.6931	0.182046
Glycolysis and Gluconeogenesis	0.507974	0.0995791	1.34964	0.160036	1.06789	0.514798	1.40933	0.161159	1.50585	0.159959	1.4093	0.204194
Galactose utilization	0.492518	0.115155	0.806454	0.11041	0.737184	0.543492	0.702328	0.0465755	0.93716	0.0623278	1.27046	0.140872
Glycogen metabolism	0.482703	0.182422	1.00563	0.231191	0.913186	0.240683	0.747885	0.270006	1.29845	0.170821	1.36254	0.133235
Pyruvate metabolism II: acetyl-CoA, acetogenesis from pyruvate	0.457574	0.175393	0.522094	0.238762	0.485545	0.134692	0.377367	0.152678	0.485418	0.0753717	0.410394	0.111288
Folate biosynthesis cluster	0.446542	0.096466	0.729062	0.0395124	0.841289	0.246449	0.482419	0.101774	0.756922	0.140054	0.731858	0.0952799
De Novo Pyrimidine Synthesis	0.445183	0.136976	0.97839	0.174764	0.897478	0.706685	0.480629	0.110867	1.43138	0.0294077	1.71033	0.0781254
Antibiotic targets in DNA processing	0.435511	0.0634065	0.452056	0.127133	0.378272	0.17895	0.131994	0.0687355	0.784962	0.112014	1.11203	0.0923638
S-Adenosyl-L-homocysteine recycling	0.427103	0.036178	0.497971	0.095035	0.649183	0.126759	0.504691	0.276332	0.535075	0.0481457	0.480273	0.0258485
Proline biosynthesis (for review)	0.411504	0.207038	0.391517	0.0760281	0.558278	0.218867	0.246776	0.135844	0.631194	0.0417531	0.695044	0.0734325
