# Supplementary material
Source: Research Square preprint supplement (doi:10.21203/rs.3.rs-9593000/v1)
Supplement: Supplementary file 7 [file 70f8f3f6a0d6e9c03fe1e506.xlsx]

## Sheet: Sheet 1
Supplementary Table 13: The table summarizes the result of post-hoc pairwise comparison with Mann-Whitney tests for each pairs uisng shotgun data. The statistic is W-statistic for nonparametric tests. The multi-testing adjustment is based on Benjamini-Hochberg procedure (FDR).
Pair	Statistic	P-value	FDR
Simpson
FS-17%M vs FS-0%M	65	0.050222	0.057949
SI-17%M vs SI-0%M	34	0.60481	0.64801
LI-17%M vs LI-0%M	12	0.66234	0.66234
Shannon
FS-17%M vs FS-0%M	44	0.0036743	0.0045929
SI-17%M vs SI-0%M	43	0.86331	0.86331
LI-17%M vs LI-0%M	22	0.24675	0.26438
Cho1
FS-17%M vs FS-0%M	64	0.045334	0.048572
SI-17%M vs SI-0%M	48	0.5457	0.5457
LI-17%M vs LI-0%M	30	0.004329	0.0059032
Observed
FS-17%M vs FS-0%M	68.5	0.071059	0.076135
SI-17%M vs SI-0%M	48	0.5457	0.5457
LI-17%M vs LI-0%M	30	0.007827	0.010673
ACE
FS-17%M vs FS-0%M	59	0.026354	0.030409
SI-17%M vs SI-0%M	48	0.5457	0.5457
LI-17%M vs LI-0%M	30	0.004329	0.0059032
