# Supplementary material
Source: Research Square preprint supplement (doi:10.21203/rs.3.rs-9593000/v1)
Supplement: Supplementary file 9 [file 82a7b1b1d70d141bd3546fa5.xlsx]

## Sheet: S16A
Supplementary Table S16A: Relative abundance of top 25 Enzymes in large intestine (LI) of sheep fed with and without moringa.
Enzyme	A-CE-17%M: mean rel. freq. (%)	A-CE-17%M: std. dev. (%)	B-CE-17%M: mean rel. freq. (%)	B-CE-17%M: std. dev. (%)	C-FE-0%M: mean rel. freq. (%)	C-FE-0%M: std. dev. (%)	D-FE-0%M: mean rel. freq. (%)	D-FE-0%M: std. dev. (%)
3.6.4.12 DNA helicase	1.46916	0.111038	1.36989	0.0272124	1.53009	0.0591192	1.39349	0.018689
2.7.7.7 DNA-directed DNA polymerase	1.45825	0.0540175	1.48581	0.0570149	1.51826	0.0681095	1.48655	0.0192643
3.2.1.23 Beta-galactosidase	1.12345	0.079925	1.07469	0.0668394	1.23167	0.150672	1.17661	0.00563238
2.7.7.6 DNA-directed RNA polymerase	1.10846	0.041417	1.13148	0.0639438	1.13283	0.101443	1.15859	0.0413867
5.6.2.2 DNA topoisomerase (ATP-hydrolyzing)	1.07231	0.0353105	0.972217	0.0273542	1.06415	0.0254831	0.975313	0.0430855
1.1.1 With NAD(+) or NADP(+) as acceptor	0.812522	0.0536353	0.832764	0.0369414	0.752438	0.0572228	0.782187	0.0125924
1.2.7 With an iron-sulfur protein as acceptor	0.795374	0.0243006	0.880393	0.0264317	0.884741	0.0656885	0.799309	0.0147201
3.4.24 Metalloendopeptidases	0.709969	0.0190166	0.651458	0.024412	0.733067	0.0200144	0.709054	0.0231685
3.2.1.21 Beta-glucosidase	0.665751	0.0636517	0.659318	0.0210457	0.876304	0.101972	0.655073	0.0352178
3.6.4 Acting on ATP; involved in cellular and subcellular movement	0.652298	0.0376447	0.709712	0.033714	0.645326	0.106026	0.688916	0.0235968
3.6.3 Acting on acid anhydrides; catalyzing transmembrane movement of substances	0.646536	0.058538	0.664464	0.0231415	0.720777	0.0244725	0.657607	0.0404803
3.1 Acting on ester bonds	0.642144	0.0262849	0.640622	0.0381469	0.721169	0.058191	0.664894	0.00915702
2.4.1 Hexosyltransferases	0.612294	0.0110964	0.535071	0.0148645	0.603686	0.0305231	0.50902	0.0099428
3.1.21.3 Type I site-specific deoxyribonuclease	0.586175	0.195581	0.563792	0.0854718	0.591534	0.152519	0.626915	0.0627086
5.6.2.1 DNA topoisomerase	0.566404	0.0297504	0.651454	0.0448222	0.547159	0.043362	0.664616	0.0568429
2.1.1.72 Site-specific DNA-methyltransferase (adenine-specific)	0.538094	0.079823	0.536922	0.097305	0.683363	0.251014	0.634427	0.042924
3.2.1.51 Alpha-L-fucosidase	0.536337	0.0544685	0.456279	0.0190713	0.441583	0.0132221	0.440201	0.0209552
7.4.2.8 Protein-secreting ATPase	0.534346	0.0379217	0.648946	0.0321283	0.588618	0.0286883	0.6725	0.0476514
7.1.1.2 NADH:ubiquinone reductase (H(+)-translocating)	0.529188	0.0132019	0.566157	0.0588973	0.424631	0.0506177	0.500518	0.00496824
3.4 Acting on peptide bonds (peptidases)	0.504575	0.0321013	0.489617	0.00668668	0.472234	0.0775857	0.521524	0.0396255
6.3.1.2 Glutamine synthetase	0.502289	0.0486355	0.604442	0.0389118	0.470894	0.0105609	0.644807	0.0144811
6.3.5.5 Carbamoyl-phosphate synthase (glutamine-hydrolyzing)	0.48975	0.00464322	0.613723	0.0266336	0.580505	0.0159186	0.626689	0.0239131
6.1.1.20 Phenylalanine--tRNA ligase	0.482796	0.0634281	0.388982	0.00849719	0.423	0.0644182	0.385016	0.00756205
6.3.5.3 Phosphoribosylformylglycinamidine synthase	0.470093	0.027346	0.484458	0.0192682	0.481329	0.0139209	0.452799	0.0272585
3.2.1.52 Beta-N-acetylhexosaminidase	0.43438	0.0223664	0.352842	0.0266082	0.374348	0.0702977	0.300759	0.034719
7.2.1.2 Ferredoxin--NAD(+) oxidoreductase (Na(+)-transporting)	0.429113	0.0215543	0.412161	0.00292803	0.377519	0.109271	0.417319	0.0162279

## Sheet: S16B
Supplementary Table S16A: Relative abundance of top 25 SEED level 3 in large intestine (LI) of sheep fed with and without moringa.
Function	A-CE-17%M: mean rel. freq. (%)	A-CE-17%M: std. dev. (%)	B-CE-17%M: mean rel. freq. (%)	B-CE-17%M: std. dev. (%)	C-FE-0%M: mean rel. freq. (%)	C-FE-0%M: std. dev. (%)	D-FE-0%M: mean rel. freq. (%)	D-FE-0%M: std. dev. (%)
Universal GTPases	2.07752	0.0757186	2.04443	0.0627655	1.9487	0.175027	2.08903	0.0210792
DeNovo Purine Biosynthesis	2.05024	0.0381737	2.23755	0.044377	2.07286	0.0492343	2.24755	0.0460211
Utilization systems for glycans and polysaccharides (PULs, SUS)	1.94195	0.117653	0.975135	0.109143	2.74944	1.26141	1.14271	0.0836623
Heat shock dnaK gene cluster extended	1.86382	0.0723658	1.8832	0.0239537	1.7567	0.232096	1.82262	0.0224938
Cell division cluster	1.76093	0.0834701	1.74183	0.0323156	1.83371	0.0405422	1.7371	0.0134113
De Novo Pyrimidine Synthesis	1.65938	0.0216758	1.89702	0.0462111	1.63851	0.0830023	1.91979	0.00776702
Glycolysis and Gluconeogenesis	1.63957	0.0280486	1.6416	0.0226547	1.61017	0.0681786	1.61385	0.046696
Ribosome LSU, bacterial	1.62295	0.0631069	1.6934	0.109356	1.54288	0.0320462	1.70938	0.0834088
Glycogen metabolism	1.58716	0.0489793	1.60508	0.0426907	1.55669	0.153471	1.59698	0.0656869
Pyruvate metabolism I: anaplerotic reactions, PEP	1.48654	0.00711985	1.48904	0.0123333	1.37756	0.0436199	1.43892	0.00859605
Lactose utilization	1.46736	0.0658303	1.45608	0.0480007	1.81989	0.226728	1.49483	0.0134233
Antibiotic targets in DNA processing	1.44969	0.0604097	1.41478	0.01619	1.36641	0.0885363	1.39255	0.0335857
Antibiotic targets in transcription	1.34247	0.0306093	1.37087	0.021849	1.41988	0.0502454	1.33299	0.0342424
Ribosomal proteins, single-copy	1.2939	0.0210794	1.16253	0.0807398	1.12737	0.0704079	1.21031	0.0606481
DNA repair, UvrABC system	1.25031	0.0586258	1.20254	0.026362	1.29823	0.0624549	1.14993	0.0234249
Galactose utilization	1.22394	0.0142631	1.2651	0.0374394	1.23791	0.0318503	1.30088	0.0205336
RNA processing and degradation, bacterial	1.17335	0.0679609	1.12902	0.0144038	1.22176	0.0323105	1.12888	0.0498464
DNA repair, bacterial	1.01537	0.0616529	1.05164	0.0211942	1.03649	0.0857901	1.1234	0.0176897
Pyridoxin (Vitamin B6) Biosynthesis	0.957253	0.0448929	0.940213	0.0189252	0.918537	0.0749152	0.939263	0.0231071
D-Galacturonate and D-Glucuronate Utilization	0.95313	0.032055	0.754756	0.021727	1.18749	0.22728	0.808713	0.020731
DNA Repair Base Excision	0.924759	0.054793	0.896393	0.0214378	0.95541	0.0145563	0.905838	0.0063413
Branched-Chain Amino Acid Biosynthesis	0.923754	0.0179148	1.08501	0.019235	0.864637	0.113945	1.06112	0.0104142
Type I restriction-modification systems	0.898593	0.205102	0.773756	0.119937	0.914858	0.17353	0.89926	0.0779707
Fermentations: Mixed acid	0.894224	0.0136395	0.998226	0.0312709	0.723948	0.229036	0.958979	0.0119802
Translation termination factors, bacterial	0.881453	0.0518527	0.901686	0.0565932	0.864506	0.0732225	0.894057	0.0058863

## Sheet: S16C
Supplementary Table S16A: Relative abundance of top 25 KEGG pathways in large intestine (LI) of sheep fed with and without moringa.
Pathway	A-CE-17%M: mean rel. freq. (%)	A-CE-17%M: std. dev. (%)	B-CE-17%M: mean rel. freq. (%)	B-CE-17%M: std. dev. (%)	C-FE-0%M: mean rel. freq. (%)	C-FE-0%M: std. dev. (%)	D-FE-0%M: mean rel. freq. (%)	D-FE-0%M: std. dev. (%)
K1000250 Alanine, aspartate and glutamate metabolism	0.553714	0.01404	0.550804	0.0067633	0.529274	0.0376382	0.536749	0.00459541
K1000260 Glycine, serine and threonine metabolism	2.05239	0.0778381	1.99345	0.0409231	1.90311	0.00628166	1.77561	0.044891
K1000280 Valine, leucine and isoleucine degradation	0.263497	0.00625541	0.280765	0.0181737	0.242835	0.00829515	0.248632	0.0151892
K1000290 Valine, leucine and isoleucine biosynthesis	1.70126	0.0389676	1.75855	0.0647352	1.74722	0.0292886	1.7179	0.0269723
K1000400 Phenylalanine, tyrosine and tryptophan biosynthesis	1.20432	0.0598924	1.26832	0.0381216	1.21503	0.0377499	1.20369	0.0123663
K1000960 Tropane, piperidine and pyridine alkaloid biosynthesis	0.0439369	0.0155996	0.0721371	0.00200498	0.0655406	0.00518423	0.0718396	0.00459474
Benzoate degradation via CoA ligation	0.0557126	0.00407998	0.0597219	0.0030246	0.0488364	0.0072313	0.0513631	0.00263709
beta-Lactam resistance	0.0833815	0.0144477	0.100403	0.00307238	0.0878579	0.00592466	0.0998125	0.0132734
Carbazole degradation	0.00119295	0.000853806	0.00173362	0.0024079	0.000841254	0.000815516	0.000874496	0.000603098
Fluorene degradation	0.00241333	0.00122202	0.00118657	0.000874313	0.000241528	0.000215303	0.00157058	0.00086927
K1000010 Glycolysis / Gluconeogenesis	3.89567	0.116664	3.85677	0.0350431	3.89276	0.0560655	3.85276	0.0430401
K1000020 Citrate cycle (TCA cycle)	1.76145	0.0155896	1.67377	0.0364093	1.64445	0.0570923	1.63216	0.0304045
K1000030 Pentose phosphate pathway	1.66347	0.0339236	1.62014	0.0298774	1.68098	0.00720092	1.65496	0.0114381
K1000040 Pentose and glucuronate interconversions	1.76641	0.0429765	1.62608	0.0169754	1.87029	0.0187807	1.6737	0.0238502
K1000051 Fructose and mannose metabolism	1.22199	0.0702916	1.15907	0.0475232	1.17541	0.00709987	1.12614	0.00874627
K1000052 Galactose metabolism	2.92584	0.0326552	2.887	0.0279271	3.0374	0.0305017	2.87348	0.0249887
K1000053 Ascorbate and aldarate metabolism	0.107325	0.00641661	0.120336	0.00677849	0.0900983	0.0142517	0.109633	0.00315809
K1000061 Fatty acid biosynthesis	0.677315	0.0267672	0.573931	0.0191932	0.685323	0.00617465	0.576804	0.00460223
K1000062 Fatty acid elongation	0.00323934	0.00212156	3.07612e-05	3.24679e-07	0.00498798	0.00237569	0.000170114	0.00020245
K1000071 Fatty acid degradation	0.593651	0.0268377	0.489648	0.0201266	0.574998	0.0430047	0.502725	0.012821
K1000100 Steroid biosynthesis	0.00763043	0.00172439	0.00849395	0.00378393	0.00675926	0.00102613	0.00480624	0.000456513
K1000120 Primary bile acid biosynthesis	0.0726465	0.00502159	0.0631119	0.0114634	0.0732902	0.00989387	0.0692353	0.0106546
K1000130 Ubiquinone and other terpenoid-quinone biosynthesis	0.253618	0.0187543	0.216554	0.0154121	0.239574	0.00503406	0.189507	0.0208893
K1000140 Steroid hormone biosynthesis	0.0898846	0.00217584	0.0658722	0.00659048	0.0644439	0.00406524	0.0653696	0.00416587
K1000190 Oxidative phosphorylation	1.85953	0.0815642	1.74814	0.0311015	1.72018	0.022083	1.6762	0.0259997
