# Supplementary material
Source: Research Square preprint supplement (doi:10.21203/rs.3.rs-9593000/v1)
Supplement: Supplementary file 10 [file 886ed1b69b82eff737e2c5ae.xlsx]

## Sheet: 9A
Supplementary Table 9A: List of major phyla present in the Forestomach (FS) of Sheep feed with 0 and 17%M. Multiple group comparison between three groups was done using Kruskal-Wallis test with > 0.95% CI in STAMP software.
Phylum	RUS_0%: mean rel. freq. (%)	RUS_0%: std. dev. (%)	RUS_17%: mean rel. freq. (%)	RUS_17%: std. dev. (%)	RUL_0%: mean rel. freq. (%)	RUL_0%: std. dev. (%)	RUL_17%: mean rel. freq. (%)	RUL_17%: std. dev. (%)	RET_0%: mean rel. freq. (%)	RET_0%: std. dev. (%)	RET_17%: mean rel. freq. (%)	RET_17%: std. dev. (%)	OM_0%: mean rel. freq. (%)	OM_0%: std. dev. (%)	OM_17%: mean rel. freq. (%)	OM_17%: std. dev. (%)	ABO_0%: mean rel. freq. (%)	ABO_0%: std. dev. (%)	ABO_17%: mean rel. freq. (%)	ABO_17%: std. dev. (%)
Bacteroidota	57.5019	1.32597	51.1185	1.52443	50.1793	2.07026	48.4515	0.843351	44.6005	3.15223	52.6996	0.379169	52.8523	7.69194	56.9652	0.992301	48.7292	4.76143	50.6581	1.40377
Bacillota	24.6274	0.847244	33.0147	1.28706	34.4016	1.2567	28.1917	0.870383	30.5023	2.14774	27.0035	0.952108	29.4203	6.74846	29.0625	0.60379	30.8247	0.532407	27.9146	2.01063
Pseudomonadota	5.27294	0.532176	4.64131	0.467625	4.35754	0.203332	8.5364	0.647898	7.55813	0.929431	7.96516	0.895998	5.13348	0.318609	3.63984	0.149241	5.40422	1.04583	6.46956	0.57725
Fibrobacterota	3.65203	0.0104587	2.15312	0.298585	1.96922	0.0365078	1.39117	0.247909	1.78963	0.133492	1.18943	0.0367461	2.86449	1.07345	2.8603	0.112807	2.04258	0.551553	1.93914	0.141917
Verrucomicrobiota	3.04759	0.0650669	2.89596	0.360308	3.1129	0.26485	7.54471	0.552602	3.38848	0.191802	5.75307	0.302046	2.27085	0.756487	2.00302	0.0877708	2.30855	0.454971	3.19892	0.638607
Spirochaetota	1.93548	0.0826064	1.88999	0.314146	1.76257	0.0370032	1.31839	0.111385	1.82564	0.0600011	1.01346	0.0192311	1.35928	0.356007	1.25599	0.0652263	1.45583	0.165637	1.31438	0.057677
Mycoplasmatota	1.11822	0.015504	1.1753	0.109537	0.957949	0.00738653	1.4615	0.120952	0.813393	0.0781655	1.28301	0.117475	0.93259	0.162718	1.10346	0.026056	0.820313	0.10321	1.08987	0.131425
Synergistota	0.465939	0.0729114	0.345333	0.0548956	0.73282	0.0562688	0.395498	0.0790067	0.596606	0.0318778	0.318751	0.0298739	0.370578	0.0635272	0.269302	0.016268	0.501498	0.133579	0.318113	0.0132107
Elusimicrobiota	0.356446	0.00618308	0.356703	0.074267	0.198974	0.0183559	0.285225	0.00699789	0.265664	0.0251677	0.282718	0.0462183	0.310616	0.0965105	0.39621	0.031377	0.26658	0.00436505	0.328205	0.0159469
Lentisphaerota	0.356443	0.00909312	0.106769	0.0188212	0.371997	0.033211	0.158796	0.00197711	0.344839	0.0538092	0.157493	0.0206297	0.244377	0.0800347	0.0615998	0.0116601	0.263072	0.0607705	0.0739162	0.0139442
Candidatus Saccharibacteria	0.318255	0.00464768	0.0552289	0.016153	0.207123	0.0163003	0.106701	0.0207039	0.159322	0.030277	0.0713468	0.0173822	0.366446	0.0470046	0.0592558	0.0142269	0.162579	0.0508563	0.0550892	0.0033186
Actinomycetota	0.260723	0.0448633	0.629074	0.161791	0.379614	0.0408276	0.223028	0.0167531	6.31047	1.02088	0.294157	0.0584525	2.49179	3.14715	0.730508	0.0519495	5.45807	2.68923	4.27998	1.21626
Others	1.08664		1.618		1.36842		1.93537		1.84497		1.96828		1.38288		1.59286		1.76286		2.3602
Bacillota:Bacteroidota	0.428289		0.645845		0.685573		0.581855		0.683901		0.512404		0.556651		0.510179		0.632572		0.551039

## Sheet: 9B
Supplementary Table 9B: List of major phyla present in the small Intestine (SI) of Sheep feed with 0 and 17%M. Multiple group comparison between three groups was done using Kruskal-Wallis test with > 0.95% CI in STAMP software.
Phylum	DUO_0%: mean rel. freq. (%)	DUO_0%: std. dev. (%)	DUO_17%: mean rel. freq. (%)	DUO_17%: std. dev. (%)	JEJ_0%: mean rel. freq. (%)	JEJ_0%: std. dev. (%)	JEJ_17%: mean rel. freq. (%)	JEJ_17%: std. dev. (%)	IL_0%: mean rel. freq. (%)	IL_0%: std. dev. (%)	IL_17%: mean rel. freq. (%)	IL_17%: std. dev. (%)
Pseudomonadota	29.1349	0.969005	39.1104	4.77885	13.7396	1.81237	73.2692	0.355819	1.86177	1.02513	5.53607	0.796007
Bacillota	42.3773	3.05437	26.4281	1.44948	65.6411	1.50034	10.7792	0.0518673	77.3312	3.76753	69.8424	2.87644
Actinomycetota	5.90986	0.904089	6.32109	2.00368	13.2985	3.23178	3.16666	0.159364	16.7217	1.11294	3.38366	0.294432
Bacteroidota	20.4088	2.40087	21.179	1.14975	2.16352	0.125218	7.19303	0.279845	0.414834	0.205348	1.11648	0.290603
Verrucomicrobiota	0.425991	0.0729367	2.79984	0.0984931	2.12234	1.27141	3.72723	0.79719	1.65114	1.06106	15.2641	0.0831334
Candidatus Saccharibacteria	0.380165	0.171542	0.391405	0.14031	0.910621	0.533765	0.43133	0.011986	0.813661	0.125347	1.51642	0.658376
Cyanobacteriota	0.126421	0.00552674	0.891368	0.191635	0.268784	0.0317469	0.447585	0.0481392	0.0830576	0.0108432	0.552389	0.181501
Mycoplasmatota	0.0415125	0.0186887	0.346191	0.00367535	0.0632814	0.0184956	0.0619035	0.0249605	0.094768	0.000867222	0.0462155	0.0336064
Synergistota	0.0882069	0.0561111	0.14786	0.00922279	0.0688077	0.0207637	0.0321687	0.00677038	0.0320828	0.0268782	0.0486884	0.0366011
Lentisphaerota	0.0716913	0.0181982	0.0583601	0.00361902	1.13946	0.798653	0.0845248	0.0083299	0.451199	0.14933	0.180932	0.0366954
Balneolota	0.0630547	0.021821	0.0175878	0.00687761	0.196284	0.100158	0.00489861	0.00258967	0.137005	0.00493768	0.0251367	0.00533267
Others	0.972084		2.30883		0.38768		0.802286		0.407645		2.48743
Bacillota:Bacteroidota	2.07642	1.27219	1.24784	1.26069	30.34	11.9818	1.49856	0.185343	186.415	18.3471	62.556	9.89814

## Sheet: 9C
Supplementary Table 9C: List of major phyla present in the large intestine (LI) of Sheep feed with 0 and 17%M. Multiple group comparison between three groups was done using Kruskal-Wallis test with > 0.95% CI in STAMP software.
Phylum	CE_0%: mean rel. freq. (%)	CE_0%: std. dev. (%)	CE_17%: mean rel. freq. (%)	CE_17%: std. dev. (%)	FE_0%: mean rel. freq. (%)	FE_0%: std. dev. (%)	FE_17%: mean rel. freq. (%)	FE_17%: std. dev. (%)
Bacillota	66.1746	10.2221	67.4423	1.7139	67.2371	8.72634	68.4603	0.622112
Bacteroidota	20.2515	7.60236	20.5587	1.14794	19.422	6.8703	19.4684	1.61175
Verrucomicrobiota	3.53253	1.72877	1.53288	0.227321	3.75638	1.79991	1.00317	0.050008
Synergistota	1.84876	0.0676088	1.69657	0.139561	1.23244	0.180343	1.07617	0.126057
Pseudomonadota	1.76344	0.333794	2.456	0.386735	1.80974	0.409317	3.8437	1.40212
Actinomycetota	1.5003	0.683541	0.784395	0.118098	1.26979	0.947552	0.614128	0.163672
Lentisphaerota	1.23476	0.804718	0.0286565	0.00368615	1.14541	0.544047	0.0278153	0.000442887
Mycoplasmatota	0.838055	0.431227	1.79043	0.378633	0.862531	0.173302	1.59272	0.0444707
Candidatus Saccharibacteria	0.757421	0.588399	0.175348	0.0530079	0.763758	0.585868	0.356851	0.0843397
Fibrobacterota	0.00418832	0.00299405	0.152454	0.026644	0.00376245	0.00172941	0.186208	0.0179918
Spirochaetota	0.612583	0.422964	0.844842	0.153763	0.78274	0.383207	1.04969	0.0834424
Campylobacterota	0.330595	0.0320725	0.158239	0.0176621	0.576505	0.211296	0.126525	0.0106296
Others	1.15129		2.3792		1.13785		2.19437
Bacillota:Bacteroidota	3.26764		3.28048		3.46191		3.51648
