# Supplementary material
Source: Research Square preprint supplement (doi:10.21203/rs.3.rs-9593000/v1)
Supplement: Supplementary file 11 [file 7f18e91ec18e50422bbfed38.docx]

**Supplementary Fig. S1** Depicting rarefaction curves of 16S amplicon data analysis. The graph showing relationship between sequencing depth (number of reads) and observed bacterial genera for each metagenomic sample. Before plotting the curves, data was normalized (rarefied) to minimum library size using MicrobiomeAnalyst. Each curve represents a single sample, with different colors indicating distinct sample groups or treatments. (A) organs and (B) three major intestinal tracts and two dietary treatments. The x-axis denotes the number of sequences randomly sampled, while the y-axis represents the number of observed genera. Curves that reach a plateau indicate sufficient sequencing depth to capture most of the microbial diversity present in the sample. FS; forestomach, SI; small intestine, and LI; large intestine.

**Supplementary Fig. S2** Depicting rarefaction curves of shotgun metagenome data analysis. The graph showing relationship between sequencing depth (number of reads) and observed bacterial genera for each metagenomic sample. Before plotting the curves, data was normalized (rarefied) to minimum library size using MicrobiomeAnalyst. Each curve represents a single sample, with different colors indicating distinct sample groups (organs in GIT). The x-axis denotes the number of sequences randomly sampled, while the y-axis represents the number of observed genera. Curves that reach a plateau indicate sufficient sequencing depth to capture most of the microbial diversity present in the sample.

**Supplementary Fig. S3** Depicting rarefaction curves from 18S data analysis. The graph showing relationship between sequencing depth (number of reads) and observed genus of protozoa for each metagenomic sample. Before plotting the curves, data was normalized (rarefied) to minimum library size using MicrobiomeAnalyst. Each curve represents a single sample, with different colors indicating distinct feeding treatments. The x-axis denotes the number of sequences randomly sampled, while the y-axis represents the number of observed genera. Curves that reach a plateau indicate sufficient sequencing depth to capture most of the microbial diversity present in the sample, while those not reaching, more data required for those samples.

**Supplementary Fig. S4** Depicting rarefaction curves of ITS data analysis. The graph showing relationship between sequencing depth (number of reads) and observed genus of anaerobic fungi for each metagenomic sample. Before plotting the curves, data was normalized (rarefied) to minimum library size using MicrobiomeAnalyst. Each curve represents a single sample, with different colors indicating distinct organs. The x-axis denotes the number of sequences randomly sampled, while the y-axis represents the number of observed genera. Curves that reach a plateau indicate sufficient sequencing depth to capture most of the microbial diversity present in the sample, while those not reaching, more data required for those samples.

**Supplementary Fig. S5** Depicting results of differential abundance of various phyla using 16S amplicon-based data analysis in three major sections of lamb’s GIT. Taxonomy was assigned using 16S metatgenomics workflow of Illumina BaseSpace and ribosomal database project (RDP) database v.2.14 as a reference and then data was normalized (rarefied) to minimum library size using MicrobiomeAnalyst. (A) a stacked bar chart showing abundance of top 10 phyla in three major parts of lamb’s GIT as well as between 0%M and 17%M, and (B) core microbiome-based analysis showing presence/absence of different phyla in three major sections of lamb’s GIT. All analysis were performed in MicrobiomeAnalyst. FS; forestomach, SI; small intestine, and LI; large intestine.

**Supplementary Fig. S6** Extended error bar plots showing statistically significant (p <0.05) differentially abundant genera in FS and LI using 16S amplicon data analysis. (A) FS and (B) LI. For data analysis, taxonomy was assigned using 16S metagenomics workflow of Illumina BaseSpace and ribosomal database project (RDP) database v.2.14 as a reference and then data was normalized (rarefied) to minimum library size using MicrobiomeAnalyst. Statistical analysis was performed in STAMP with two group comparison, two-sided Welch’s t-test with Bonferrini multiple test correction and p-value threshold ≤ 0.05.

**Supplementary Fig. S7** A core microbiome-based (relative abundance >0.01% and prevalence in at least 10%) of the samples analysis showing presence/absence of different phyla in different organs of lamb’s GIT. All analysis were performed in MicrobiomeAnalyst. FS; forestomach, SI; small intestine, and LI; large intestine.

**Supplementary Fig. S8** Differential abundance of various phylain different organs of lamb’s forestomach.(A) a stacked bar chart showing relative abundance of top 10 phyla and (B) core microbiome (relative abundance >0.01% and prevalence in at least 10% of the samples) base presence/absence of various phyla. All analysis were performed in MicrobiomeAnalyst.

**Supplementary Fig. S9** Differential abundance of various phylain different organs of lamb’s small intestine.(A) a stacked bar chart showing relative abundance of top 10 phyla and (B) core microbiome (relative abundance >0.01% and prevalence in at least 10% of the samples) base presence/absence of various phyla. All analysis were performed in MicrobiomeAnalyst.

**Supplementary Fig. S10** Differential abundance of various phylain different organs of lamb’s large intestine.(A) a stacked bar chart showing relative abundance of top 10 phyla and (B) core microbiome (relative abundance >0.01% and prevalence in at least 10% of the samples) base presence/absence of various phyla. All analysis were performed in MicrobiomeAnalyst.

**Supplementary Fig. S11** A core microbiome (relative abundance >0.01% and prevalence in at least 10% of the samples) base presence/absence of various genera in FS (A), SI (B), and LI (C) of Lamb’s GIT. All analysis were performed in MicrobiomeAnalyst.

**Supplementary Fig. S12** A split violine plots showing differential abundance of various genera between 0%M and 17%M fed lamb in fecal samples. The plots were generated using SRplots where bacterial genera with relative abundance ≥1.5% were plotted.

**Supplementary Fig. S13** Depicting results of shotgun data analysis for three major sections of lamb’s GIT after assigning taxonomy using AnnoTree database and DIAMOND+MEGAN pipeline. Then, data was normalized (rarefied) to minimum library size using MicrobiomeAnalyst. (A) 2D and (B) 3D NMDS plots depicting differences in the bacteriome composition between between two different diets i.e. 17% Morinaga (17%M) and without it (0%M) in the FS, SI, and LI of lamb’s GIT. (C)-(F), alpha diversity indices. G: Differential abundance of top 20 phyla in FS, SI and LI. FS; forestomach, SI; small intestine, and LI; large intestine.

**Supplementary Fig. S14** Depicting results of shotgun data analysis for individual organs in lamb’s GIT after assigning taxonomy using AnnoTree database and DIAMOND+MEGAN pipeline. Then, data was normalized (rarefied) to minimum library size using MicrobiomeAnalyst. (A) 2D and (B) 3D NMDS plots depicting differences in the bacteriome composition between between two different diets i.e. 17% Morinaga (17%M) and without it (0%M) in the FS, SI, and LI of lamb’s GIT. (C)-(F), alpha diversity indices. G: top 10 abundant phyla within individual GIT site (organ) of FS. FS; forestomach, SI; small intestine, and LI; large intestine.

**Supplementary Fig. S15** An extended error bar plot showing differentially abundant functional pathways in FS, SI and LI using shotgun data analysis. For data analysis, pathways were assigned using SEED database and DIAMOND+MEGAN pipeline. Then, data was normalized (rarefied) to minimum library size using MicrobiomeAnalyst. Statistical analysis was performed in STAMP with two group comparison, two-sided Welch’s t-test with Bonferrini multiple test correction and p-value threshold ≤ 0.05, and graph was plotted using GraphPad prism.

**Supplementary Fig. S16** Extended error bar plots showing statistically significant (p <0.05) differentially abundant enzymes and pathways in SI using shotgun metagenome data analysis. (A) SEED level 4, (B) EC and (C) KEGG pathways. Statistical analysis was performed in STAMP with two group comparison, two-sided Welch’s t-test with Bonferrini multiple test correction and p-value threshold ≤ 0.05.

**Supplementary Fig. S17** A stacked bar chart showing relative abundance of top 10 genera of ciliated protozoa in different organs of lamb’s large intestine.The taxonomy was assigned using Protist Ribosomal Reference (PR2) database v.5.0.0 then data was normalized (rarefied) to minimum library size using MicrobiomeAnalyst.

**Supplementary Fig. S18** Depicting results of 18S data analysis for individual organs in forestomach of lamb’s GIT after assigning taxonomy using Protist Ribosomal Reference (PR2) database v.5.0.0. Then, data was normalized (rarefied) to minimum library size using MicrobiomeAnalyst. (A) 2D and (B) 3D PCoA plots depicting differences in the protozoal composition between two different diets i.e. 17% Morinaga (17%M) and without it (0%M) in the FS of lamb’s GIT. FS; forestomach.

**Supplementary Fig. S19** Depicting results of 18S data analysis for individual organs in forestomach of lamb fed with 17% moringa (0%M) and without moringa (0%M) after assigning taxonomy using Protist Ribosomal Reference (PR2) database v.5.0.0. Then, data was normalized (rarefied) to minimum library size using MicrobiomeAnalyst. (A)-(D) alpha diversity calculated using observed, chao1, shannon and simpson indices using MicrobiomeAnalyst.
