# Supplementary material
Source: Research Square preprint supplement (doi:10.21203/rs.3.rs-9593000/v1)
Supplement: Supplementary file 11 [file 8910c7487b029409f0a4c322.xlsx]

## Sheet: RUM
Supplementary Table S17A: Relative abundance of cilliates in the rumen (RUM) of sheep fed with and without moringa.
Genus	A_RUM-0%: mean rel. freq. (%)	A_RUM-0%: std. dev. (%)	B_RUM-17%: mean rel. freq. (%)	B_RUM-17%: std. dev. (%)	p-values	p-values (corrected)	Difference between means	Fold change
Eremoplastron	25.9758	6.93709	1.59914	0.0954032	0.0381657	4.84704	24.3767	16.2436
Entodinium_1	11.9621	2.76414	2.56684	0.341111	0.0388784	4.93756	9.39524	4.66024
Enoploplastron	11.1268	0.615436	1.03663	0.110269	0.00139674	0.177386	10.0901	10.7336
Polyplastron	9.15543	1.81457	27.0222	1.77966	0.000576008	0.073153	-17.8668	2.95149
Isotricha	8.54343	1.23395	9.83171	0.330495	0.275116	34.9398	-1.28828	1.15079
Entodinium	8.0875	1.50824	9.70441	1.0709	0.290766	36.9272	-1.61691	1.19993
Trichostomatia_XX	6.87704	0.368132	3.19152	0.535769	0.00215085	0.273158	3.68552	2.15478
Dasytricha	5.63147	1.06258	5.79515	0.556691	0.859231	109.122	-0.163679	1.02906
Ophryoscolecidae_1_X	5.055	1.08796	0.170023	0.0323157	0.0238312	3.02656	4.88498	29.7313
Isotrichidae_2_X	2.99866	0.505047	0.124768	0.0059813	0.0150827	1.9155	2.87389	24.0339
Ostracodinium	1.36314	0.0432684	0.125614	0.0164459	0.000135531	0.0172125	1.23753	10.8519
Epidinium	1.31281	0.244091	20.0145	0.400886	4.81111e-06	0.000611011	-18.7017	15.2455
Diploplastron	0.68855	0.0606948	13.999	0.306501	0.000161176	0.0204693	-13.3104	20.3311
Others	0.354848		0.200475
Eodinium	0.340891	0.0711172	3.63096	0.294765	0.00262336	0.333166	-3.29007	10.6514
Metadinium	0.229235	0.0140656	0.450433	0.0644567	0.0348568	4.42682	-0.221199	1.96494
Diplodinium	0.220776	0.00576816	0.0173406	0.0015825	0.000166971	0.0212054	0.203435	12.7317
Ophryoscolex	0.0765525	0.0110775	0.519373	0.00727657	5.56911e-06	0.000707277	-0.44282	6.78453

## Sheet: RE
Supplementary Table S17B: Relative abundance of cilliates in reticulum (RE) of sheep fed with and without moringa.
Genus	C_RE-0%: mean rel. freq. (%)	C_RE-0%: std. dev. (%)	D_RE-17%: mean rel. freq. (%)	D_RE-17%: std. dev. (%)	p-values	p-values (corrected)	Difference between means	Fold change
Eremoplastron	51.9572	1.45788	1.28067	0.0768615	0.0181521	2.30532	50.6765	40.5703
Polyplastron	15.1929	0.308325	31.8458	0.790984	0.000168318	0.0213763	-16.6529	2.0961
Enoploplastron	11.0527	0.18398	0.740572	0.0452212	0.00914849	1.16186	10.3122	14.9246
Isotricha	6.26356	0.720059	14.5657	0.0761742	0.0538548	6.83955	-8.30214	2.32547
Epidinium	3.32179	0.10785	13.9288	0.41256	0.000216644	0.0275137	-10.607	4.19315
Trichostomatia_XX	2.48373	0.0602692	2.56261	0.30112	0.751552	95.4471	-0.0788787	1.03176
Eodinium	1.96287	0.0558284	4.21589	0.0202571	0.0102993	1.30801	-2.25301	2.14781
Entodinium	1.567	0.0913555	9.69426	0.650815	0.00237012	0.301005	-8.12725	6.1865
Diploplastron	1.31197	0.0710543	10.6564	0.367252	0.000367804	0.0467111	-9.34448	8.1225
Ostracodinium	1.26692	0.010785	0.154374	0.021164	1.00735e-05	0.00127933	1.11255	8.20685
Entodinium_1	1.01506	0.087549	2.83329	0.232527	0.00286981	0.364466	-1.81823	2.79125
Dasytricha	1.00364	0.233464	6.29253	0.296006	0.00132683	0.168507	-5.28889	6.2697
Isotrichidae_2_X	0.621725	0.133227	0.153528	0.0156774	0.174356	22.1432	0.468197	4.04959
Ophryoscolecidae_1_X	0.449164	0.11927	0.214855	0.00239252	0.299695	38.0613	0.23431	2.09055
Others	0.357809		0.519796
Metadinium	0.171926	0.0323551	0.340891	0.00467155	0.117386	14.9081	-0.168965	1.98278

## Sheet: OM
Supplementary Table S17C: Relative abundance of cilliates in the omasum (OM) of sheep fed with and without moringa.
Genus	E_OM-0%: mean rel. freq. (%)	E_OM-0%: std. dev. (%)	F_OM-17%: mean rel. freq. (%)	F_OM-17%: std. dev. (%)	p-values	p-values (corrected)	Difference between means	Fold change
Eremoplastron	46.4942	0.525928	1.45915	0.0108161	0.00742164	0.942549	45.0351	31.8639
Polyplastron	16.8208	0.0735919	42.6402	1.66088	0.00199308	0.253121	-25.8193	2.53496
Enoploplastron	11.3497	0.829812	1.19862	0.115132	0.0499049	6.33793	10.151	9.46895
Isotricha	4.43201	0.131958	4.42482	0.372044	0.982156	124.734	0.00719002	1.00162
Trichostomatia_XX	2.92591	0.272798	2.79861	0.111894	0.722786	91.7938	0.127306	1.04549
Entodinium	2.85359	0.125614	7.54444	0.741421	0.00929336	1.18026	-4.69085	2.64384
Dasytricha	2.29531	0.388261	1.1927	0.0657427	0.211301	26.8352	1.10261	1.92447
Epidinium	2.26422	0.249324	17.4819	0.242278	0.00046537	0.059102	-15.2177	7.72093
Eodinium	2.18428	0.0171292	5.50205	0.22348	0.00204658	0.259916	-3.31777	2.51893
Entodinium_1	2.15954	0.228389	1.5412	0.172412	0.171407	21.7687	0.618341	1.40121
Isotrichidae_2_X	1.84234	0.296905	0.0262224	0.009626	0.103014	13.0827	1.81611	70.2581
Diploplastron	1.62346	0.0818393	12.967	0.260528	3.61663e-05	0.00459312	-11.3435	7.98723
Ostracodinium	1.39381	0.0869146	0.184826	0.0147364	0.0429038	5.44878	1.20898	7.54119
Ophryoscolecidae_1_X	1.0969	0.0425057	0.0917784	0.0135209	0.020468	2.59944	1.00512	11.9516
Others	0.169388		0.565474
Metadinium	0.0945276	0.00824737	0.381071	0.0597861	0.0181304	2.30256	-0.286543	4.03132

## Sheet: ABO
Supplementary Table S17D: Relative abundance of cilliates in the abomasum (ABO) of sheep fed with and without moringa.
Genus	G_ABO-0%: mean rel. freq. (%)	G_ABO-0%: std. dev. (%)	H_ABO-17%: mean rel. freq. (%)	H_ABO-17%: std. dev. (%)	p-values	p-values (corrected)	Difference between means	Fold change
Eremoplastron	53.1765	1.84482	1.27432	0.0558892	0.000624687	0.0793352	51.9022	41.7292
Polyplastron	16.4385	1.8776	48.1773	5.92558	0.0111294	1.41344	-31.7388	2.93076
Enoploplastron	11.7671	0.234901	0.668671	0.199188	1.19444e-06	0.000151693	11.0984	17.5977
Epidinium	3.07352	0.149579	14.6469	0.68299	0.00113359	0.143966	-11.5734	4.76552
Trichostomatia_XX	2.80368	0.184786	2.46744	0.341865	0.306467	38.9213	0.336239	1.13627
Eodinium	2.32068	0.280995	6.20541	0.732809	0.00966705	1.22772	-3.88472	2.67396
Entodinium	2.19761	0.222743	6.91045	0.747971	0.00803106	1.01994	-4.71284	3.14453
Ostracodinium	1.54162	0.213512	0.199206	0.0152611	0.0120877	1.53514	1.34242	7.73885
Entodinium_1	1.49045	0.108667	1.63975	0.347103	0.611708	77.6869	-0.149299	1.10017
Diploplastron	1.4177	0.357545	11.0354	0.363966	1.18015e-05	0.00149879	-9.6177	7.78401
Dasytricha	0.978688	0.0797804	1.91973	1.35814	0.430521	54.6762	-0.941046	1.96154
Isotricha	0.828544	0.0976969	3.9101	3.49945	0.339104	43.0662	-3.08156	4.71924
Isotrichidae_2_X	0.7964	0.263577	0.0452548	0.0344276	0.0541835	6.8813	0.751145	17.5981
Ophryoscolecidae_1_X	0.737611	0.060889	0.139571	0.0327118	0.00105771	0.134329	0.59804	5.28485
Others	0.301558		0.485115					1.6087
Metadinium	0.129843	0.0209346	0.275335	0.0244942	0.00334785	0.425177	-0.145492	2.12052
