# Supplementary material
Source: Research Square preprint supplement (doi:10.21203/rs.3.rs-9593000/v1)
Supplement: Supplementary file 12 [file 8a737b206533f11c658bf16a.xlsx]

## Sheet: Sheet1
Supplementary Table S4: Result of pairwise PERMANOVA analysis of 16S ampliocn data. The multi-testing adjustment is based on Benjamini-Hochberg procedure procedure (FDR). Analysis was performed in MicrobiomeAnalyst.
[PERMANOVA; F-value: 22.188, R2 0.71143, p=0.001 and MiRKAT R2 0.40894, p=3.7521e-05, KRV: 0.0024073]
Pair	F-value	R-squared	P-value	FDR
A_FS-0%M vs B_FS-17%M	24.674	0.49672	0.001	0.0016667
C_SI-0%M vs D_SI-17%M	3.1781	0.22416	0.015	0.015
E_LI-0%M vs F_LI-17%M	9.2457	0.50673	0.001	0.0016667
