# Supplementary material
Source: Research Square preprint supplement (doi:10.21203/rs.3.rs-9593000/v1)
Supplement: Supplementary file 13 [file 9e4eb891c9c71f678a367ca3.xlsx]

## Sheet: Supplementary Table S8
Supplementary Table S8: Values of different alpha diversity indices calculated by 16S amplicon data analysis using MicrobiomeAnalyst server.
GI Site	Sample_id	Shannon	Simpson	Chao1	Observed	ACE
A_FS-0%M	A2_RUSa	4.16718	0.961909	658.75	526	631.789
A_FS-0%M	A2_RUSb	3.98984	0.957823	498.762	438	516.175
A_FS-0%M	A2_RULa	4.33867	0.968643	685.094	550	683.022
A_FS-0%M	A2_RULb	4.23195	0.964359	605.468	514	605.674
A_FS-0%M	A2_RE	4.35791	0.970647	665	542	661.697
A_FS-0%M	A2_REa	4.43202	0.97192	748.833	595	741.825
A_FS-0%M	A2_REb	4.15377	0.963897	623.397	527	624.171
A_FS-0%M	A2_OM	4.10438	0.961652	571.138	477	583.013
A_FS-0%M	A2_OMa	4.05452	0.959432	586.019	475	579.178
A_FS-0%M	A2_OMb	4.44445	0.975233	755.235	613	777.412
A_FS-0%M	A2_ABO	4.28719	0.968498	682.264	564	687.659
A_FS-0%M	A2_ABOa	4.32461	0.970557	766.182	590	745.44
A_FS-0%M	A2_ABOb	4.30717	0.968054	692.088	563	694.32
B_FS-17%M	A1_RUS	3.86669	0.944497	609.429	462	612.42
B_FS-17%M	A1_RUSa	3.82478	0.928403	532.333	469	552.74
B_FS-17%M	A1_RUSb	3.91123	0.943181	525.905	452	537.451
B_FS-17%M	A1_RUL	3.65966	0.94153	522.246	443	537.092
B_FS-17%M	A1_RULb	3.64878	0.937983	579.288	435	570.544
B_FS-17%M	A1_RE	3.67134	0.93688	521.128	420	510.11
B_FS-17%M	A1_REa	3.71942	0.938994	555.348	462	574.434
B_FS-17%M	A1_REb	3.68609	0.936951	489.818	425	507.715
B_FS-17%M	A1_OM	3.71325	0.926001	564.255	432	548.1
B_FS-17%M	A1_OMa	3.80252	0.931736	521.472	439	515.912
B_FS-17%M	A1_OMb	3.81725	0.934884	630.393	476	612.549
B_FS-17%M	A1_ABO	3.75423	0.935765	560.82	432	552.663
B_FS-17%M	A1_ABOa	3.76871	0.932052	578.175	455	575.653
B_FS-17%M	A1_ABOb	3.92626	0.939361	646.068	531	652.744
C_SI-0%M	A2_DUOa	3.54866	0.887947	711.493	548	744.831
C_SI-0%M	A2_DUOb	3.44884	0.894831	709.154	511	727.204
C_SI-0%M	A2_JEJ	2.914	0.870269	514.519	371	532.426
C_SI-0%M	A2_JEJb	2.71587	0.840959	508.514	423	526.206
C_SI-0%M	A2_IL	3.45263	0.931807	422.547	388	431.741
C_SI-0%M	A2_ILb	3.59172	0.944294	495.5	413	503.41
D_SI-17%M	A1_DUO	3.42787	0.888613	610.944	472	592.674
D_SI-17%M	A1_DUOa	3.77587	0.941211	544.591	440	571.902
D_SI-17%M	A1_JEJ	2.18299	0.649988	509.688	426	515.518
D_SI-17%M	A1_JEJb	2.48722	0.774379	503.558	359	486.294
D_SI-17%M	A1_IL	3.12951	0.904614	564.467	395	539.618
D_SI-17%M	A1_ILa	3.02593	0.901306	419.517	352	431.559
D_SI-17%M	A1_ILb	3.11579	0.912426	404.938	327	407.157
E_LI-0%M	A2_CE	4.62006	0.978809	736.111	609	759.293
E_LI-0%M	A2_CEa	4.72971	0.982196	756.507	631	747.119
E_LI-0%M	A2_CEb	4.69184	0.981242	703.342	603	701.292
E_LI-0%M	A2_FEa	4.15654	0.967014	532.245	448	533.831
E_LI-0%M	A2_FEb	4.30129	0.972545	565.609	477	576.07
F_LI-17%M	A1_CE	4.52305	0.979779	615.887	512	617.952
F_LI-17%M	A1_CEa	4.5217	0.980192	613.018	504	603.341
F_LI-17%M	A1_CEb	4.61979	0.982028	663.328	548	665.595
F_LI-17%M	A1_FE	4.54852	0.980912	605.38	524	615.98
F_LI-17%M	A1_FEa	4.53683	0.980452	620.483	519	619.514
F_LI-17%M	A1_FEb	4.65167	0.982353	685.424	568	681.379
