# Supplementary material
Source: Research Square preprint supplement (doi:10.21203/rs.3.rs-9593000/v1)
Supplement: Supplementary file 14 [file c3cff7ca588c784871a9260e.xlsx]

## Sheet: Sheet1
Supplementary Table S1. Ingredients and nutrient composition of concentrate mixture and fodder mixture and proximate composition of whole (leaf+twig) Moringa oleifera.
Ingredients	Proportion	Nutrient composition(%)
		CP	TDN
Concentrate mixture
Maize grains	15	11	90
Bajra grains	20	10	80
Wheat bran	15	10	75
Guar Korma	15	45	70
Groundnut Cake	7	42	70
MLM	17	24	70
Molasses	5	0	90
Mineral mixture	4	0	0
Salt	2	0	0
Fodder mixture
Masoor straw	50	5	50
Prosopis cineraria	25	18	55
Gual phalgati	25	12	55
TMR – Fodder mix (60 parts) + concentrate mix (40 parts)
CP-Crude Protein; TDN-Total Digestible Nutrients; MLM- Moringa Leaf Meal; TMR-Total Mixed Ration.
Proximate composition of whole (leaf+twig) Moringa oleifera.
	CP (%)	Silica (%)	ADF (%)	NDF (%)	Ca (%)	P (%)
Leaf lamina	26.53	2.2	17.6	20	3.22	0.105
Leaf petiole	12.91	2.4	47	47.8	3.234	0.085
Average	19.72	2.3	32.3	33.9	3.227	0.095
CP; Crude protein, ADF; Acid-detergent fiber, NDF; Neutral Detergent Fiber.
