# Supplementary material
Source: Research Square preprint supplement (doi:10.21203/rs.3.rs-9593000/v1)
Supplement: Supplementary file 15 [file d0f085505e945c1f0f3cc64c.xlsx]

## Sheet: Shotgun
Supplementary Table S3: Number of reads generated per sample uisng shotgun libtrary sequencing.
Sample	# Reads
A1-ABO	1057841
A1-ABOa	1271252
A1-ABOb	1280151		Min	506107
A1-CE	1516060		Max	6629923
A1-CEa	1194723		Total	151925382
A1-Ceb	1319404		Total Million	151.93
A1-DUO	1030030		Per Site Per animal	7.6
A1-DUOa	1145709
A1-DUOb	1174635
A1-FE	1277113
A1-FEa	2769594
A1-FEb	1285277
A1-IL	1717184
A1-Ila	1314629
A1-Ilb	1210125
A1-JEJ	1131714
A1-JEJa	1677796
A1-JEJb	1094082
A1-OM	1252002
A1-Oma	1254443
A1-Omb	1344155
A1-RE	1083681
A1-Rea	1343263
A1-Reb	815691
A1-RuL	1512410
A1-RuLa	1198993
A1-RuLb	1173390
A1-RuS	1065250
A1-RuSa	1079188
A1-RuSb	1247645
A2-ABO	1249418
A2-ABOa	1216821
A2-ABO-b	6629923
A2-CE	1611428
A2-CEa	952172
A2-CE-b	962046
A2-DUO	1555923
A2-DUOa	1149694
A2-DUO-b	1362032
A2-FE	1528807
A2-FEa	650079
A2-FE-b	1263198
A2-IL	1267210
A2-ILa	685779
A2-IL-b	1114896
A2-JEJ	1461117
A2-JeJ-a	1494261
A2-JEJ-b	1109532
A2-OM	983477
A2-OMa	862916
A2-OMb	2572690
A2-RE	1729162
A2-REa	1063582
A2-RE-b	1170486
A2-Rua	778594
A2-RuL	958498
A2-RuLb	1072257
A2-RuS	1128466
A2-RuSb	1236111
A2-Sa	913740
A3-ABO	1525020
A3-ABO-a	1410982
A3-ABO-b	1320613
A3-CE	1375059
A3-CE-a	1516334
A3-CEb	1285289
A3-DUO	717519
A3-DUO-a	1173824
A3-DUO-b	1081746
A3-FE	1528522
A3-FEa	1712634
A3-FE-b	2929947
A3-IL	1354456
A3-Ila	1468591
A3-ILb	1392816
A3-JEJ	1206878
A3-JEJ-a	1321836
A3-JEJ-b	1021380
A3-OM	787159
A3-OM-a	1437659
A3-OM-b	988195
A3-RE	1347324
A3-RE-a	1230224
A3-RE-b	900558
A3-RuL	870312
A3-Ru-La	1183788
A3-RuLb	1254223
A3-RuS	718966
A3-Ru-Sa	1482650
A3-RuSb	1222924
A4-ABO	1132213
A4-ABOa	1127571
A4-CE	1192319
A4-CEa	1536374
A4-CEb	883809
A4-DUO	1154748
A4-DUOa	1236631
A4-DUO-b	506107
A4-FE	1102988
A4-FEa	1506936
A4-FEb	1297259
A4-IL	822701
A4-Ila	1034676
A4-ILb	1037775
A4-JEJ	1259573
A4-JEJa	1466918
A4-JEJ-b	1110196
A4-OM	1058792
A4-OMa	1037550
A4-Omb	1206955
A4-RE	948946
A4-Rea	1227813
A4-REb	932897
A4-RuL	1186463
A4-RuLa	1119113
A4-RuLb	1187848
A4-RuS	1342510
A4-RuSa	901403
A4-RuSb	1027125

## Sheet: 16S
Supplementary Table S3: Number of reads generated per sample uisng 16S libtrary sequencing.
Sample	# Reads
A2-ABO-merged	114130
A2-JEJ-merged	160005
A2-FE-merged	76410		Min	74306
A2-OMb-merged	122600		Max	160005
A2-FEa-merged	74306		Total	6802111
A2-CEa-merged	75061		Total Million	6.80211
A2-CE-merged	89013
A2-ABOa-merged	92864
A2-RuSb-16S	100000
A2-RuSa-16S	100000
A2-RuS-16S	100000
A2-RuLb-16S	100000
A2-RuLa-16S	100000
A2-RuL-16S	100000
A2-REb-16S	98234
A2-REa-16S	100000
A2-RE-16S	100000
A2-OMb-16S	100000
A2-OMa-16S	100000
A2-OM-16S	100000
A2-JEJb-16S	100000
A2-JEJa-16S	100000
A2-JEJ-16S	100000
A2-ILb-16S	100000
A2-ILa-16S	100000
A2-IL-16S	100000
A2-FEb-16S	100000
A2-FEa-16S	100000
A2-FE-16S	100000
A2-DUOb-16S	100000
A2-DUOa-16S	100000
A2-DUO-16S	100000
A2-CEb-16S	100000
A2-CEa-16S	100000
A2-CE-16S	100000
A2-ABOb-16S	100000
A2-ABOa-16S	100000
A2-ABO-16S	100000
A1-RuSb-16S	100000
A1-RuSa-16S	100000
A1-RuS-16S	100000
A1-RuLb-16S	100000
A1-RuLa-16S	100000
A1-RuL-16S	100000
A1-REb-16S	100000
A1-REa-16S	100000
A1-RE-16S	100000
A1-OMb-16S	100000
A1-OMa-16S	100000
A1-OM-16S	100000
A1-JEJb-16S	100000
A1-JEJa-16S	99488
A1-JEJ-16S	100000
A1-ILb-16S	100000
A1-ILa-16S	100000
A1-IL-16S	100000
A1-FEb-16S	100000
A1-FEa-16S	100000
A1-FE-16S	100000
A1-DUOb-16S	100000
A1-DUOa-16S	100000
A1-DUO-16S	100000
A1-CEb-16S	100000
A1-CEa-16S	100000
A1-CE-16S	100000
A1-ABOb-16S	100000
A1-ABOa-16S	100000
A1-ABO-16S	100000

## Sheet: 18S
Supplementary Table S3: Number of reads generated per sample uisng shotgun libtrary sequencing.
Sample	# Reads
A1-ABO	116215
A1-ABOa	116215
A1-ABOb	116215		Min	32831
A1-CE	116215		Max	286882
A1-CEa	116215		Total	5160900
A1-CE-NEW	33279		Total Million	5.16
A1-FE	116215
A1FEa	116215
A1-FEb	116215
A1-OM	116215
A1-OMa	116215
A1-OMb	116215
A1-RE	116215
A1-REa	116215
A1-REb	116215
A1-RuL	116215
A1-RuLa	116215
A1-RuLb	116215
A1-RuS	116215
A1-RuSa	116215
A1-RuSb	116215
A2-ABO	116215
A2-ABOa	116215
A2-ABOb	116215
A2-CE	116215
A2-CEb	116215
A2-FE	116215
A2-FEb	116215
A2-FE-OLD	32831
A2-JEJa	116215
A2-OM	116215
A2-OMb	116215
A2-RE	116215
A2-REb	116215
A2-RUL	286882
A2-RULa	105513
A2-RuLa	116215
A2-RULb	205881
A2-RUS	140876
A2-RUSa	211857
A2-RuSa	116215
A2-RUSb	192471

## Sheet: ITS
Supplementary Table S3: Number of reads generated per sample uisng shotgun libtrary sequencing.
Sample	# Reads
A1-ABO	311007
A1-ABOa	224327
A1-ABOb	158765
A1-Cea	154156		Min	82600
A1-Ceb	239199		Max	381990
A1-OM	266367		Total	8383209
A1-OMa	319704		Total Million	8.38
A1-OMb	311097
A1-RE	279642
A1-REa	227912
A1-REb	330170
A1-RUL	364930
A1-RULa	182190
A1-RULb	299548
A1-RUS	325090
A1-RUSa	381990
A1-RUSb	300760
A2-ABO	184255
A2-ABOa	248685
A2-ABOb	230290
A2-Cea	263460
A2-Ceb	141481
A2-OM	131634
A2-OMa	161187
A2-OMb	307146
A2-RE	257444
A2-REa	172413
A2-REb	82600
A2-RUL	180355
A2-RULa	254788
A2-RULb	236733
A2-RUS	358428
A2-RUSa	264233
A2-RUSb	231223
