# Supplementary material
Source: Research Square preprint supplement (doi:10.21203/rs.3.rs-9593000/v1)
Supplement: Supplementary file 16 [file da4739cdd43758acb7808181.xlsx]

## Sheet: Sheet1
Supplementary Table S2. PCR reaction mixture and thermal cycling conditions for 16S, 18S (cilliates), and ITS1 (rumen anaerobic fungi) gene amplification.
Component	Target	16S	18S (cilliates)	ITS1 (rumen anaerobic fungi)
DNA		2.5 µL (5ng/µL)	2.5 µL (10ng/µL)	2.5 µL (20ng/µL)
Forward primer (#µM)		5 µL	5 µL	5 µL
Reverse primer (#µM)		5 µL	5 µL	5 µL
KAPA HiFi HotStart ReadyMix (2X)		12.5 µL	12.5 µL	12.5 µL*
Total		25.0 µL	25.0 µL	25.0 µL
* EmeraldAmp® GT PCR Master Mix was used
# For 16S, 18S and ITS1, the primer concentraton was 1µM, 10µM, and 25µM, respectively.
Thermal cycling conditions for 16S rDNA gene
Temperature °C	Time (seconds)	Cycles
95	180	1
95	30	25
55	30
72	30
72	300	1
Thermal cycling conditions for 18S (cilliates) gene
Temperature °C	Time (seconds)	Cycles
95	180	1
95	25	28
60	30
72	30
72	300	1
Thermal cycling conditions for ITS1 (rumen anaerobic fungi) gene
Temperature °C	Time (seconds)	Cycles
95	180	1
98	25	32
55	30
72	30
72	300	1
