# Supplementary material
Source: Research Square preprint supplement (doi:10.21203/rs.3.rs-9593000/v1)
Supplement: Supplementary file 17 [file dc5dd02fd42a5dad3a53cfdb.xlsx]

## Sheet: S7A
Supplementory Table S7A: List of 64 bacterial genera showed statistical significant differences between 0% and 17M moriga fed sheep's FS. Comparsion between two groups was done using two-sided Welch's t-test with > 0.95% CI and Boneferroni multiple test correction in STAMP software.
SampleID	A_FS-0%M: mean rel. freq. (%)	A_FS-0%M: std. dev. (%)	B_FS-17%M: mean rel. freq. (%)	B_FS-17%M: std. dev. (%)	p-values	p-values (corrected)	Difference between means	95.0% lower CI	95.0% upper CI	Fold change
Tractidigestivibacter	0.000682885	0.00197624	0.0356686	0.0216096	5.67e-05	0.0438076	-0.0349857	-0.0479637	-0.0220077	52.2322
Lachnobacterium	0.000512164	0.00102433	0.0204866	0.0102433	8.48e-06	0.00655295	-0.0199744	-0.026129	-0.0138198	40
Gimesia	0.0126334	0.0096484	0.396561	0.182728	3.97e-06	0.00306933	-0.383928	-0.493498	-0.274357	31.39
Botrimarina	0.00819462	0.00873186	0.238522	0.120719	1.09e-05	0.00843769	-0.230327	-0.302764	-0.15789	29.1071
Nautilia	0.00290226	0.00348205	0.0470093	0.0166131	1.97e-07	0.000152417	-0.0441071	-0.054185	-0.0340292	16.1975
Hominimerdicola	0.0322663	0.0165644	0.341686	0.0462238	1.13e-13	8.76e-11	-0.30942	-0.338162	-0.280678	10.5896
Succinivibrio	0.303372	0.16573	3.10097	1.61943	2.96e-05	0.0228922	-2.7976	-3.77074	-1.82445	10.2217
Aquipluma	0.00614597	0.0039451	0.0546918	0.0201548	6.66e-07	0.000514786	-0.0485458	-0.0607526	-0.036339	8.89881
Spongitalea	0.00273154	0.00367745	0.023779	0.0115917	1.35e-05	0.0104062	-0.0210475	-0.0281962	-0.0138988	8.70536
Selenomonas	0.35988	0.169546	2.96909	1.45281	1.97e-05	0.0152367	-2.60921	-3.48299	-1.73542	8.2502
Schwartzia	0.0390952	0.0258878	0.192427	0.0862129	1.74e-05	0.013428	-0.153332	-0.206337	-0.100328	4.92202
Sodaliphilus	0.288007	0.10081	1.30236	0.631782	5.88e-05	0.0454751	-1.01435	-1.3956	-0.633105	4.52197
Pseudoflavonifractor	0.00546308	0.00447146	0.0243278	0.0118444	5.45e-05	0.0421343	-0.0188647	-0.0262605	-0.0114689	4.45312
Lawsonibacter	0.132309	0.0561567	0.481068	0.163835	1.95e-06	0.00150499	-0.348759	-0.450301	-0.247217	3.63594
Ethanoligenens	0.0112676	0.00625875	0.0358515	0.0152732	4.82e-05	0.0372649	-0.0245839	-0.0341932	-0.0149745	3.18182
Roseimaritima	0.134528	0.0631844	0.351747	0.0938243	4.36e-07	0.000337097	-0.217218	-0.281463	-0.152974	2.61467
Ructibacterium	0.00819462	0.00513868	0.0204866	0.00619758	7.89e-06	0.00609529	-0.0122919	-0.0168204	-0.00776346	2.5
Coprococcus	0.571233	0.145661	1.33949	0.316167	2.44e-07	0.000188328	-0.768258	-0.96984	-0.566676	2.34491
Stieleria	0.0884336	0.0346972	0.206146	0.0599218	4.32e-06	0.0033429	-0.117712	-0.157348	-0.0780766	2.33108
Huintestinicola	0.0218523	0.0118967	0.0508506	0.013649	3.56e-06	0.00274842	-0.0289982	-0.0391627	-0.0188337	2.32701
Segatella	10.9255	1.89024	20.9038	1.90107	1.33e-13	1.03e-10	-9.97831	-11.477	-8.47957	1.91331
Anaeroplasma	0.679471	0.167524	1.24877	0.179703	4.88e-09	3.77e-06	-0.569295	-0.706896	-0.431693	1.83785
Prevotella	4.06419	0.819744	2.79056	0.372002	3.89e-05	0.0300754	1.27363	0.768234	1.77903	1.45641
Butyrivibrio	2.14187	0.505684	1.3265	0.26375	2.74e-05	0.0211967	0.815365	0.496162	1.13457	1.61467
Dysgonomonas	0.6863	0.136275	0.411926	0.0929024	2.04e-06	0.00157722	0.274374	0.182457	0.366291	1.66607
Bacteroides	0.878361	0.167478	0.337479	0.0926061	4.73e-10	3.66e-07	0.540882	0.4339	0.647864	2.60271
Anaerocolumna	0.0254375	0.00960298	0.00859704	0.00369924	8.62e-06	0.00666469	0.0168404	0.011041	0.0226399	2.95887
Campylobacter	0.120359	0.0503555	0.0406073	0.022963	3.1e-05	0.0239479	0.0797512	0.0486832	0.110819	2.96396
Ruminobacter	1.35587	0.56002	0.422535	0.0784237	2.02e-05	0.0156428	0.933333	0.610175	1.25649	3.20889
Lachnospira	0.158771	0.0417028	0.045546	0.018164	1.47e-08	1.14e-05	0.113225	0.087663	0.138787	3.48594
Mesosutterella	0.066752	0.0309491	0.0186574	0.0102629	3.72e-05	0.0287554	0.0480946	0.0296594	0.0665299	3.57778
Holdemania	0.198549	0.0922552	0.0550576	0.0237036	3.83e-05	0.0296388	0.143491	0.0893892	0.197593	3.6062
Saccharibacteria_genera_incertae_sedis	0.281178	0.112023	0.0779221	0.0242113	7.08e-06	0.00547481	0.203256	0.138004	0.268507	3.60845
Intestinimonas	0.16321	0.0587574	0.0451802	0.0153224	1.9e-06	0.00146916	0.118029	0.0835476	0.152511	3.61242
Ercella	0.0575331	0.0239473	0.0157307	0.00837426	9.36e-06	0.00723176	0.0418023	0.0274748	0.0561299	3.65736
Acholeplasma	0.222621	0.0818419	0.0537772	0.02355	1.27e-06	0.000980357	0.168843	0.120562	0.217124	4.13968
Jonquetella	0.242083	0.085665	0.0550576	0.0165889	8.02e-07	0.000620186	0.187025	0.137287	0.236764	4.3969
Enterocloster	0.218694	0.0963122	0.0479239	0.0227904	8.96e-06	0.00692774	0.17077	0.114487	0.227053	4.56336
Porphyromonas	0.784635	0.414461	0.149442	0.0695448	4.8e-05	0.0371343	0.635193	0.395326	0.87506	5.25043
Mageeibacillus	0.188476	0.0421595	0.0354856	0.0127989	3.8e-10	2.94e-07	0.152991	0.128037	0.177945	5.31134
Erysipelothrix	0.41895	0.188225	0.07591	0.0237797	7.68e-06	0.00593976	0.34304	0.234561	0.451519	5.51904
Clostridium_sensu_stricto	0.17994	0.0687106	0.0312786	0.0176407	7.5e-07	0.000579586	0.148662	0.108369	0.188955	5.75283
Anaerobutyricum	0.257277	0.133369	0.0422535	0.0161888	2.93e-05	0.0226386	0.215023	0.138191	0.291856	6.08889
Geothermobacter	0.0290226	0.0152984	0.00438998	0.00533913	2.46e-05	0.0190275	0.0246326	0.0154813	0.033784	6.61111
Capnocytophaga	0.577379	0.131334	0.0755442	0.048033	9.25e-11	7.15e-08	0.501835	0.422935	0.580736	7.64294
Desulfosudis	0.262399	0.0744306	0.0340223	0.0247795	3.89e-09	3.01e-06	0.228376	0.184027	0.272726	7.71254
Anaerocella	0.0297055	0.0174136	0.00329248	0.00297203	5.34e-05	0.0412547	0.026413	0.0163316	0.0364944	9.02222
Ruminococcoides	0.0628254	0.0301099	0.00512164	0.00493533	4.1e-06	0.00316859	0.0577038	0.0402856	0.075122	12.2667
Lacrimispora	0.192232	0.0762102	0.0142674	0.00709373	4.45e-07	0.000343904	0.177965	0.134152	0.221778	13.4735
Acutalibacter	0.0662399	0.0239838	0.00438998	0.00380183	1.09e-07	8.45e-05	0.0618499	0.0479839	0.0757159	15.0889
Odoribacter	0.232352	0.0398421	0.0139016	0.00702739	3e-12	2.32e-09	0.21845	0.195368	0.241532	16.714
Paludibacter	0.0809219	0.0358002	0.00475581	0.00360302	1.34e-06	0.00103598	0.0761661	0.0555744	0.0967578	17.0154
Anaeromyxobacter	0.0112676	0.00692211	0.000548747	0.00142862	4.18e-05	0.032331	0.0107189	0.00669263	0.0147451	20.5333
Carboxylicivirga	0.39761	0.171297	0.0160966	0.0104438	8.21e-07	0.000634888	0.381513	0.2832	0.479827	24.7015
Zhouia	0.0259496	0.0156431	0.000731663	0.00203686	2.91e-05	0.0225062	0.025218	0.0161993	0.0342366	35.4667
Prolixibacter	0.269569	0.151056	0.00621913	0.00586472	1.34e-05	0.010357	0.26335	0.176718	0.349982	43.3451
Zongyangia	0.129577	0.0625441	0.00274374	0.0032772	2.47e-06	0.00191132	0.126834	0.0909491	0.162718	47.2267
Harryflintia	0.300299	0.129836	0.00603622	0.00480132	6.82e-07	0.000527007	0.294263	0.219804	0.368721	49.7495
Algoriphagus	0.0397781	0.0169574	0.000365831	0.0008961	4.98e-07	0.000384967	0.0394122	0.0296828	0.0491417
Olivibacter	0.0711908	0.0334309	0.000548747	0.00197854	1.53e-06	0.00118087	0.070642	0.0514562	0.0898279
SR1_genera_incertae_sedis	0.047802	0.0234827	0.000182916	0.000659512	2.51e-06	0.0019388	0.047619	0.0341548	0.0610833
Succinimonas	0.0392659	0.0153839	0	0	1.65e-07	0.000127297	0.0392659	0.0304476	0.0480842
Nitrospina	0.0375587	0.0163483	0	0	5.87e-07	0.000454127	0.0375587	0.0281875	0.0469298
Abditibacterium	0.0274861	0.0159092	0	0	1.49e-05	0.0114923	0.0274861	0.0183667	0.0366056

## Sheet: S7B
Supplementory Table S7B: List of 11 bacterial genera showed statistical significant differences between 0% and 17M moriga fed sheep's LI. Comparsion between two groups was done uisngtwo-sided Welch's t-test with > 0.95% CI and Boneferroni multiple test correction in STAMP software.
SampleID	E_LI-0%M: mean rel. freq. (%)	E_LI-0%M: std. dev. (%)	F_LI-17%M: mean rel. freq. (%)	F_LI-17%M: std. dev. (%)	p-values	p-values (corrected)	Difference between means	95.0% lower CI	95.0% upper CI	Fold change
Caproiciproducens	0.134699	0.0221833	1.91293	0.178114	2.44e-06	0.00188859	-1.77823	-1.98267	-1.57379	14.2015
Muribaculum	0.454289	0.230744	3.39565	0.513236	6.55e-06	0.00506371	-2.94136	-3.54433	-2.33839	7.47463
Acidaminococcus	0.00358515	0.00261153	0.0234742	0.00374518	6.97e-06	0.00539079	-0.019889	-0.0247064	-0.0150717	6.54762
Stieleria	0.0763124	0.0875096	0.619718	0.0945656	1.05e-05	0.00809549	-0.543406	-0.681512	-0.405299	8.12081
Roseimaritima	0.133675	0.118191	1.20529	0.214211	1.15e-05	0.00892117	-1.07162	-1.33079	-0.812441	9.0166
Duncaniella	0.0163892	0.0095268	0.372599	0.0529941	1.44e-05	0.0111327	-0.35621	-0.416988	-0.295432	22.7344
Papillibacter	0.459411	0.0752654	1.0653	0.130216	1.9e-05	0.0146692	-0.60589	-0.764941	-0.446839	2.31884
Pseudoflavonifractor	0.292958	0.0339963	0.104567	0.0407167	3.49e-05	0.0269966	0.188391	0.132025	0.244757	2.80163
Siphonobacter	0.00102433	0.00125454	0.0115237	0.0024518	3.94e-05	0.0304313	-0.0104994	-0.0134276	-0.00757117	11.25
Acutalibacter	0.0681178	0.0104461	0.0157917	0.00879877	4.97e-05	0.0384454	0.0523261	0.0371838	0.0674684	4.31351
Ruminiclostridium	0.48041	0.0560252	0.154503	0.0282723	6.38e-05	0.0493135	0.325907	0.249417	0.402397	3.10939
