# Supplementary material
Source: Research Square preprint supplement (doi:10.21203/rs.3.rs-9593000/v1)
Supplement: Supplementary file 18 [file e38d502cd36a8a99e723eaac.xlsx]

## Sheet: Sheet1
Supplementary Table S5: The table summarizes the result of post-hoc pairwise comparison with Mann-Whitney tests for each pairs-16S amplicon data. The statistic is W-statistic for nonparametric tests. The multi-testing adjustment is based on Benjamini-Hochberg procedure (FDR). This analysis was carried out for 16S amplicon data.
Observed
Pair	Statistic	P-value	FDR
A_FS-0%M vs B_FS-17%M	167	0.000247	0.0018562
C_SI-0%M vs D_SI-17%M	28	0.36597	0.42227
E_LI-0%M vs F_LI-17%M	18	0.66234	0.66234
Chao1
A_FS-0%M vs B_FS-17%M	156	0.0010194	0.011655
C_SI-0%M vs D_SI-17%M	25	0.62821	0.70965
E_LI-0%M vs F_LI-17%M	18	0.66234	0.70965
Shannon
A_FS-0%M vs B_FS-17%M	182	9.9709e-08	1.4956e-06
C_SI-0%M vs D_SI-17%M	28	0.36597	0.39211
E_LI-0%M vs F_LI-17%M	17	0.79221	0.79221
Simpson
A_FS-0%M vs B_FS-17%M	182	9.9709e-08	1.4956e-06
C_SI-0%M vs D_SI-17%M	22	0.94522	0.94522
E_LI-0%M vs F_LI-17%M	9	0.329	0.3525
ACE
A_FS-0%M vs B_FS-17%M	160	0.00041888	0.0036765
C_SI-0%M vs D_SI-17%M	27	0.44522	0.55653
E_LI-0%M vs F_LI-17%M	18	0.66234	0.66234
