# Supplementary material
Source: Research Square preprint supplement (doi:10.21203/rs.3.rs-9593000/v1)
Supplement: Supplementary file 19 [file eefea00f4658a9fa9e220e2a.xlsx]

## Sheet: RUS
Supplementary Table 10A: List of genera with relative abundance 1.5% in RUS samples in either of two group. The highlighted in green colour are abundant in 17%M while red one are in 0%M fed sheep.
Genus	RUS_0%: mean rel. freq. (%)	RUS_0%: std. dev. (%)	RUS_17%: mean rel. freq. (%)	RUS_17%: std. dev. (%)	Fold Change
Segatella	13.2966	0.190078	21.2323	1.80219	1.59683
Succiniclasticum	3.03587	0.194992	3.5619	0.207208	1.17327
Xylanibacter	4.42602	0.10411	5.24158	0.24625	1.18426
Parabacteroides	2.66404	0.0765199	3.34518	0.121336	1.25568
Ruminococcus	2.82991	0.0844127	2.96618	0.379487	1.04815
Treponema	1.82931	0.0985881	1.86591	0.356942	1.02
Lucifera	0.561243	0.00424009	0.717857	0.243459	1.27905
Vescimonas	0.909797	0.00574749	1.9186	0.0950872	2.10882
Coprococcus	0.494182	0.0162216	1.65811	0.275599	3.35527
Succinivibrio	0.275957	0.0141285	2.30909	0.51175	8.36757
Selenomonas	0.180728	0.00164683	2.33571	0.285049	12.9239
Anseongella	7.47247	0.328043	4.74233	0.145672	1.5757
Paraprevotella	5.7557	0.237952	3.06947	0.265517	1.87515
Subdivision5_GIS	3.33717	0.0740121	2.79725	0.35704	1.19302
Prevotella	3.88397	0.139788	2.48873	0.208946	1.56062
Coprobacter	3.92742	0.230966	1.39774	0.116719	2.80983
Saccharofermentans	2.58916	0.103232	2.41992	0.262175	1.06993
Fibrobacter	4.40664	0.0333269	2.48601	0.340215	1.77258
Butyrivibrio	2.1346	0.0464772	1.7192	0.1885	1.24162
Barnesiella	1.18451	0.0235701	0.610384	0.00157494	1.9406

## Sheet: RUL
Supplementary Table 10B: List of genera with relative abundance 1.5% in RUL samples in either of two group. The highlighted in green colour are abundant in 17%M while red one are in 0%M fed sheep.
Genus	RUL_0%: mean rel. freq. (%)	RUL_0%: std. dev. (%)	RUL_17%: mean rel. freq. (%)	RUL_17%: std. dev. (%)	Fold change
Segatella	11.8222	0.635873	18.084	0.693904	1.52967
Subdivision5_genera_incertae_sedis	3.44944	0.340252	7.37538	0.53842	2.13814
Parabacteroides	3.82658	0.292209	5.59628	0.110352	1.46247
Xylanibacter	4.73425	0.311273	6.84007	0.145495	1.44481
Vescimonas	1.28556	0.0248097	5.29476	0.145087	4.11863
Anaeroplasma	0.651287	0.0142491	1.548	0.143867	2.37683
Selenomonas	0.57299	0.0473399	5.24197	0.637836	9.14844
Succinivibrio	0.261389	0.00356991	5.3057	0.750456	20.2981
Anseongella	6.24693	0.415967	2.96296	0.0774642	2.10834
Prevotella	3.93928	0.217179	3.36827	0.105997	1.16953
Paraprevotella	4.50423	0.0501572	2.68812	0.0803634	1.67561
Succiniclasticum	3.33344	0.0130798	2.66097	0.0949218	1.25271
Saccharofermentans	3.16403	0.0874935	0.903901	0.172601	3.50042
Butyrivibrio	2.40829	0.0341027	1.02591	0.083972	2.34747
Fibrobacter	2.42383	0.0467309	1.61169	0.290633	1.50391
Coprobacter	2.46906	0.013519	0.738957	0.0099785	3.34127
Ruminococcus	1.78749	0.117369	1.64985	0.0643526	1.08342

## Sheet: RE
Supplementary Table 10C: List of genera with relative abundance 1.5% in RET samples in either of two group. The highlighted in green colour are abundant in 17%M while red one are in 0%M fed sheep.
Genus	RET_0%: mean rel. freq. (%)	RET_0%: std. dev. (%)	RET_17%: mean rel. freq. (%)	RET_17%: std. dev. (%)	Fold change
Segatella	10.1154	0.93483	19.7952	0.306841	1.95693
Parabacteroides	3.95252	0.458454	5.39662	0.211632	1.36536
Xylanibacter	3.80045	0.469358	6.93948	0.464892	1.82596
Anseongella	3.74961	0.1872	3.95243	0.140427	1.05409
Subdivision5_genera_incertae_sedis	3.59877	0.175712	5.46694	0.282994	1.51911
Paraprevotella	3.14744	0.277231	3.24694	0.101769	1.03161
Ruminococcus	1.58807	0.119181	1.62661	0.0944336	1.02427
Vescimonas	0.976039	0.0312682	4.4173	0.454881	4.52574
Alistipes	0.727742	0.0736045	1.69574	0.0919992	2.33014
Selenomonas	0.416939	0.0214476	4.34452	0.0737074	10.42
Succinivibrio	0.333362	0.0120947	4.73906	0.767551	14.2159
Bifidobacterium	7.00217	1.1928	0.0675924	0.0214238	103.594
Prevotella	4.2791	0.475112	3.10528	0.200463	1.37801
Succiniclasticum	3.92745	0.118268	2.85598	0.0682287	1.37517
Saccharofermentans	3.7576	0.111367	1.10665	0.188699	3.39549
Butyrivibrio	2.11935	0.172849	1.3721	0.0163879	1.5446
Fibrobacter	2.12693	0.157707	1.3779	0.040024	1.5436
Coprobacter	1.99851	0.0930107	0.959652	0.113509	2.08254
Treponema	1.47672	0.0400975	0.931166	0.0174362	1.58588

## Sheet: OM
Supplementary Table 10D: List of genera with relative abundance 1.5% in OM samples in either of two group. The highlighted in green colour are abundant in 17%M while red one are in 0%M fed sheep.
Genus	OM_0%: mean rel. freq. (%)	OM_0%: std. dev. (%)	OM_17%: mean rel. freq. (%)	OM_17%: std. dev. (%)	Fold change
Segatella	11.0691	3.10772	22.9164	0.871864	2.07029
Succiniclasticum	2.73438	0.0466743	2.82819	0.0572145	1.03431
Ruminococcus	2.33467	0.634832	4.30225	0.128984	1.84276
Phocaeicola	0.683711	0.0506019	1.65036	0.126439	2.41382
Duncaniella	0.521439	0.168528	2.47714	0.0740574	4.75058
Coprococcus	0.490827	0.0354715	1.59431	0.0654235	3.24821
Sodaliphilus	0.32685	0.0471842	2.11174	0.160789	6.46087
Anseongella	6.14105	2.12971	5.84228	0.269123	1.05114
Paraprevotella	4.73647	0.974267	4.00816	0.0524216	1.18171
Xylanibacter	4.33856	0.083198	3.72499	0.0833304	1.16472
Coprobacter	4.26952	0.440768	2.59063	0.122508	1.64806
Prevotella	3.78402	0.258318	2.64908	0.0681889	1.42843
Fibrobacter	3.48011	1.30122	3.30925	0.127828	1.05163
Saccharofermentans	2.71772	0.44335	1.87198	0.0663187	1.45179
Parabacteroides	2.69245	0.204746	2.62257	0.184543	1.02665
Subdivision5_genera_incertae_sedis	2.49363	0.817485	1.93009	0.107993	1.29198
Butyrivibrio	2.26688	0.138139	1.13614	0.0203702	1.99525
Bifidobacterium	2.22286	3.09577	0.0947042	0.0239396	23.4716
Ruminobacter	1.64903	0.44824	0.433915	0.0288503	3.80036

## Sheet: ABO
Supplementary Table 10E: List of genera with relative abundance 1.5% in ABO samples in either of two group. The highlighted in green colour are abundant in 17%M while red one are in 0%M fed sheep.
Genus	ABO_0%: mean rel. freq. (%)	ABO_0%: std. dev. (%)	ABO_17%: mean rel. freq. (%)	ABO_17%: std. dev. (%)	Fold change
Segatella	10.4087	0.92439	21.8673	0.571962	2.10087
Xylanibacter	3.93327	0.219894	5.54998	0.486546	1.41103
Succiniclasticum	3.16626	0.321551	3.7293	0.172859	1.17783
Subdivision5_genera_incertae_sedis	2.51182	0.429907	2.92834	0.628507	1.16582
Ruminococcus	2.33968	0.581225	2.54802	0.178755	1.08905
Duncaniella	0.480813	0.0915495	1.97631	0.241641	4.11035
Selenomonas	0.364725	0.0619299	2.20873	0.223344	6.05587
Sodaliphilus	0.361783	0.126599	1.74865	0.239295	4.83343
Succinivibrio	0.253152	0.0617725	2.46102	0.546962	9.72149
Bifidobacterium	5.63897	2.94963	4.2634	1.25262	1.32265
Anseongella	4.59892	1.02114	3.41847	0.295314	1.34532
Prevotella	4.41381	0.319631	2.49503	0.128301	1.76904
Parabacteroides	3.80353	0.30289	3.42327	0.479045	1.11108
Saccharofermentans	3.55854	0.49111	1.96138	0.164837	1.8143
Paraprevotella	3.0889	0.402861	2.35828	0.270705	1.30981
Coprobacter	2.44238	0.641685	1.29297	0.0368656	1.88897
Butyrivibrio	2.45248	0.189257	1.30248	0.0932077	1.88292
Fibrobacter	2.46592	0.69129	2.21212	0.159209	1.11473
Ruminobacter	1.58528	0.174498	0.417013	0.0184244	3.80151
Lucifera	1.5017	0.205936	1.00287	0.165712	1.49741

## Sheet: Increased-Decreased
Supplementary Table 10F: List of genera with fold change ≥1.5 in each individual organs within FS.
Increased						Decreased
RUS	RUL	RE	OM	ABO		RUS	RUL	RE	OM	ABO
Segatella	Segatella	Segatella	Segatella	Segatella		Anseongella	Anseongella	Bifidobacterium	Butyrivibrio	Prevotella
Vescimonas	Subdivision5_GIS	Xylanibacter	Ruminococcus	Duncaniella		Paraprevotella	Paraprevotella	Saccharofermentans	Bifidobacterium	Saccharofermentans
Coprococcus	Vescimonas	Subdivision5_GIS	Phocaeicola	Selenomonas		Prevotella	Saccharofermentans	Butyrivibrio	Ruminobacter	Coprobacter
Succinivibrio	Anaeroplasma	Vescimonas	Duncaniella	Sodaliphilus		Coprobacter	Butyrivibrio	Fibrobacter		Butyrivibrio
Selenomonas	Selenomonas	Alistipes	Coprococcus	Succinivibrio		Barnesiella	Coprobacter	Coprobacter		Ruminobacter
	Succinivibrio	Selenomonas	Sodaliphilus							Lucifera
		Succinivibrio
