# Supplementary material
Source: Research Square preprint supplement (doi:10.21203/rs.3.rs-9593000/v1)
Supplement: Supplementary file 20 [file fb21e6cde9cb84ddf45402e0.xlsx]

## Sheet: Supplementrary Table S19
Supplementary Table S19: Statistically significant anaerobic fungal genera between two dietary groups. Analysis was performed in STAMP with two-sided Welch's t-test and Bonferroni correction FDR corrections.
Genus	FS-0%M: mean rel. freq. (%)	FS-0%M: std. dev. (%)	FS-17%M: mean rel. freq. (%)	FS-17%M: std. dev. (%)	p-values	p-values (corrected)	Difference between means
Neocallimastix	64.38	12.18	90.69	4.08	0	0	-26.31
Piromyces	33.38	8.88	4.97	4.93	0	0	28.4
Caecomyces	0.17	0.05	0.03	0.05	0	0	0.14
Anaeromyces	0	0	0.01	0.01	0	0.01	-0.01
Capellomyces	0	0	3.45	2.73	0	0.02	-3.44
