# Supplementary material
Source: Research Square preprint supplement (doi:10.21203/rs.3.rs-9593000/v1)

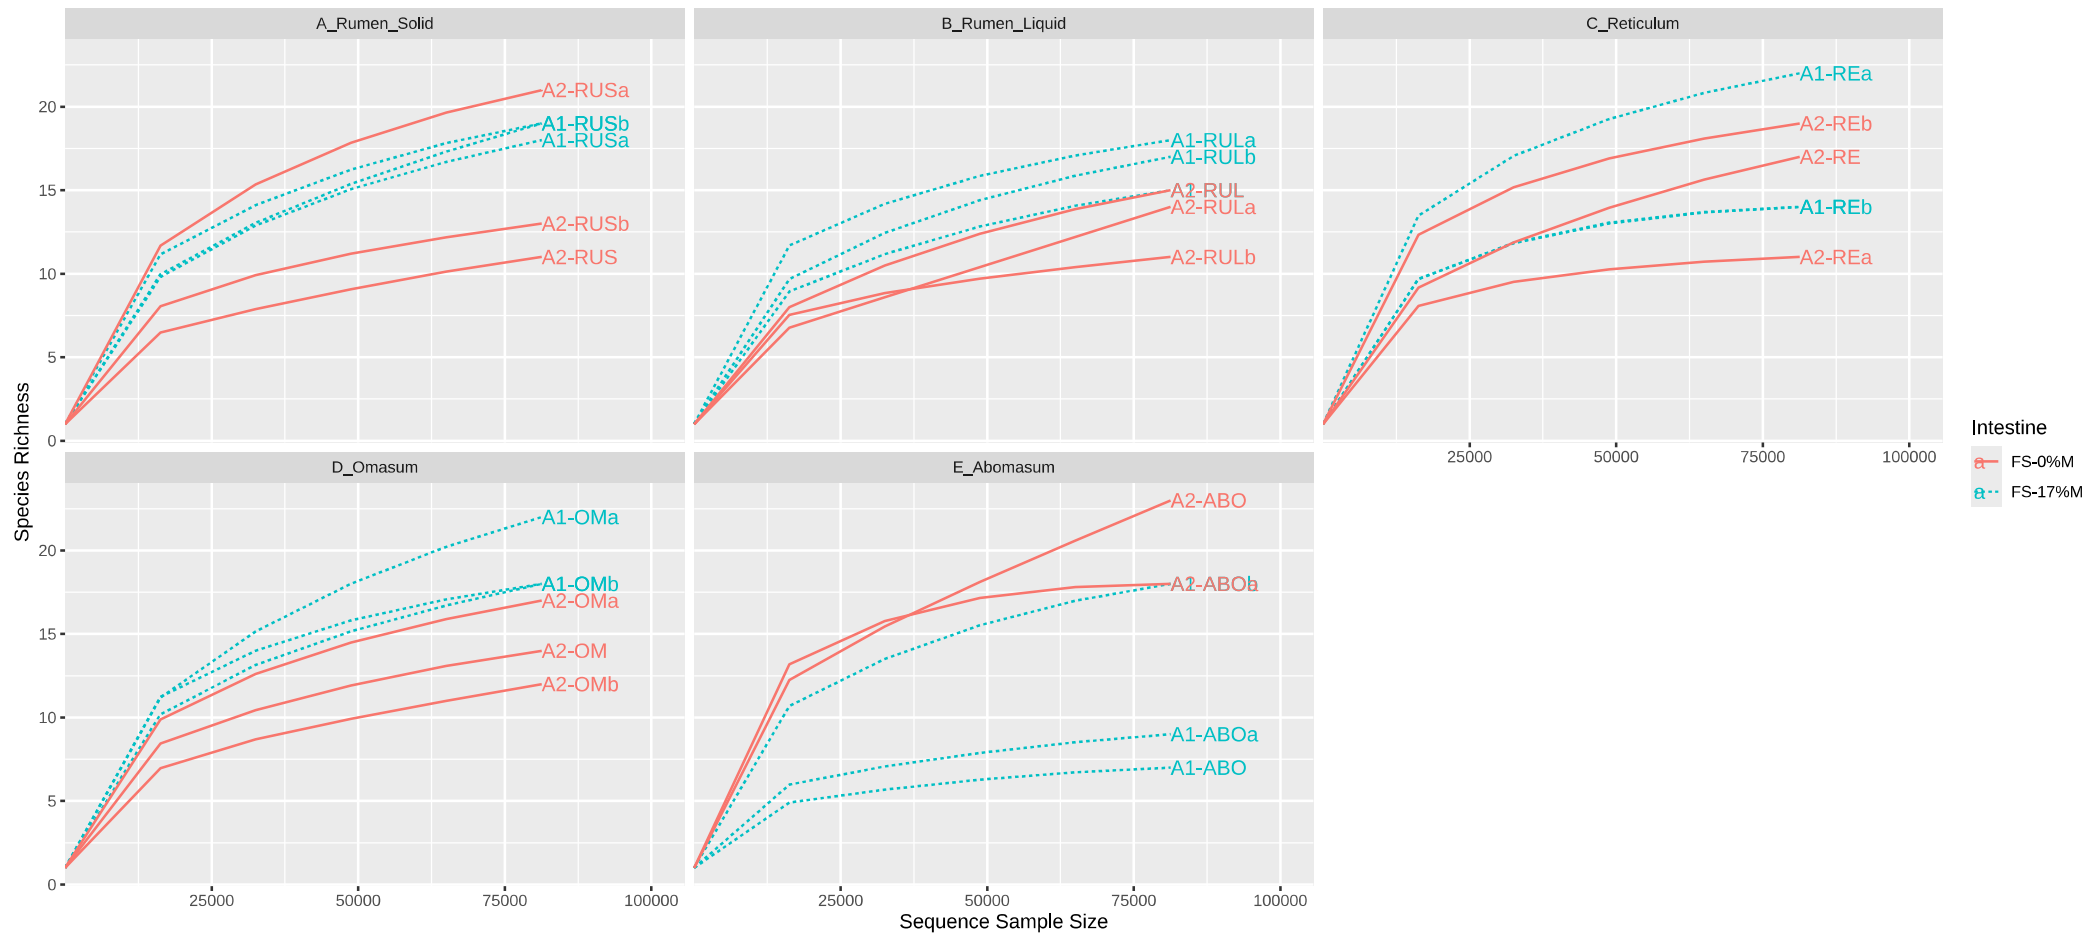

Supplement: Supplementary file 3 [file 258e992f4e5a8e65df1b8be6.pdf]

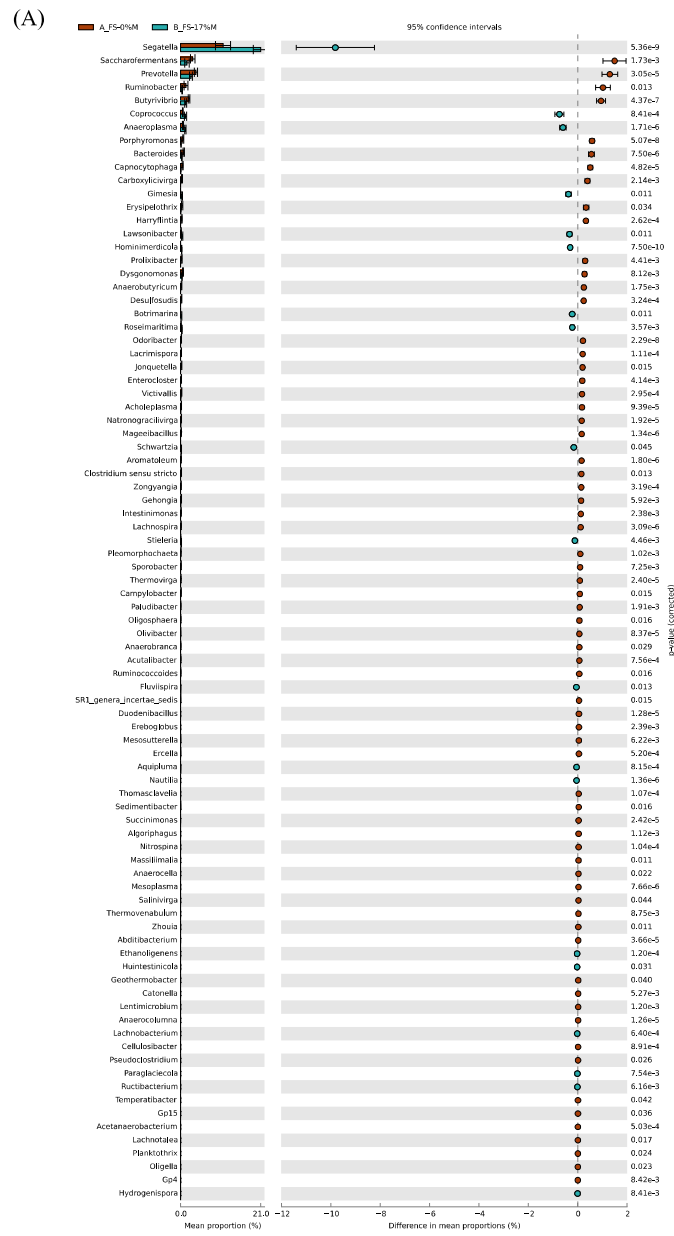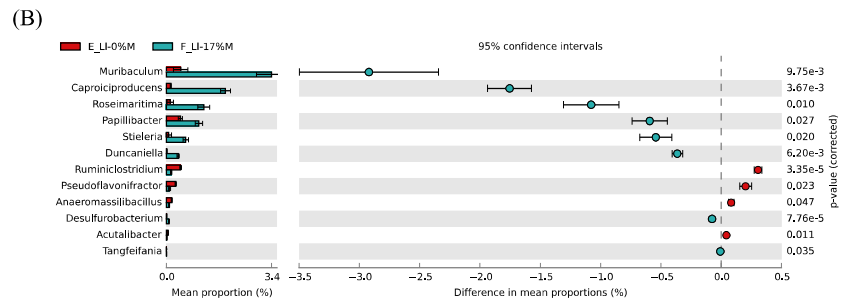

Supplement: Supplementary file 4 [file 2674ce011e06f5fd2c8ed10c.pdf]

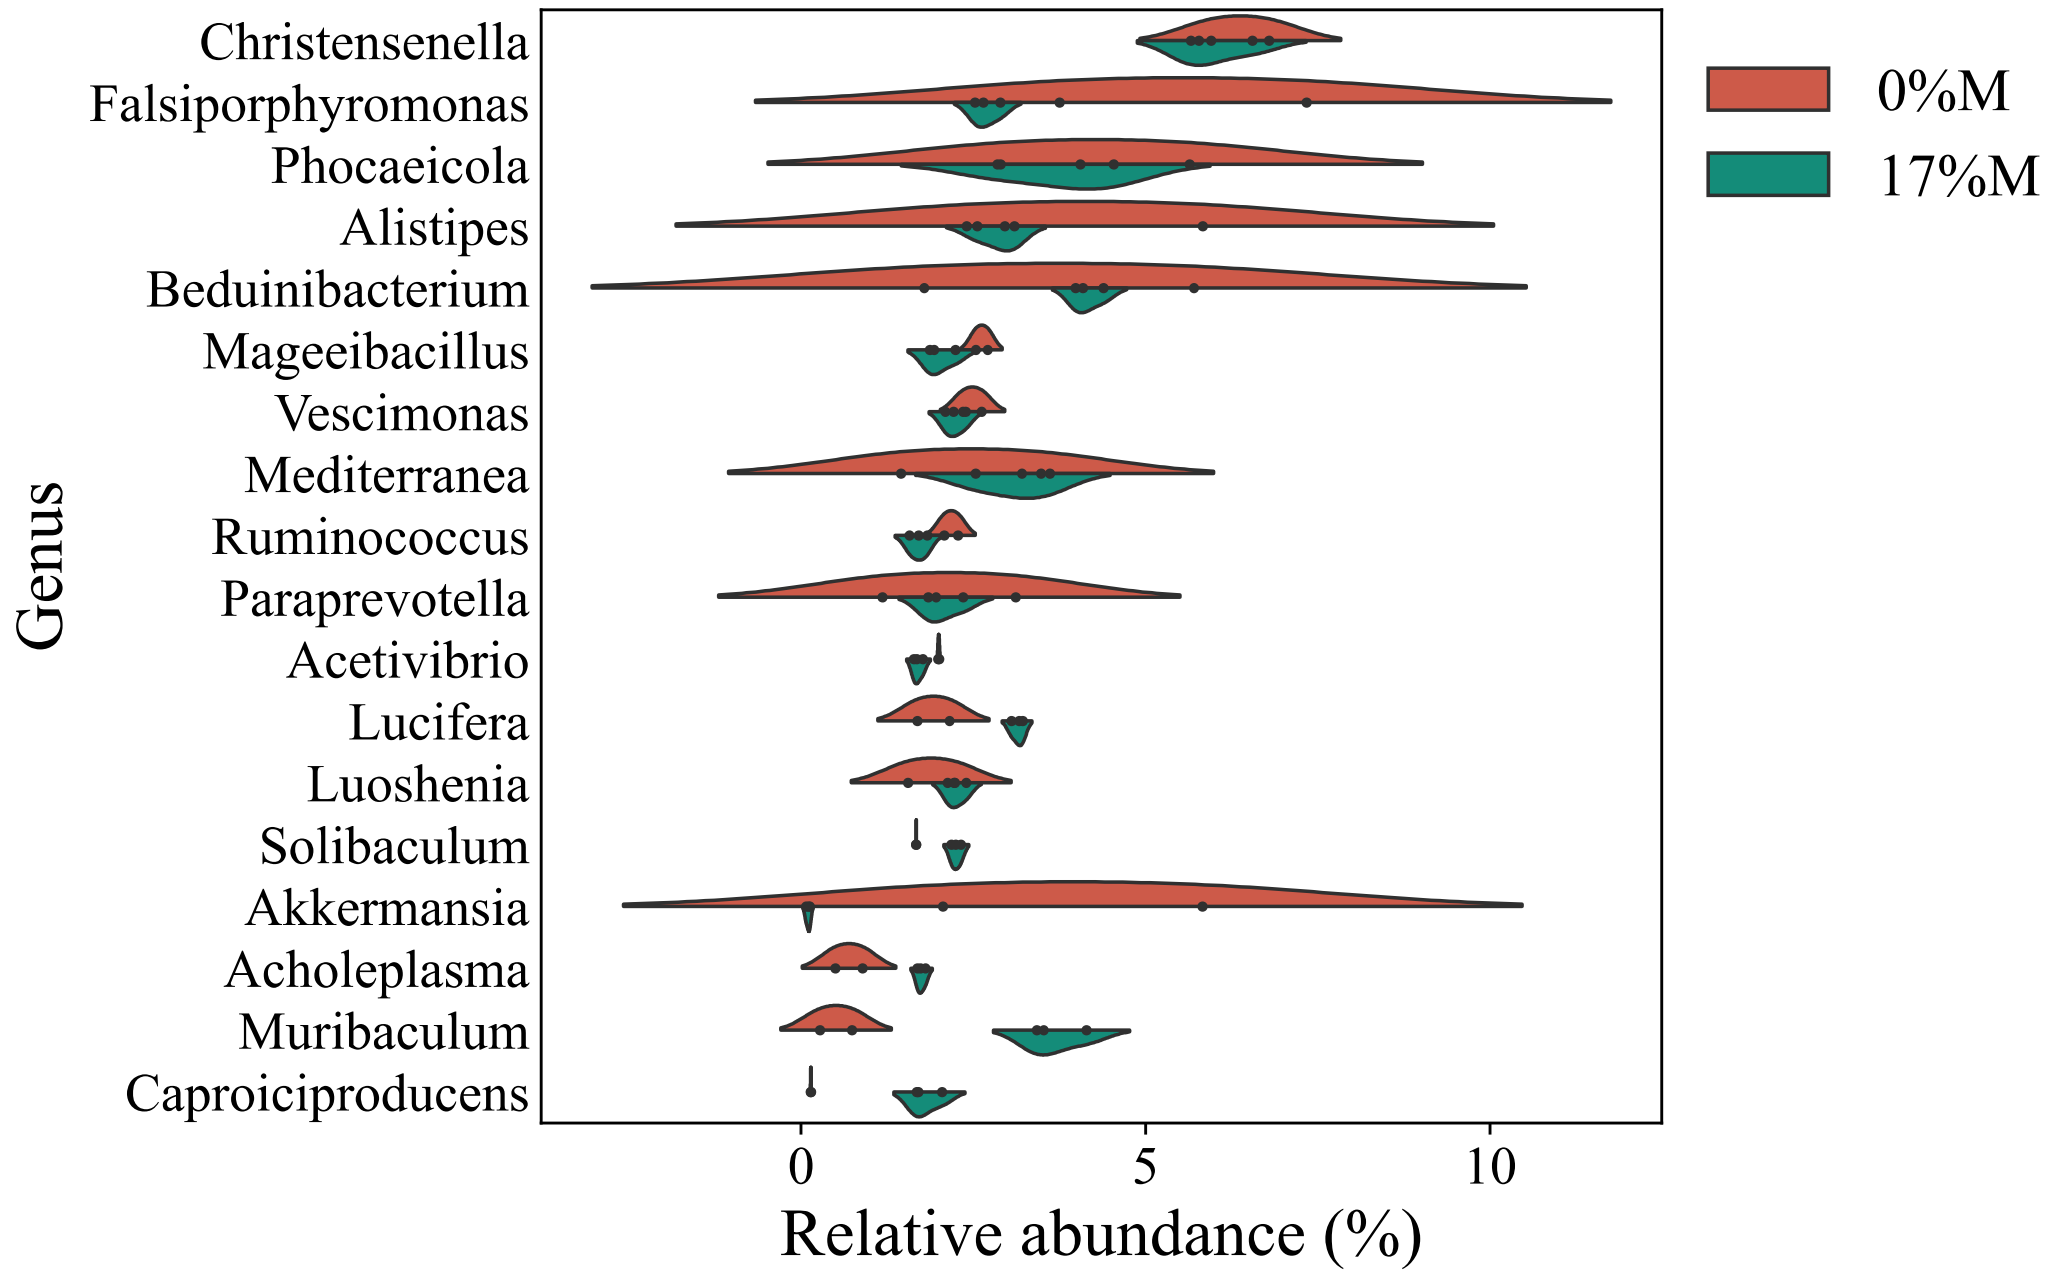

Supplement: Supplementary file 5 [file 33af6d3c057449b709d3c6d5.pdf]

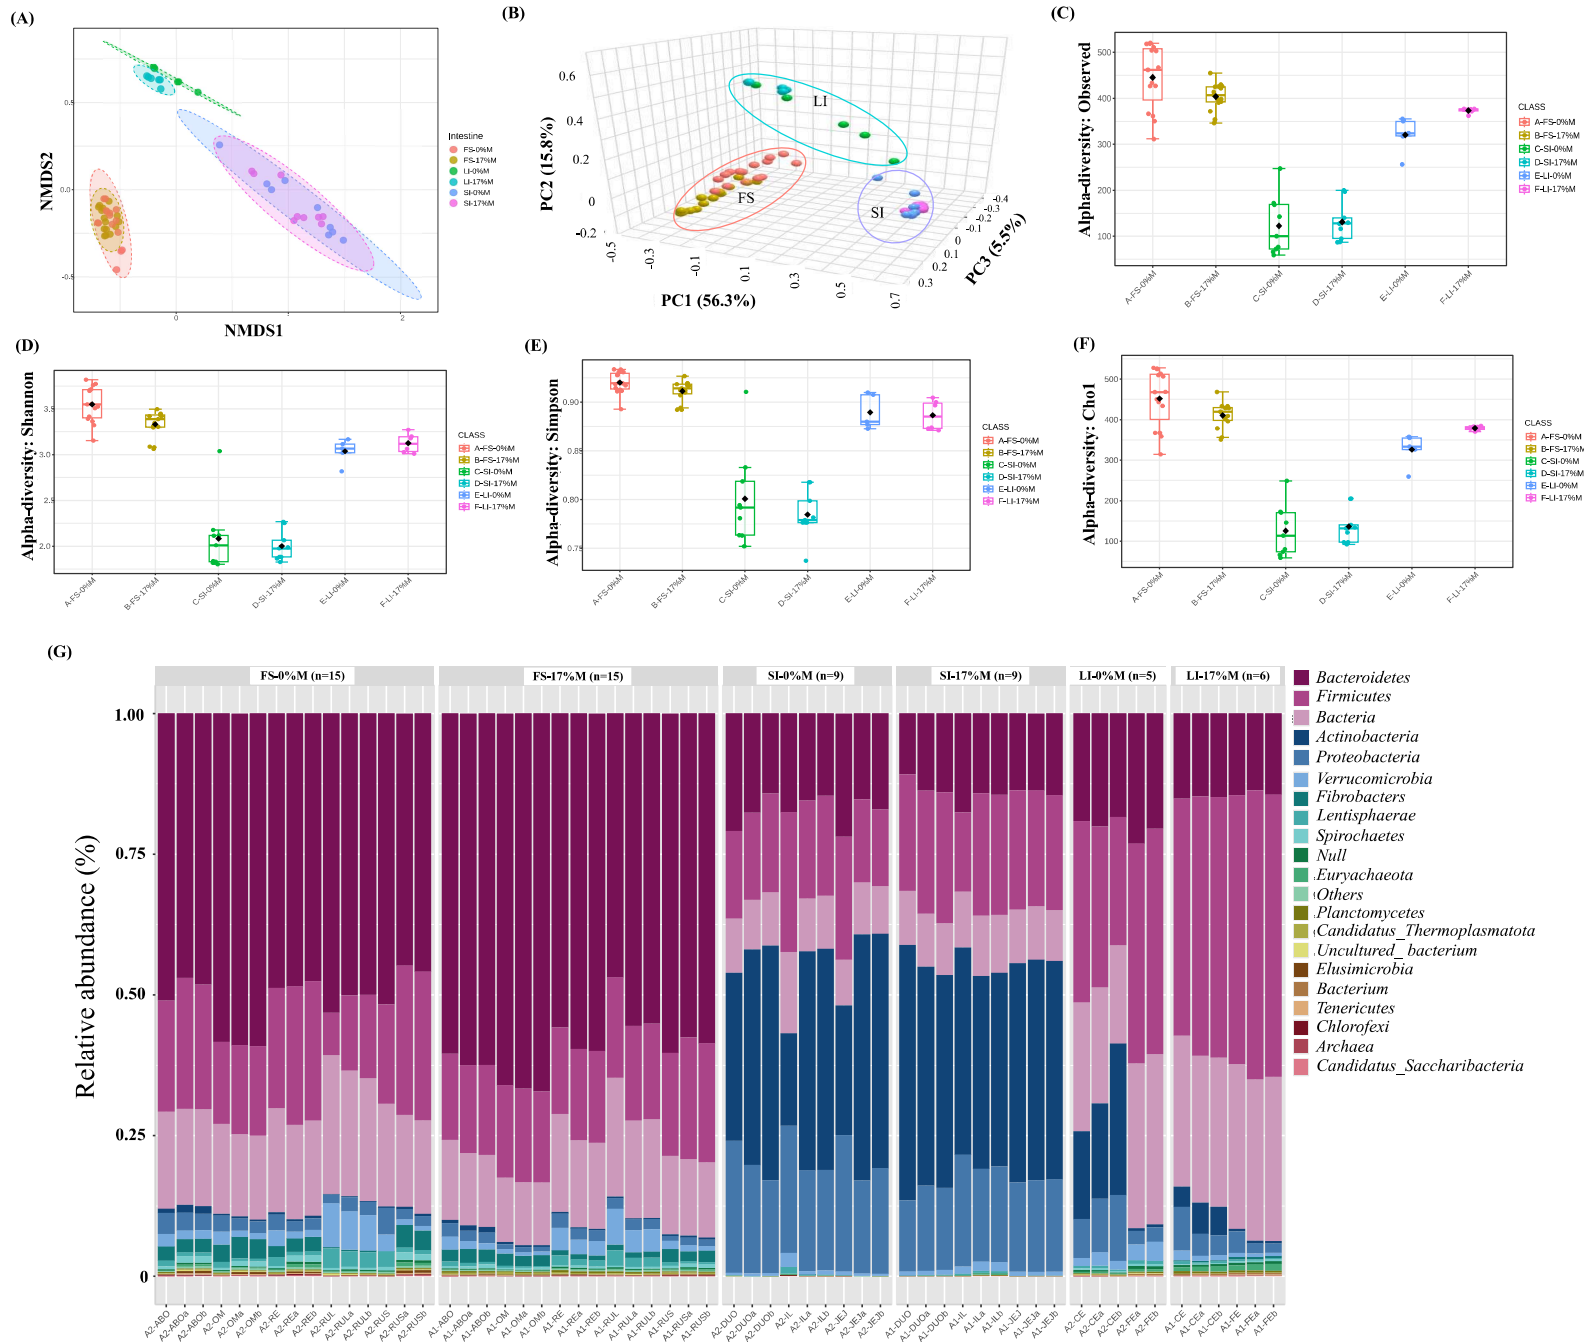

Supplement: Supplementary file 6 [file 44d0061d6def3a284c2c5bbe.pdf]

(A)

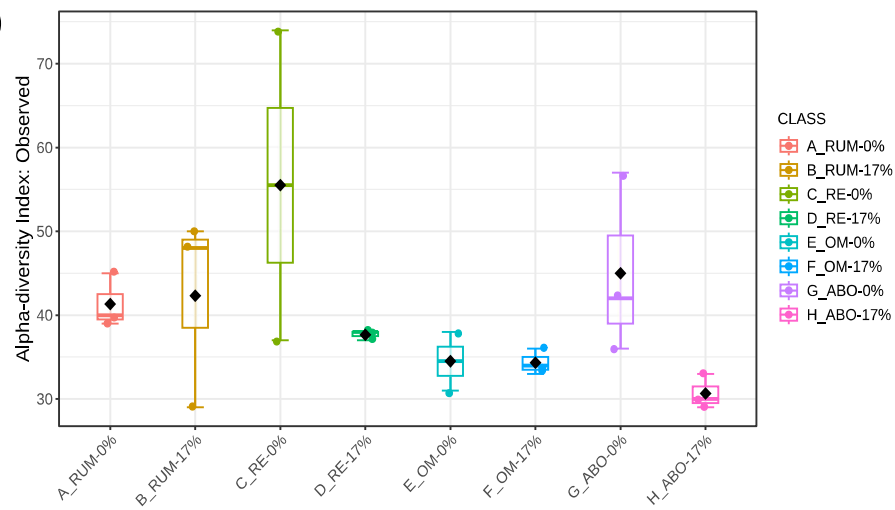

(B)

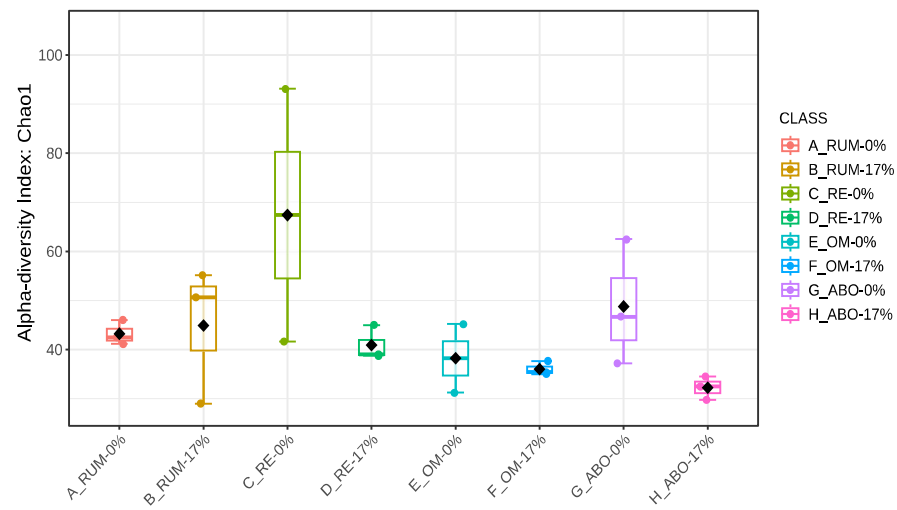

(C)

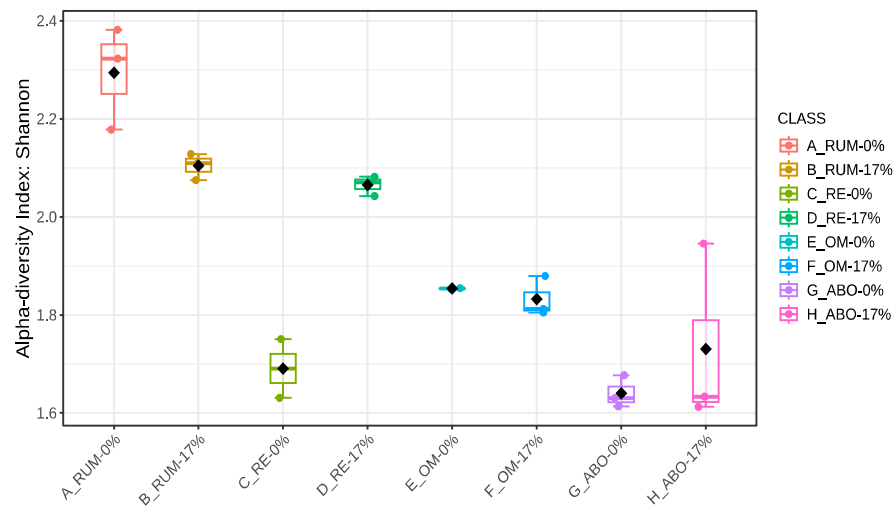

(D)

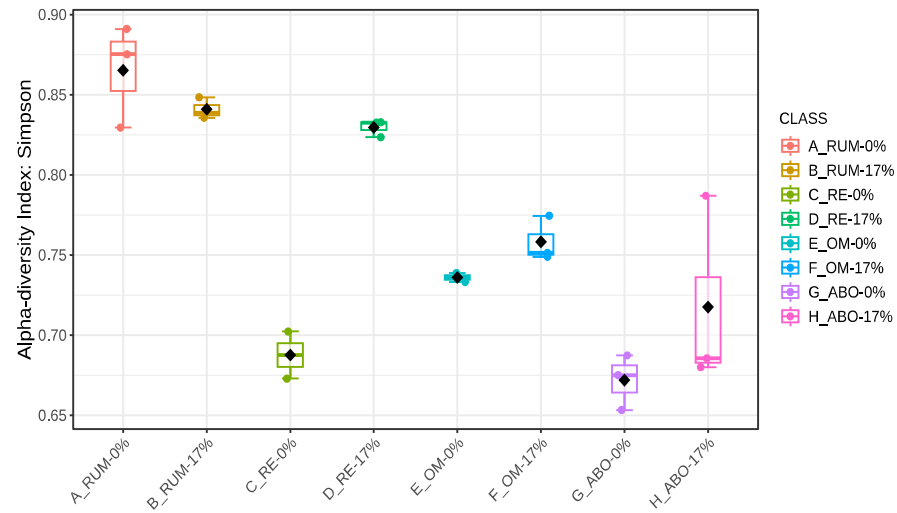

Supplement: Supplementary file 7 [file 45b36907e9b3cefae416fb0c.pdf]

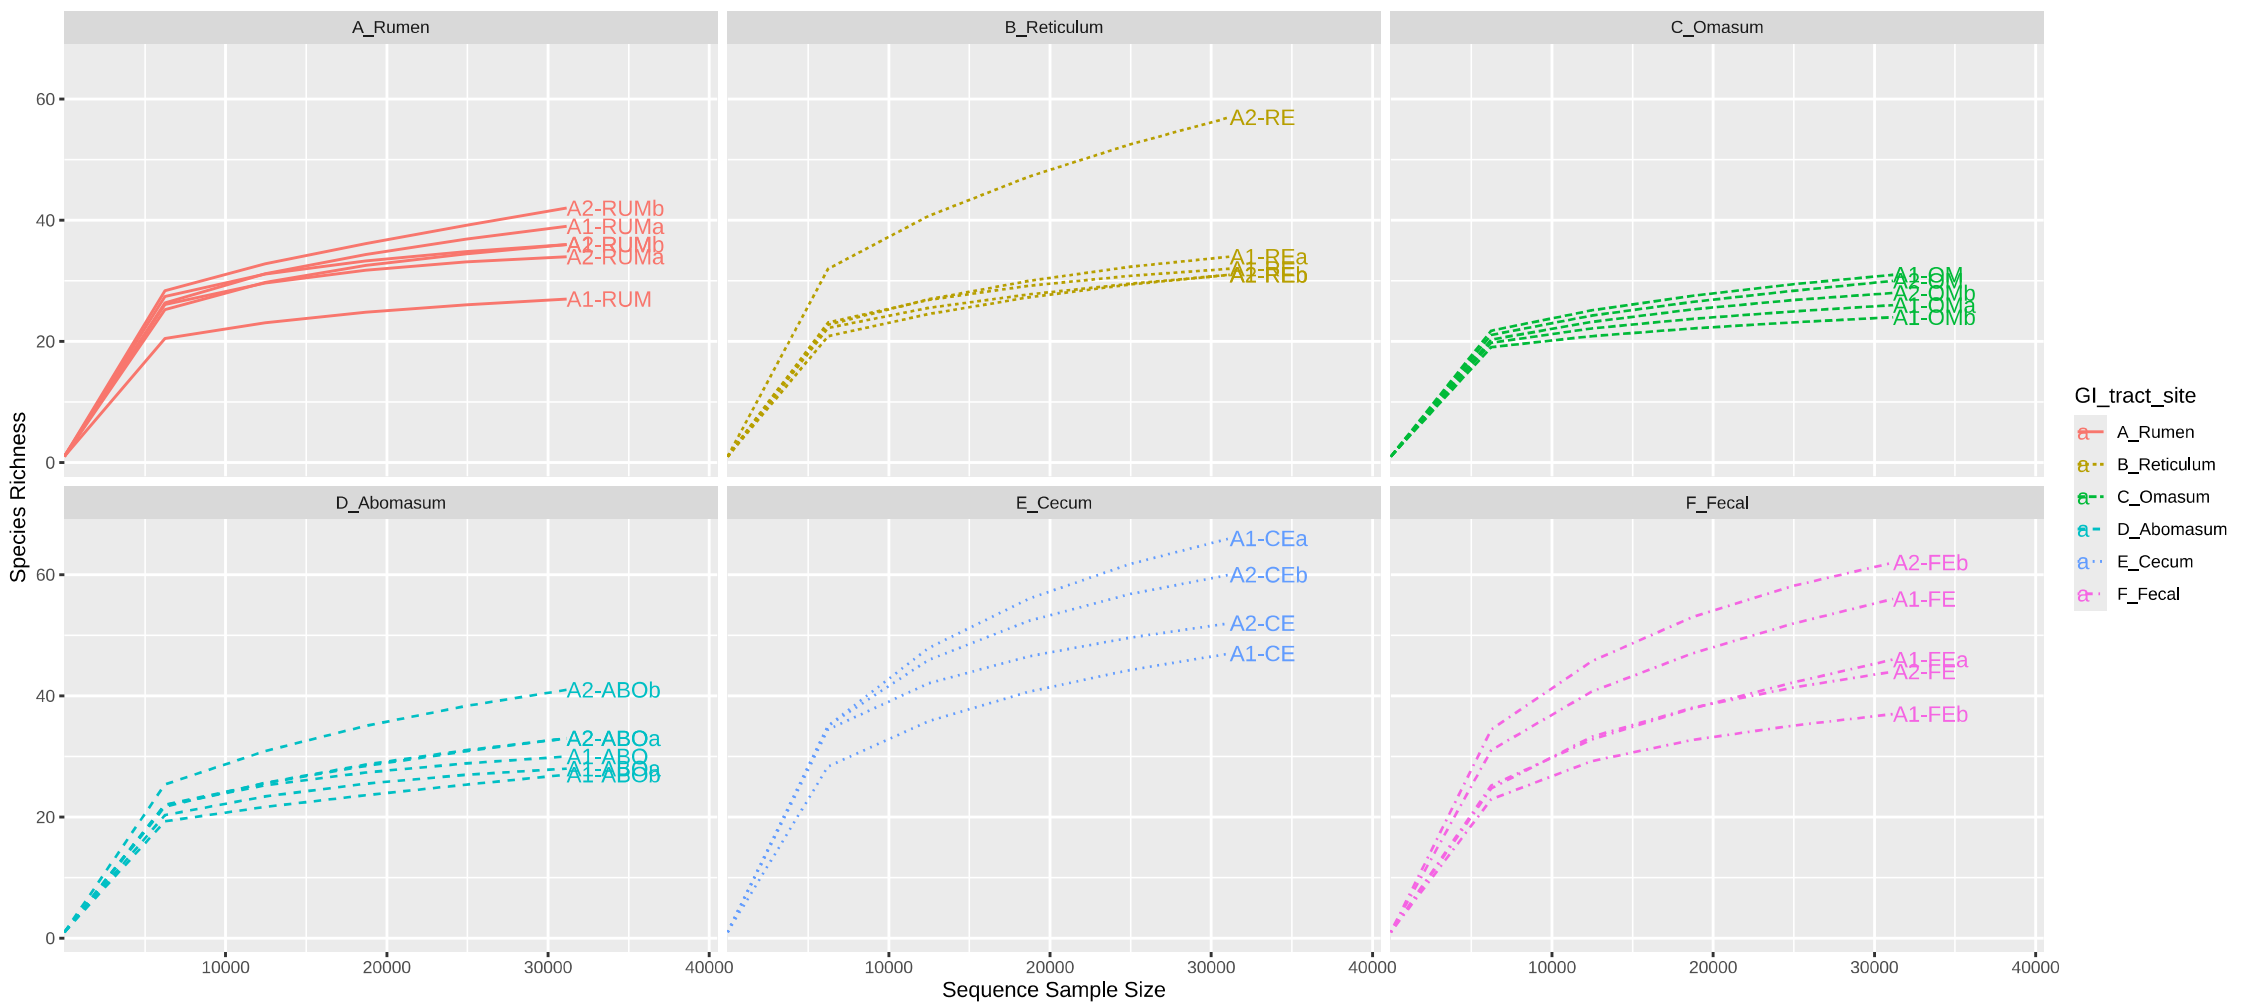

Supplement: Supplementary file 8 [file 4ca5ca34707167ceabde606a.pdf]

(A)

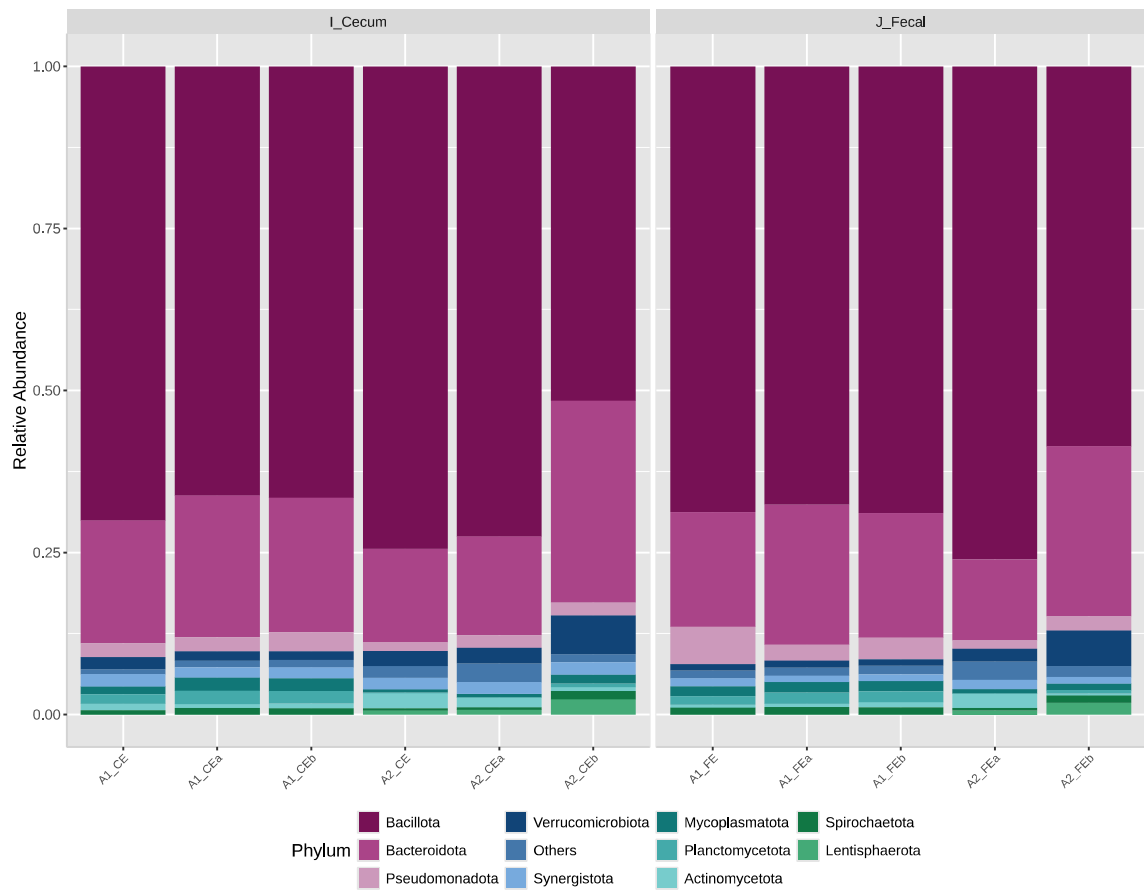

(B)

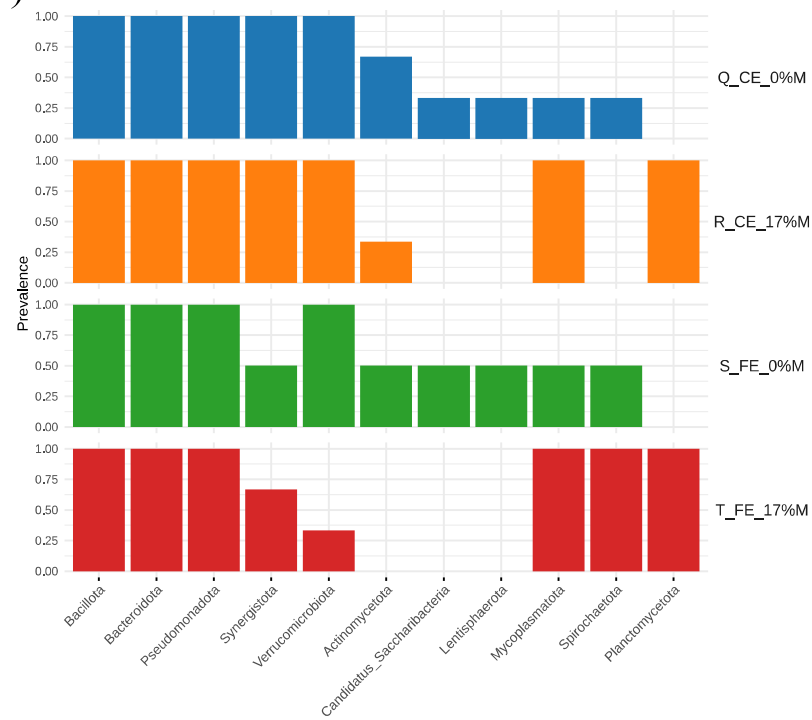

Supplement: Supplementary file 9 [file 62b2771dcb36ed7f773749ee.pdf]

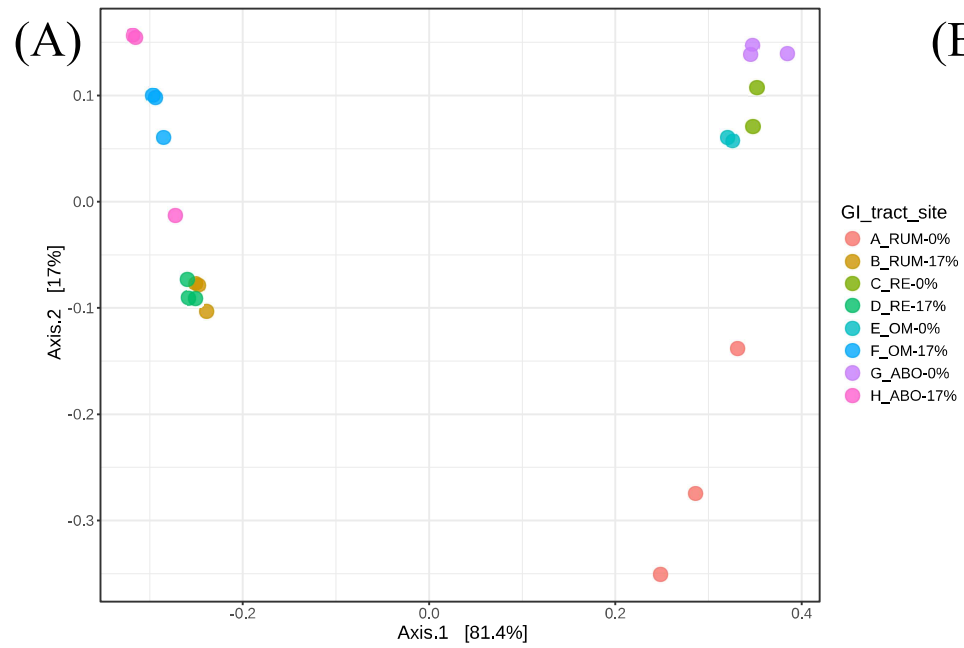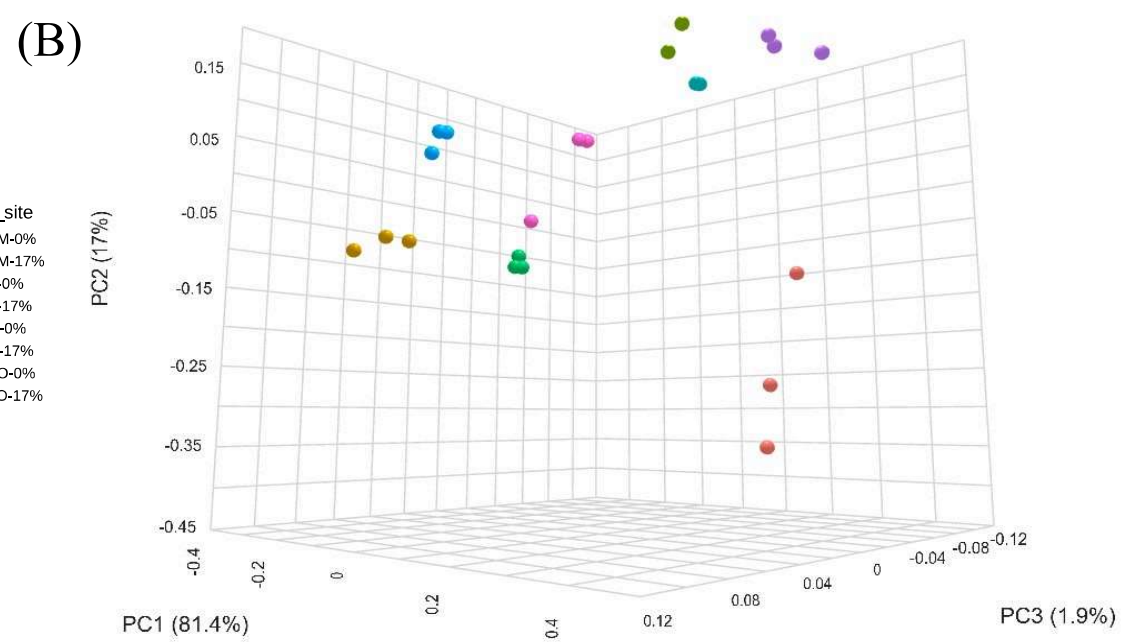

Supplement: Supplementary file 10 [file 73c737bb289d7b71551aa220.pdf]

**(A)**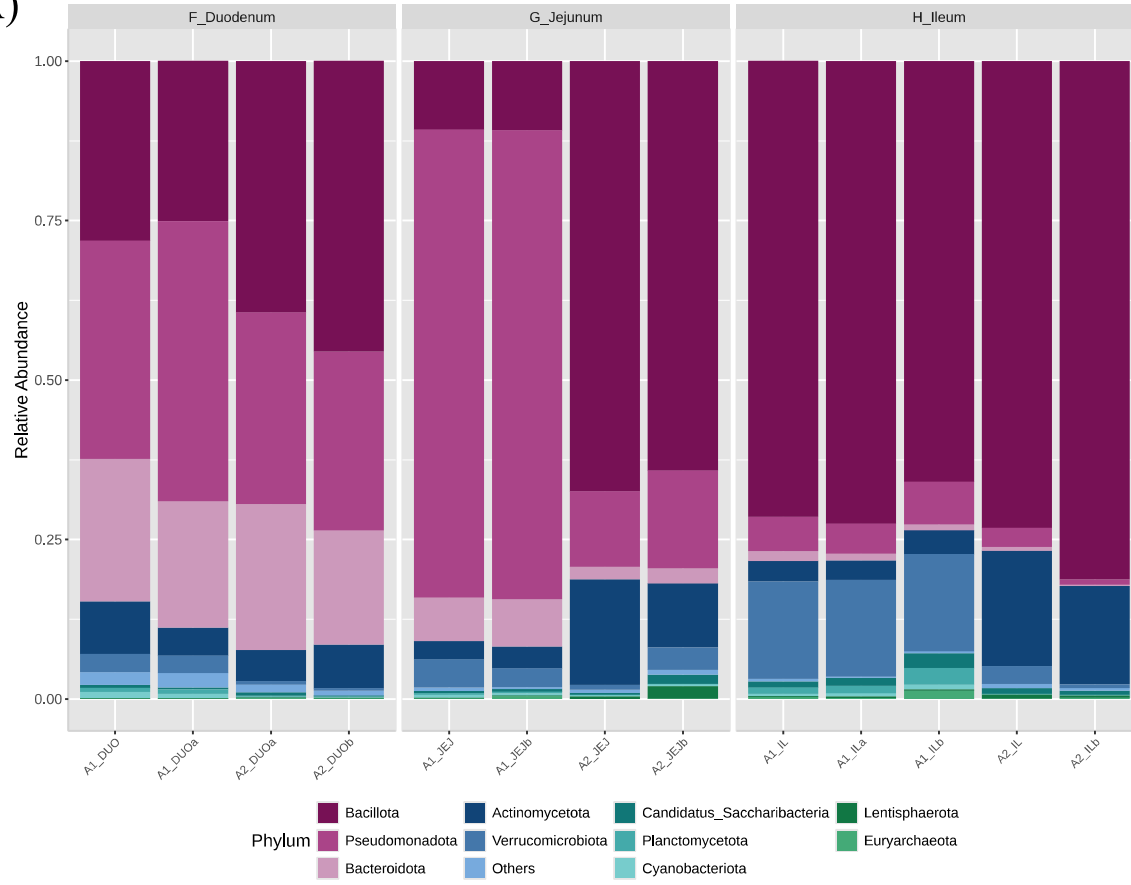**(B)**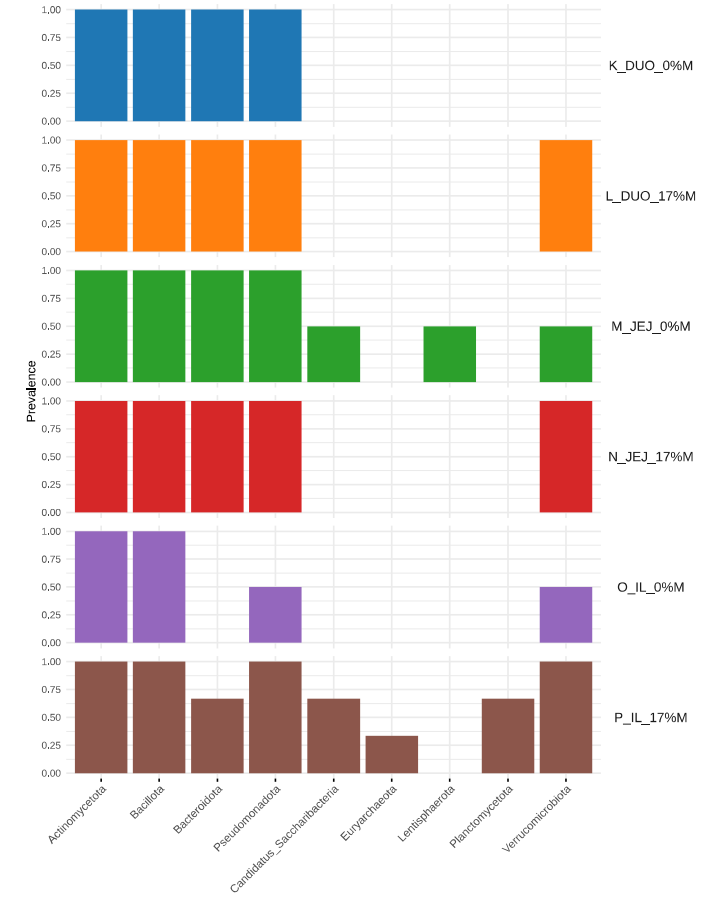

Supplement: Supplementary file 12 [file 88cf73fd3cd26fc16e2f3214.pdf]

(A)

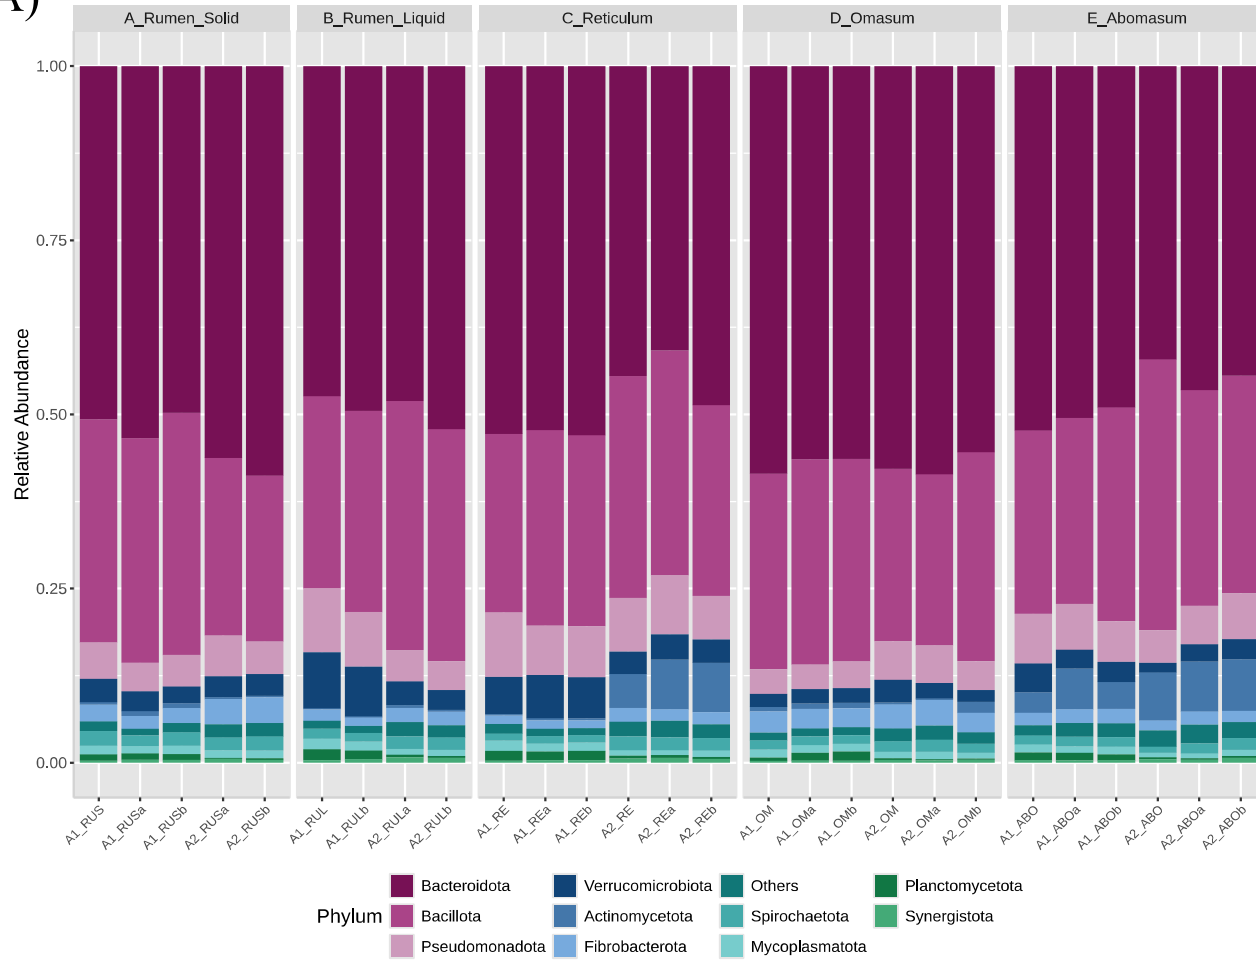

(B)

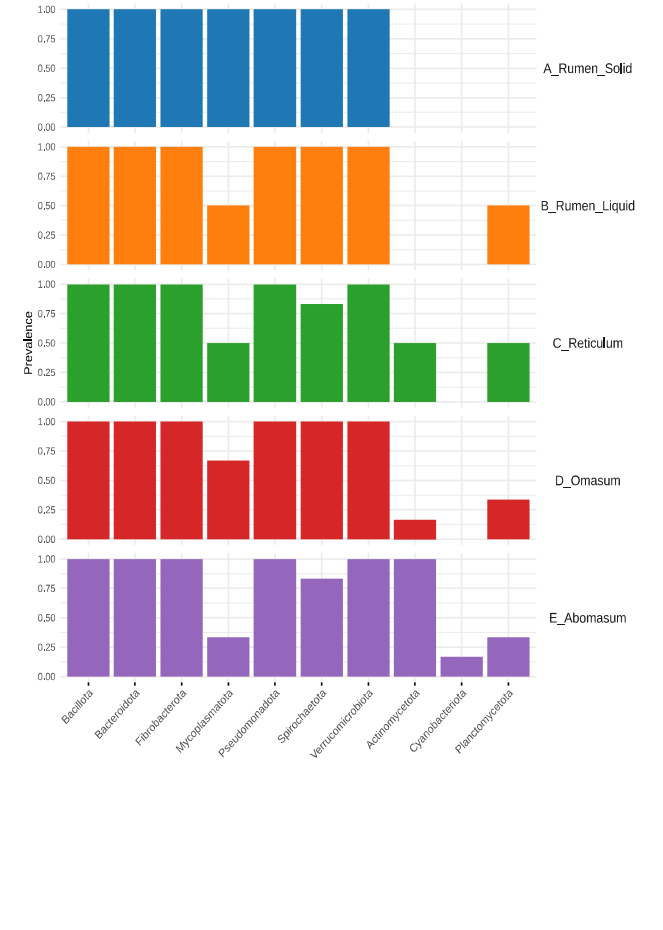

Supplement: Supplementary file 13 [file 9244ff46b0d9461b42b328c3.pdf]

**(A)**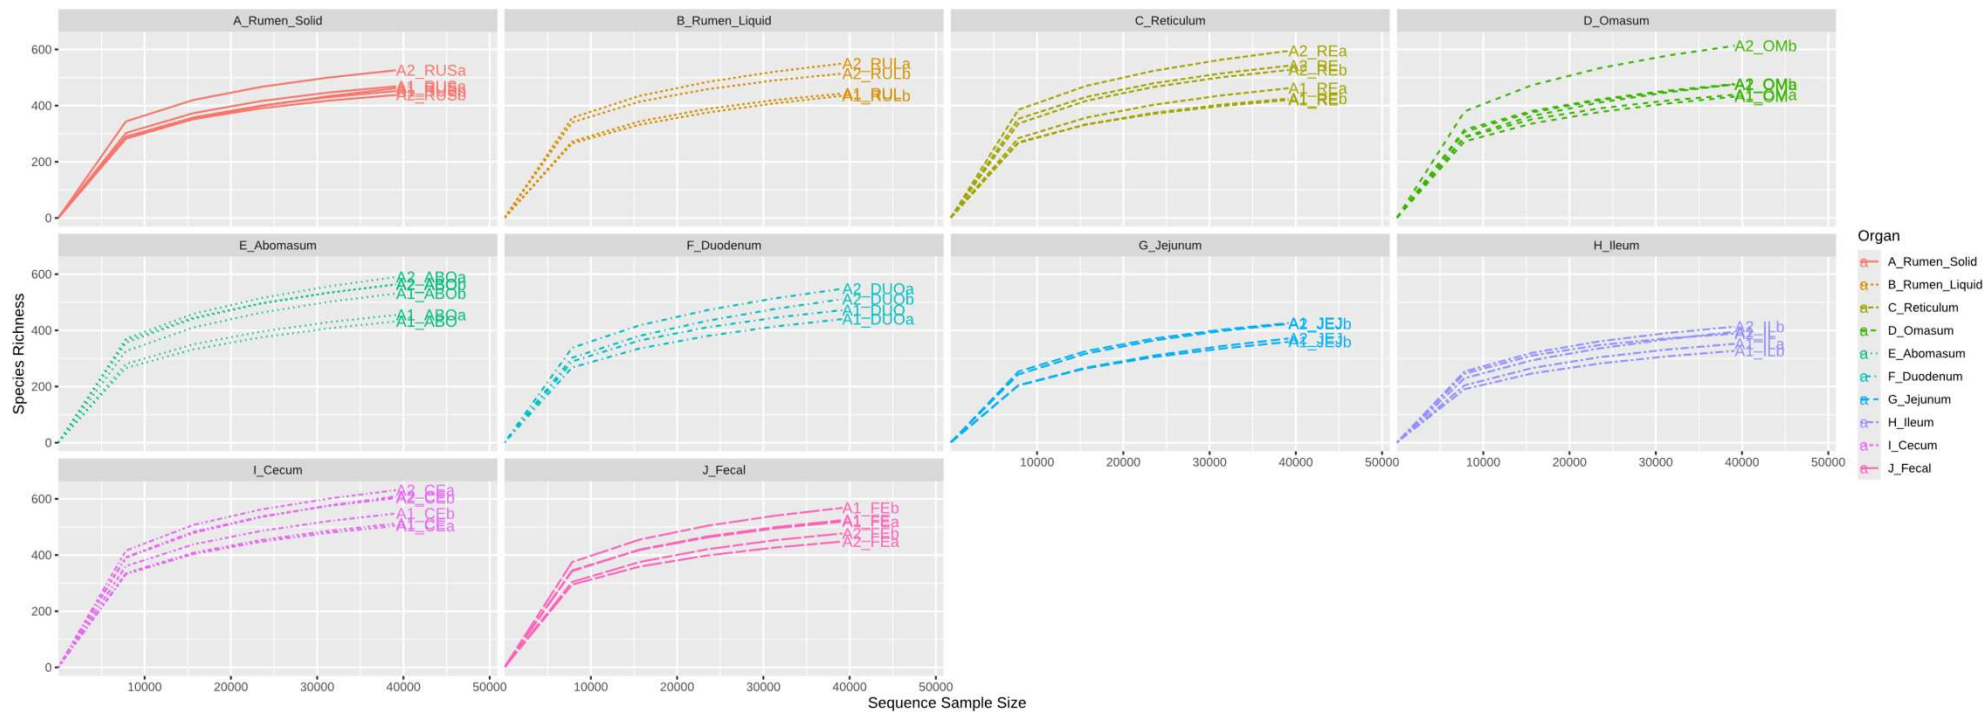**(B)**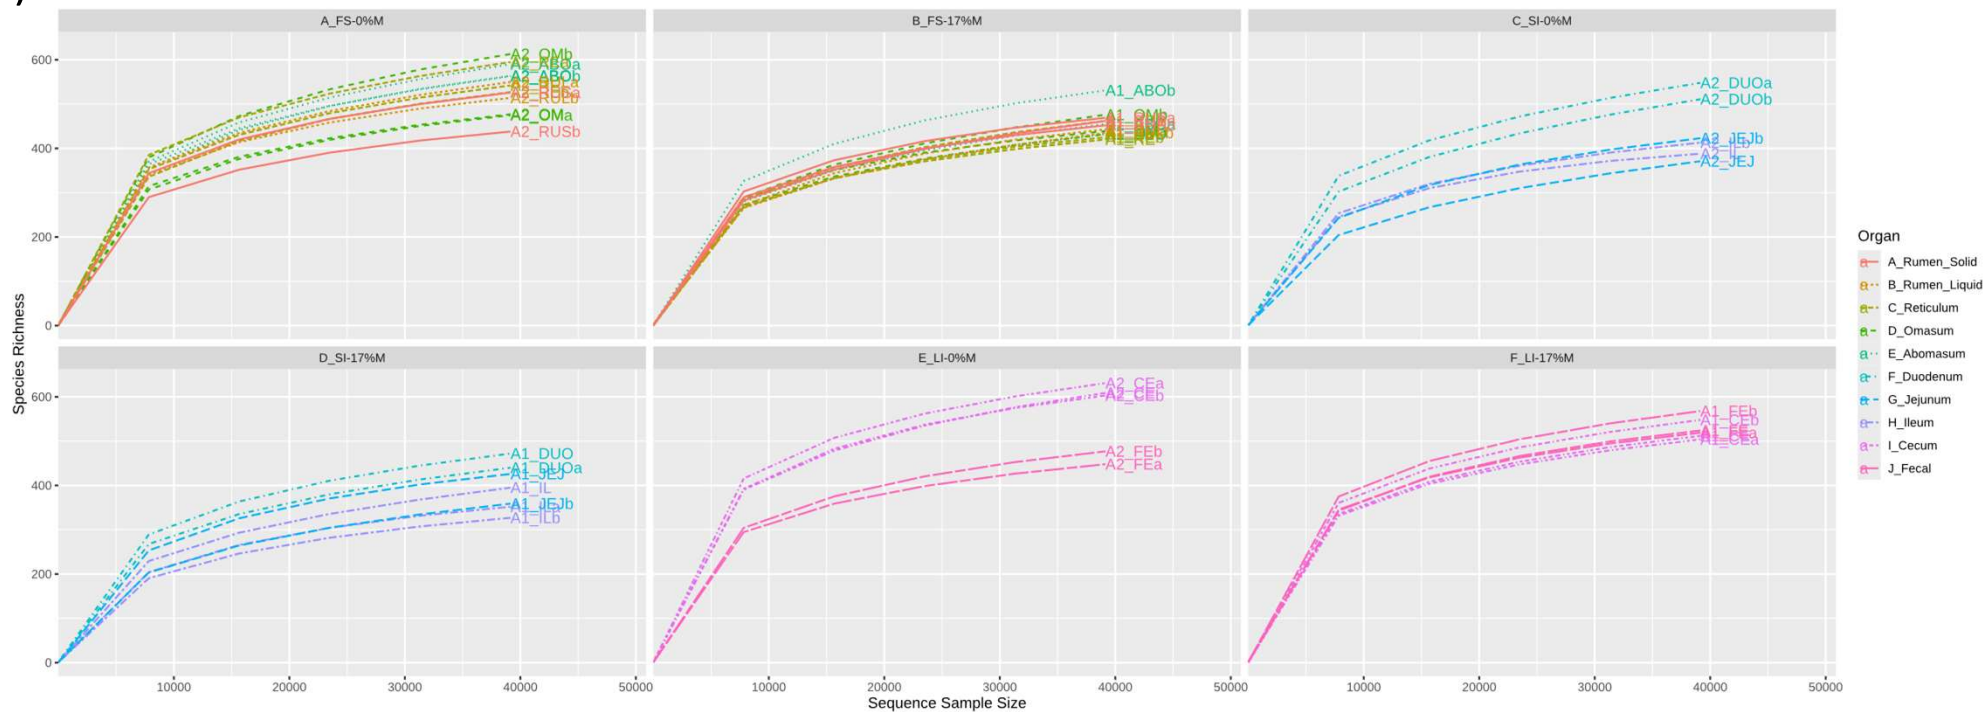

Supplement: Supplementary file 14 [file 96f0a58817c680a231a8cbf0.pdf]

(A)

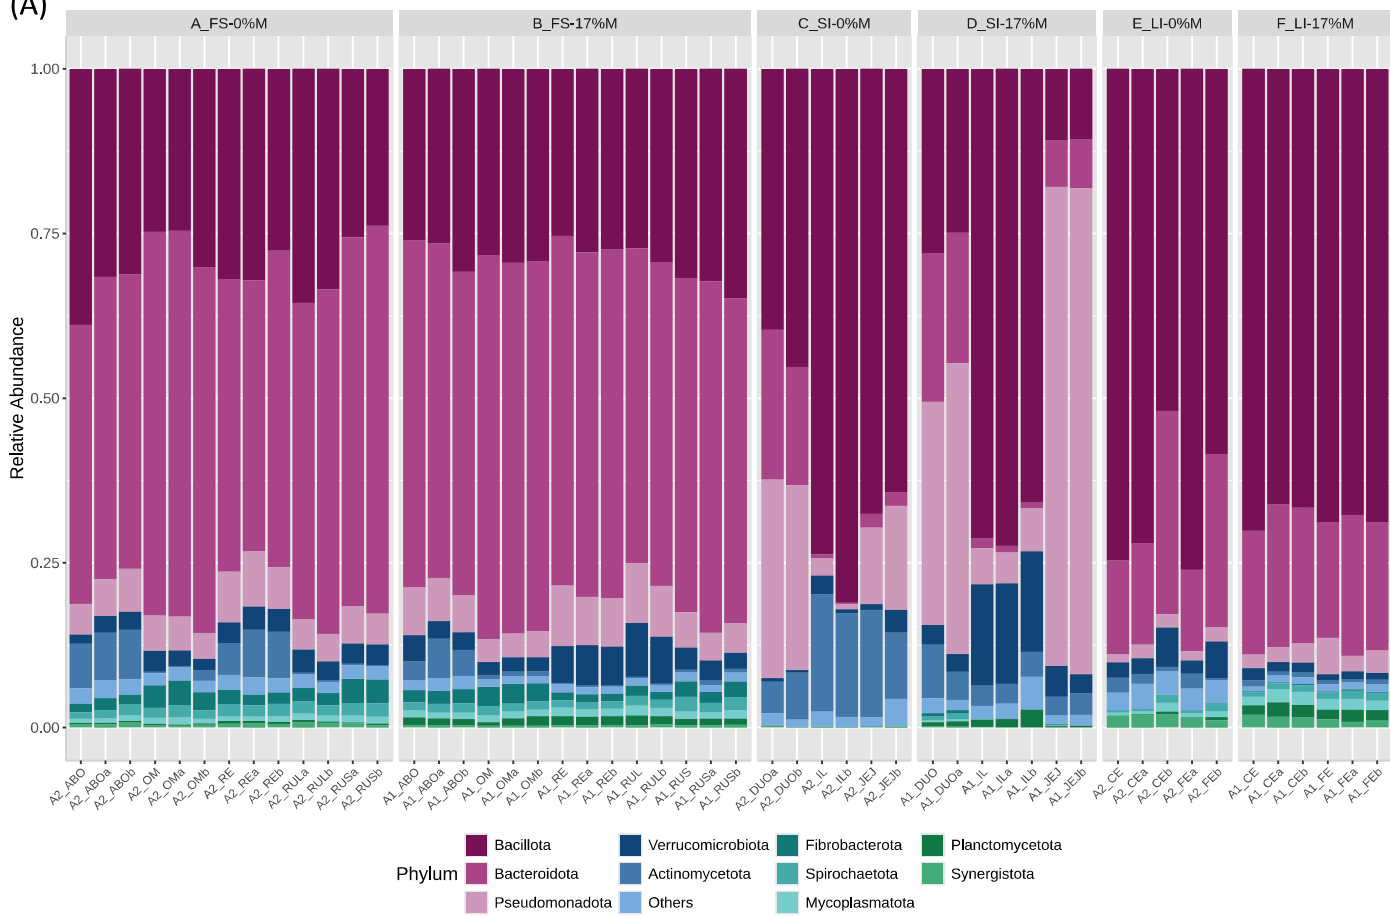

(B)

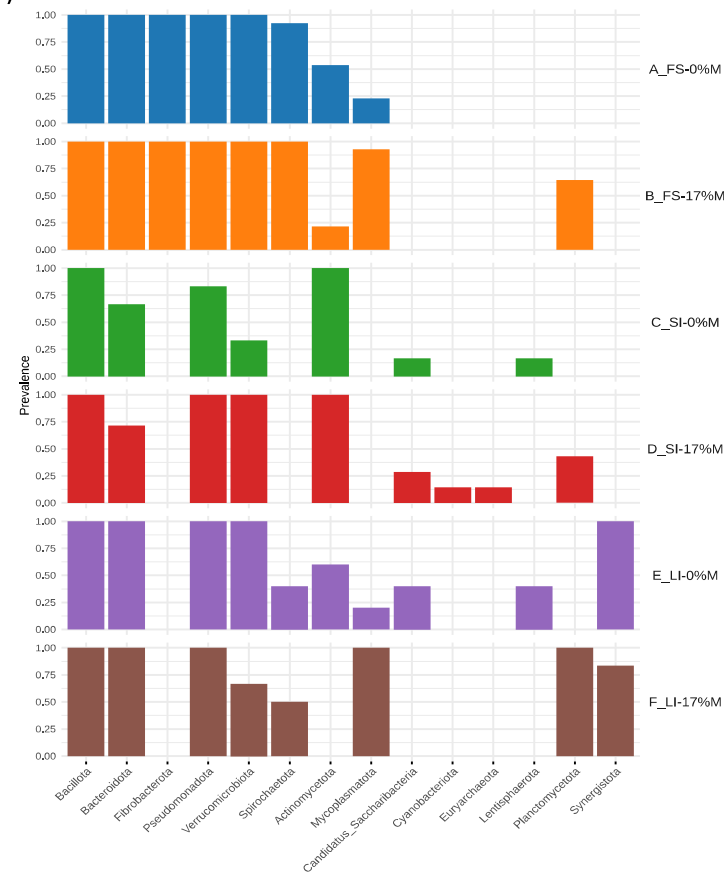

Supplement: Supplementary file 16 [file ad58be4ecfc2bf6af45400ab.pdf]

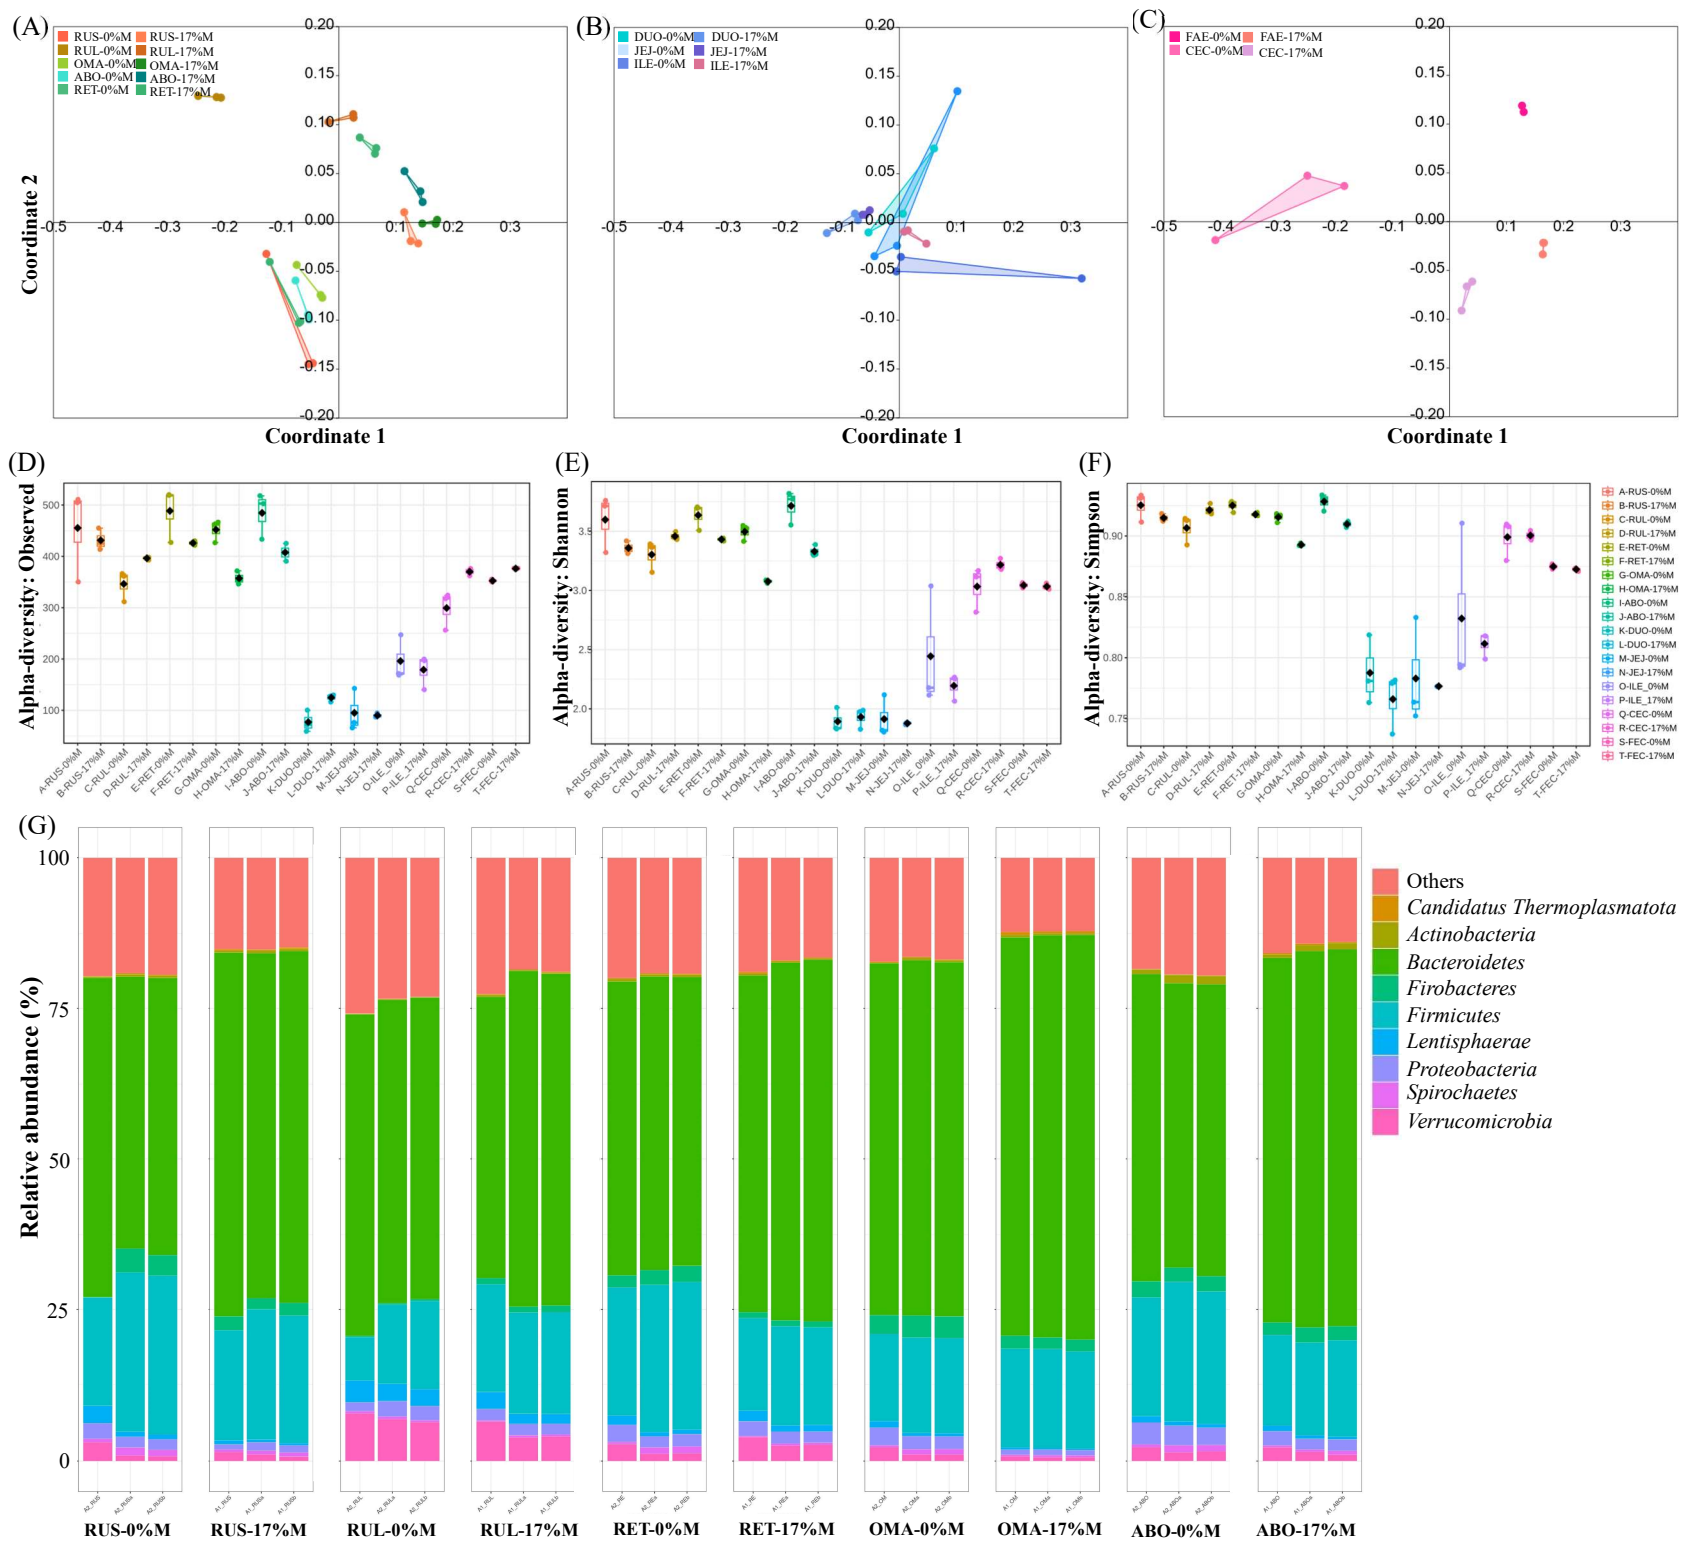

Supplement: Supplementary file 17 [file ae917a7589e55df2043ba3f2.pdf]

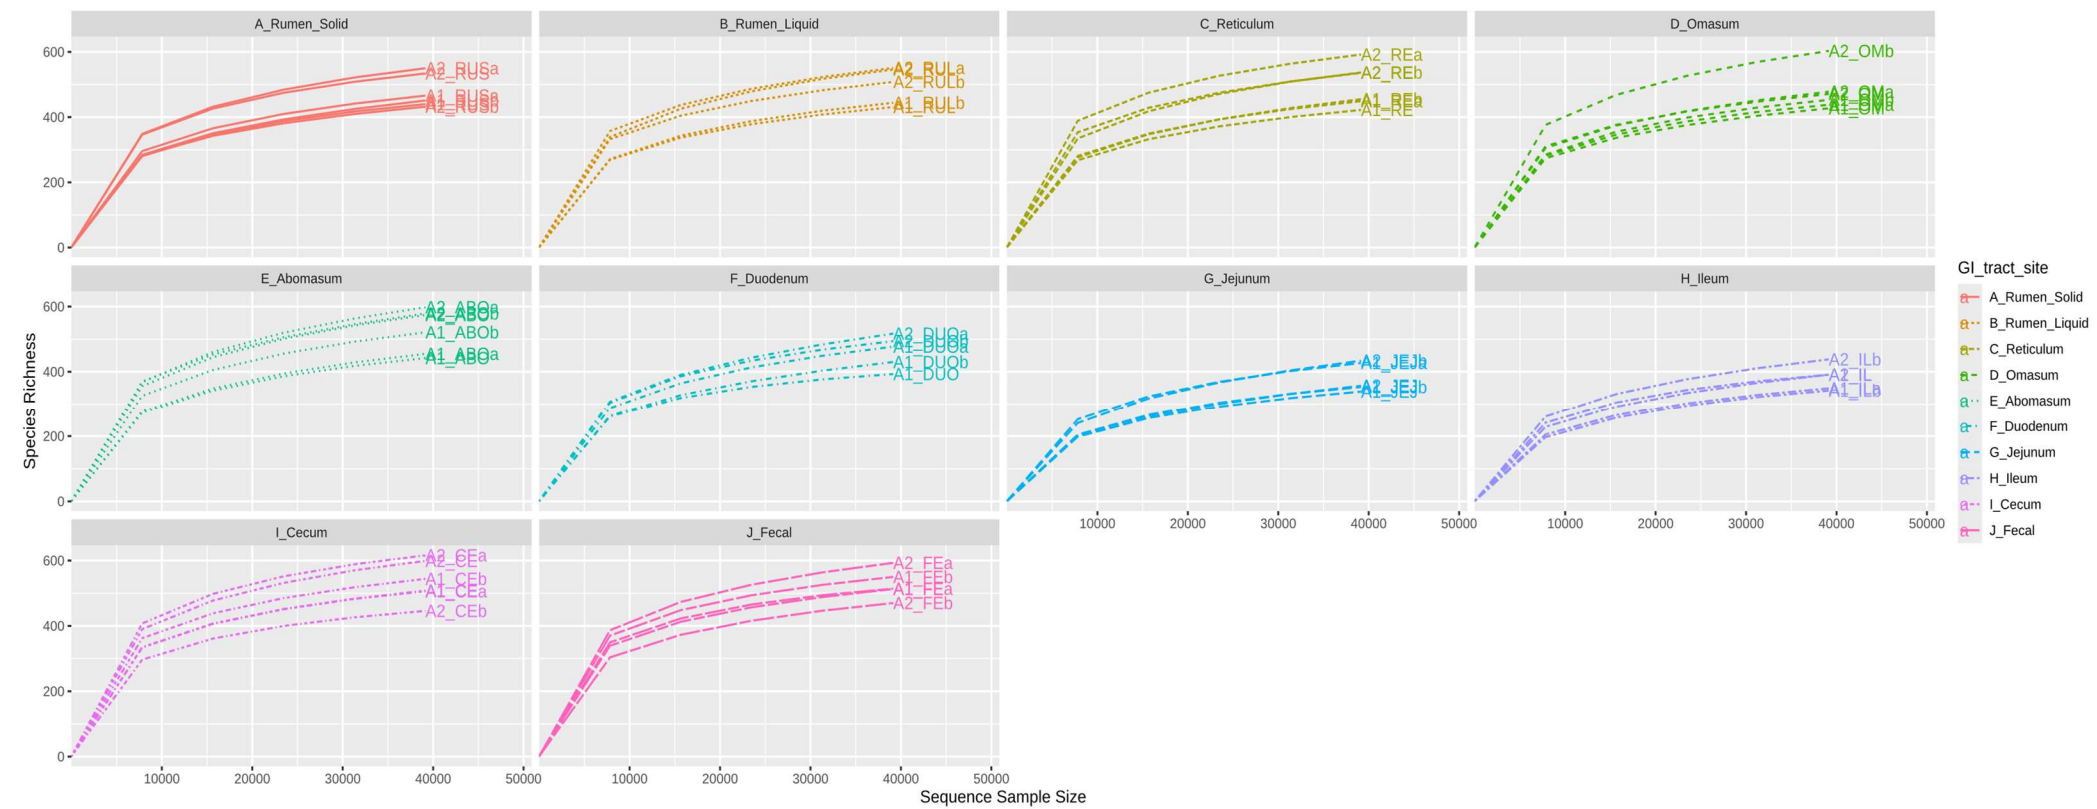

Supplement: Supplementary file 18 [file c37a23331b4c3f3e0a021d30.pdf]

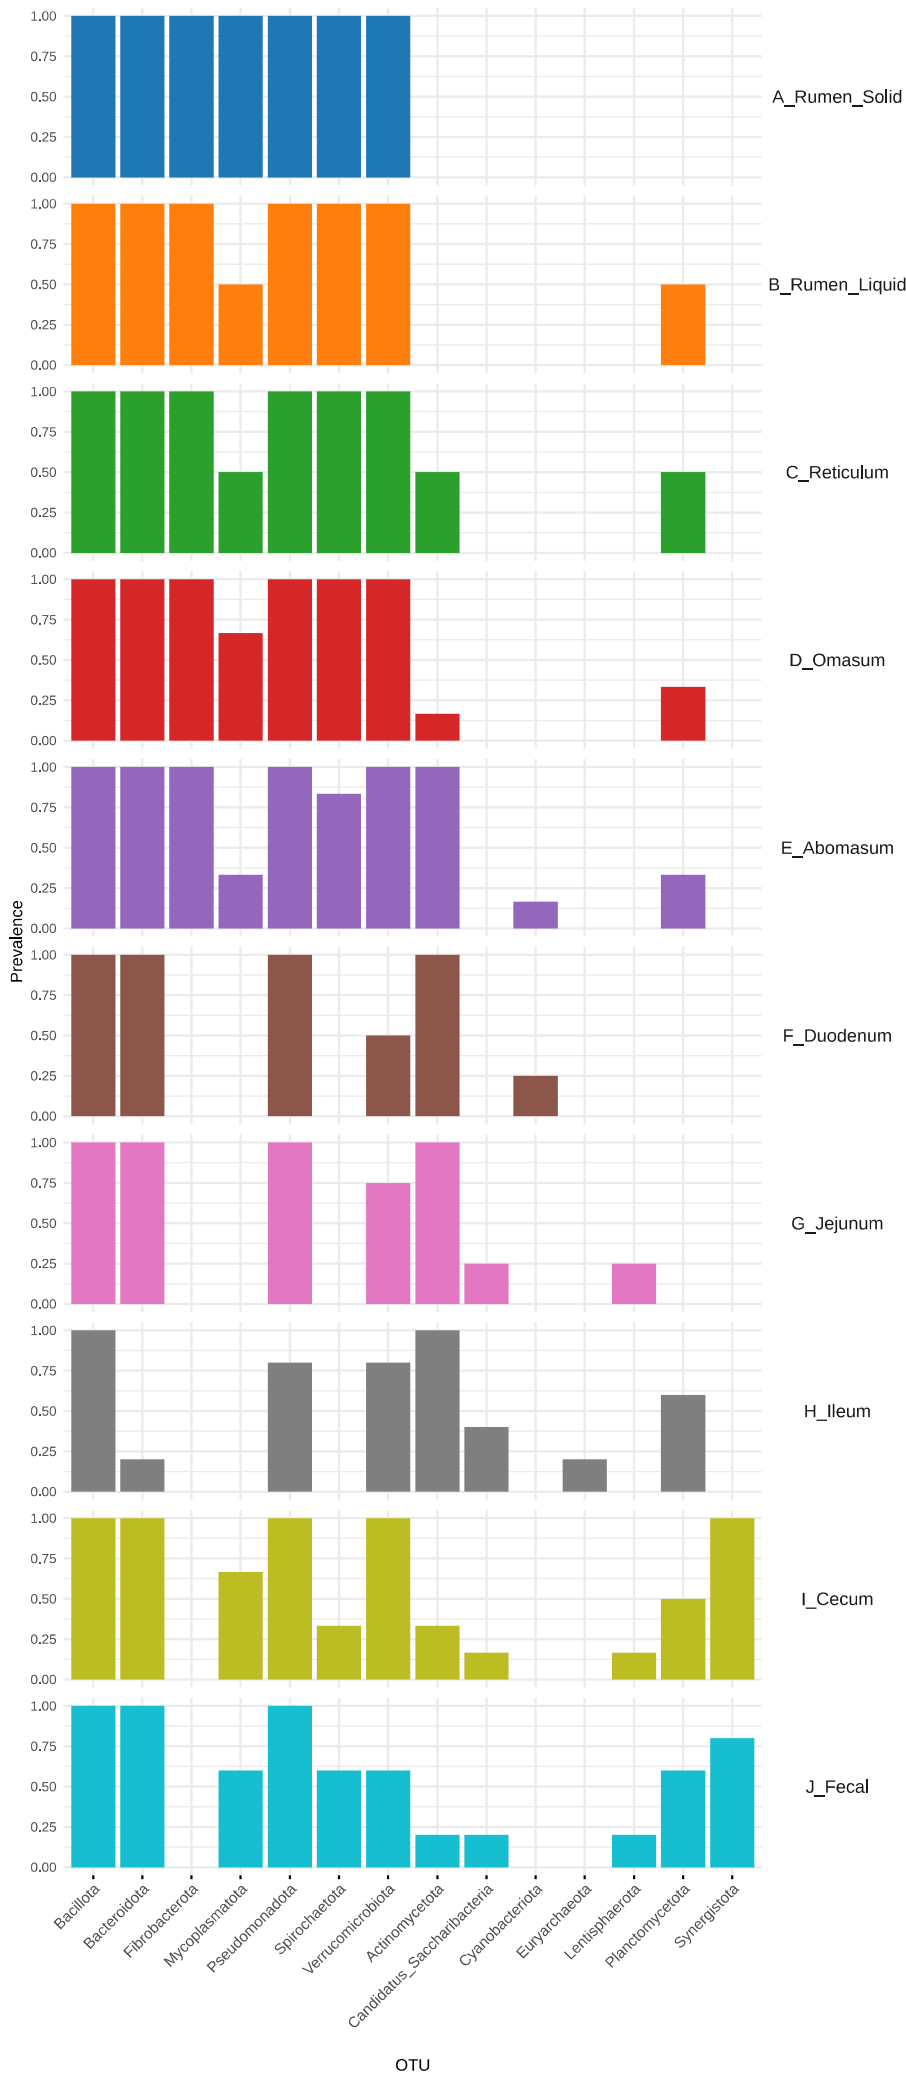

OTU

Supplement: Supplementary file 19 [file cb0039e5056d1728d9665bdc.pdf]

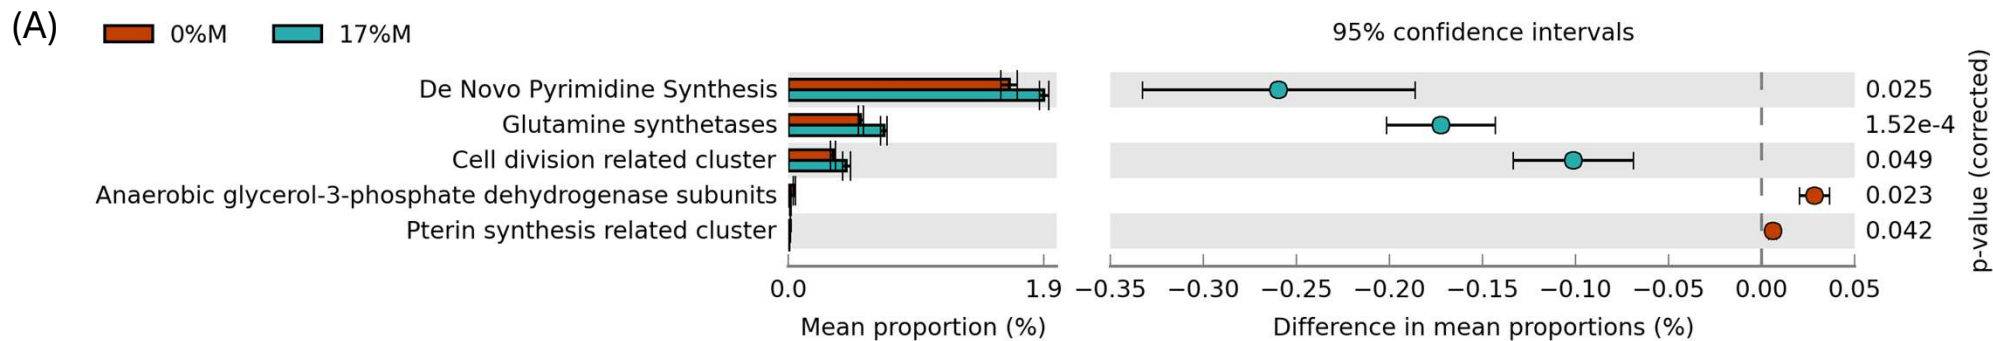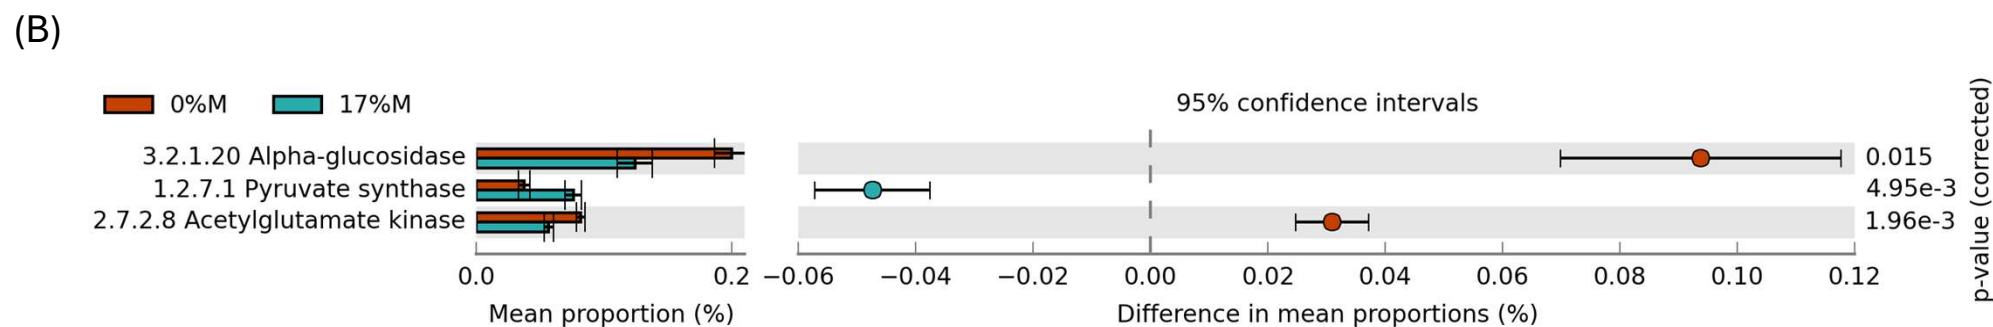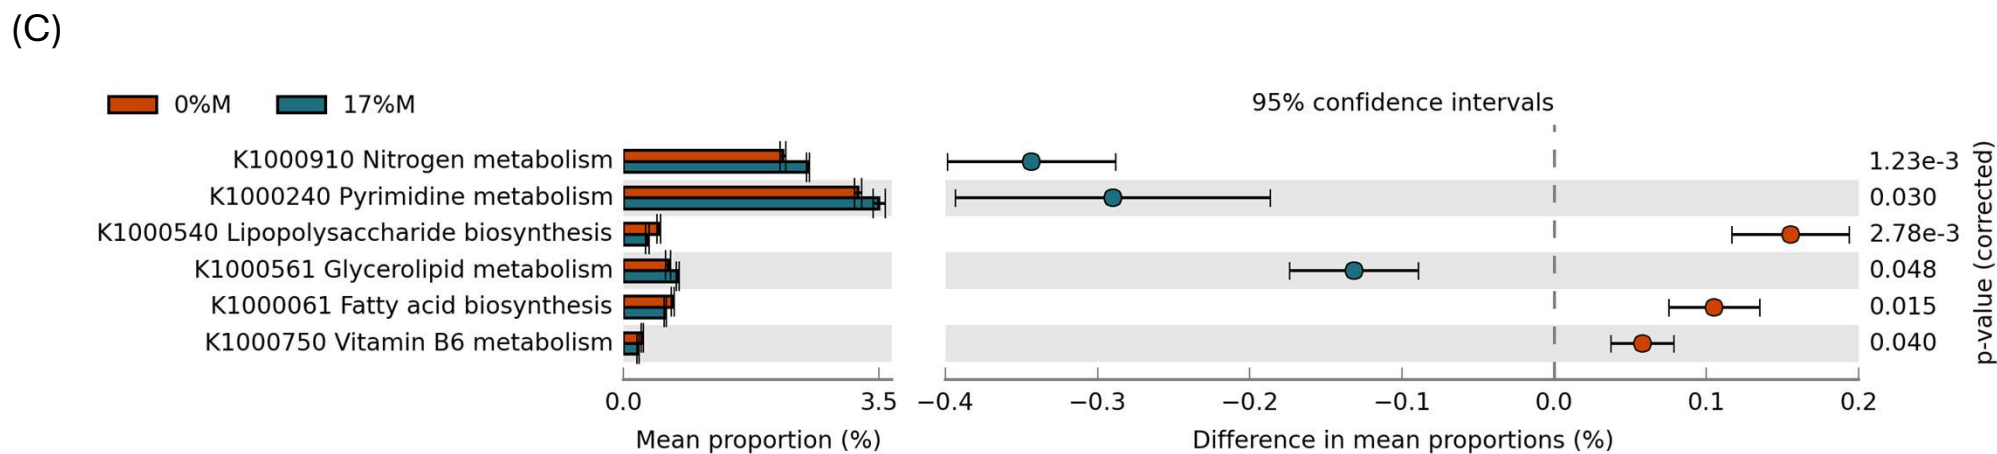

Supplement: Supplementary file 20 [file cc688be2825ed2ff41e6734b.pdf]
